# Supplementary material for: A Bifurcated Multicomponent Synthesis Approach to Polycyclic Quinazolinones
Source: PubMed Central journal article supplement (PMC9552225; doi:10.1021/acs.joc.2c01561), 2022-09-12

## Supporting information

# A bifurcated multicomponent synthesis approach to polycyclic quinazolinones

Ruixue Xu<sup>†</sup>, Zefeng Wang<sup>†</sup>, Qiang Zheng, Pravin Patil, Alexander Dömling\*

University of Groningen, Department of Drug Design, A. Deusinglaan 1, 9713 AV, Groningen, The Netherlands

<sup>†</sup>These authors contributed equally.

\*E-mail: a.s.s.domling@rug.nl, [www.drugdesign.nl](http://www.drugdesign.nl).

## Table of Contents

|                                                                                      |    |
|--------------------------------------------------------------------------------------|----|
| <sup>1</sup> H NMR & <sup>13</sup> C NMR chromatograms of U-4CR products.....        | 2  |
| <sup>1</sup> H NMR & <sup>13</sup> C NMR chromatograms of cyclization products ..... | 31 |

# $^1\text{H}$ NMR & $^{13}\text{C}\{^1\text{H}\}$ NMR chromatograms of U-4CR products

## 2-bromo-N-(1-(2-cyanophenyl)-2-(cyclohexylamino)-2-oxoethyl)benzamide (10a)

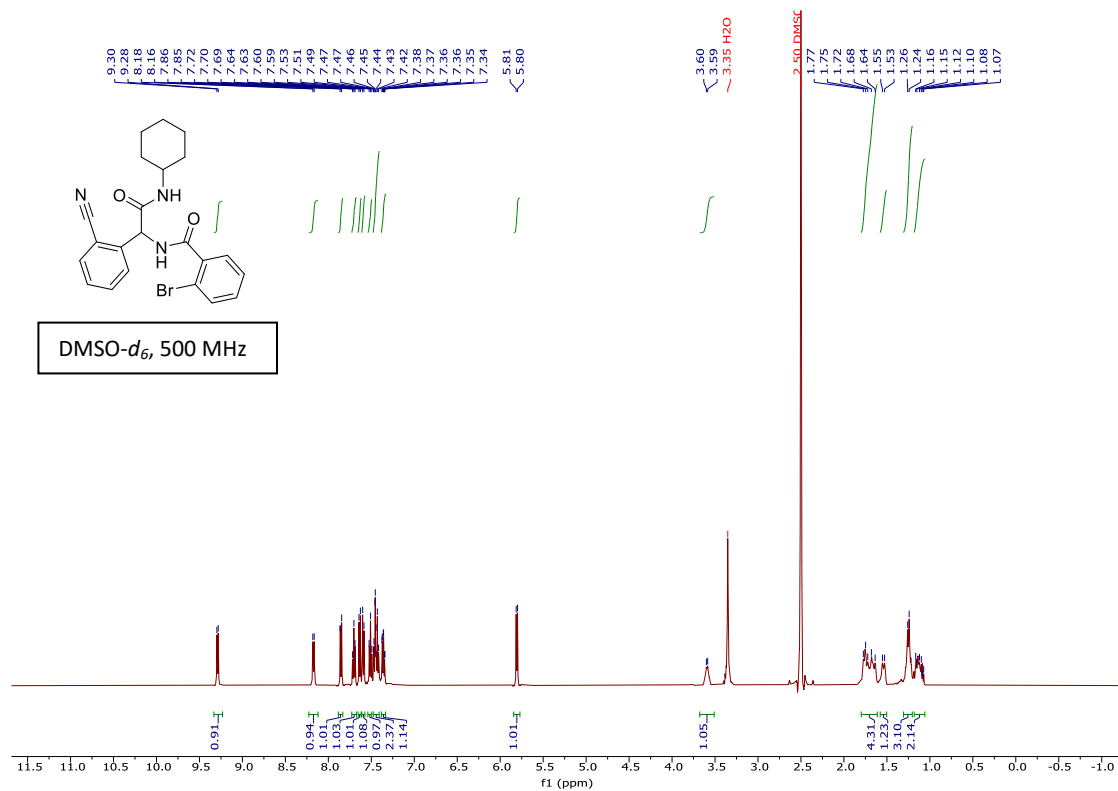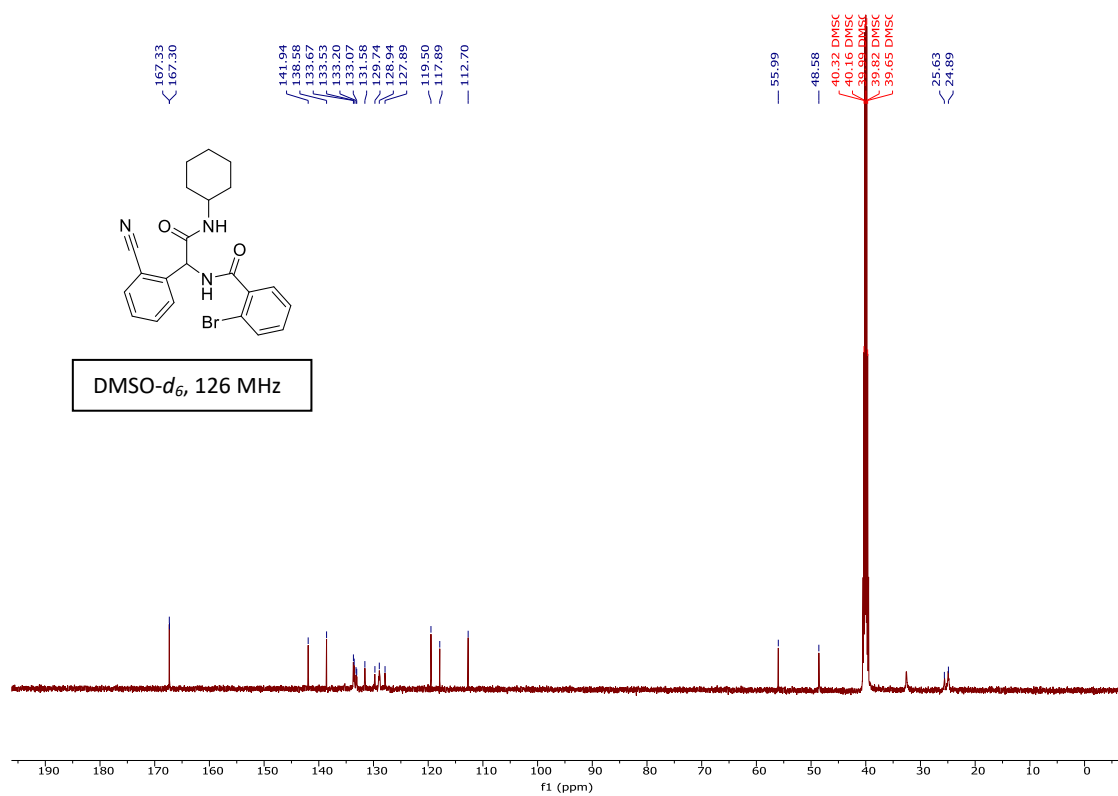

N-(2-(benzylamino)-1-(2-cyanophenyl)-2-oxoethyl)-2-bromobenzamide (**11a**)

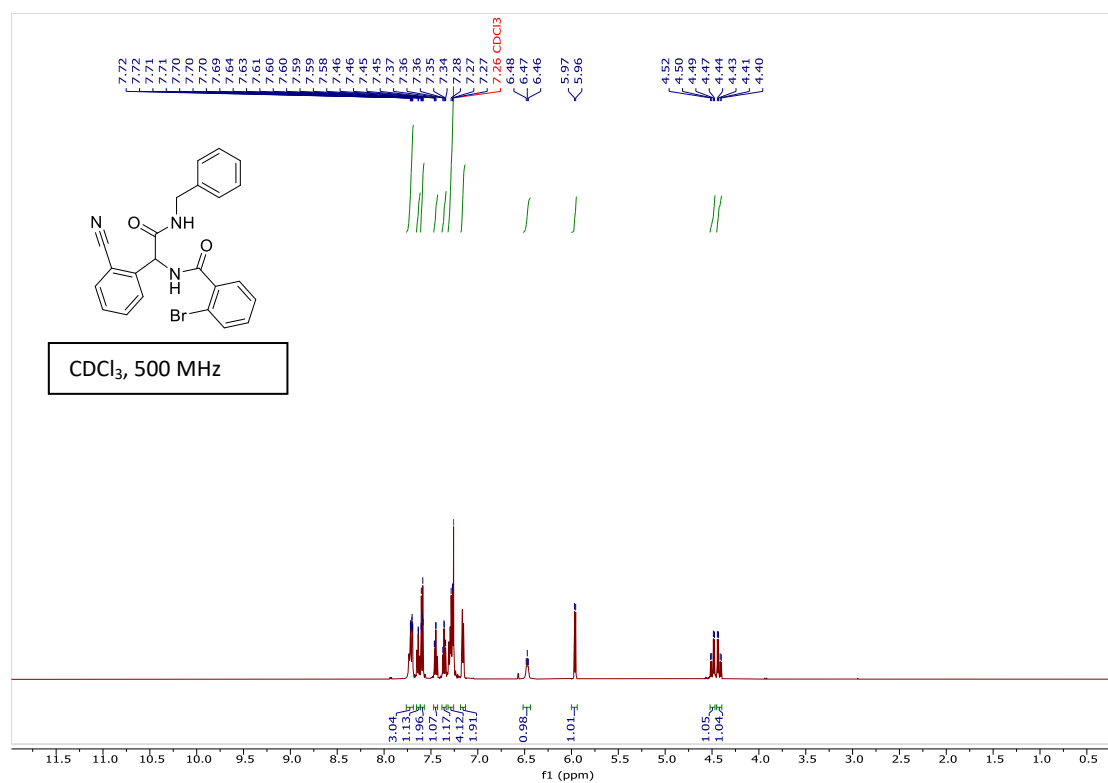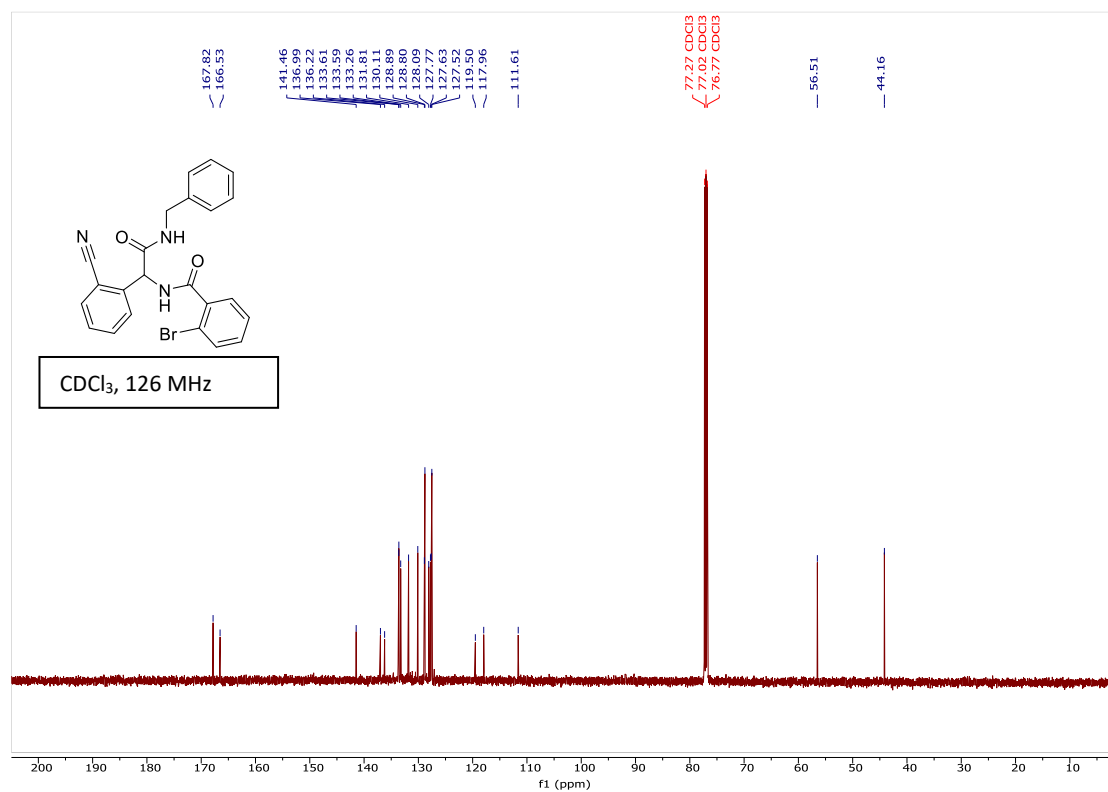

2-bromo-N-(1-(2-cyanophenyl)-2-oxo-2-(phenethylamino)ethyl)benzamide (**12a**)

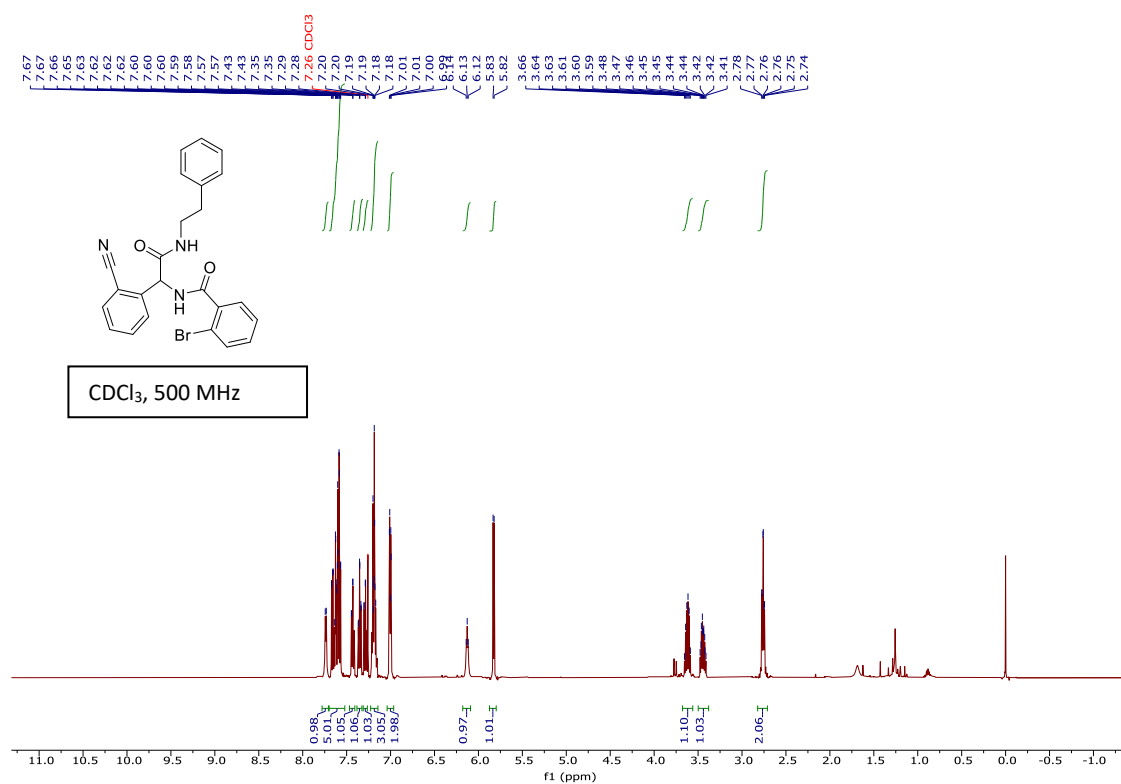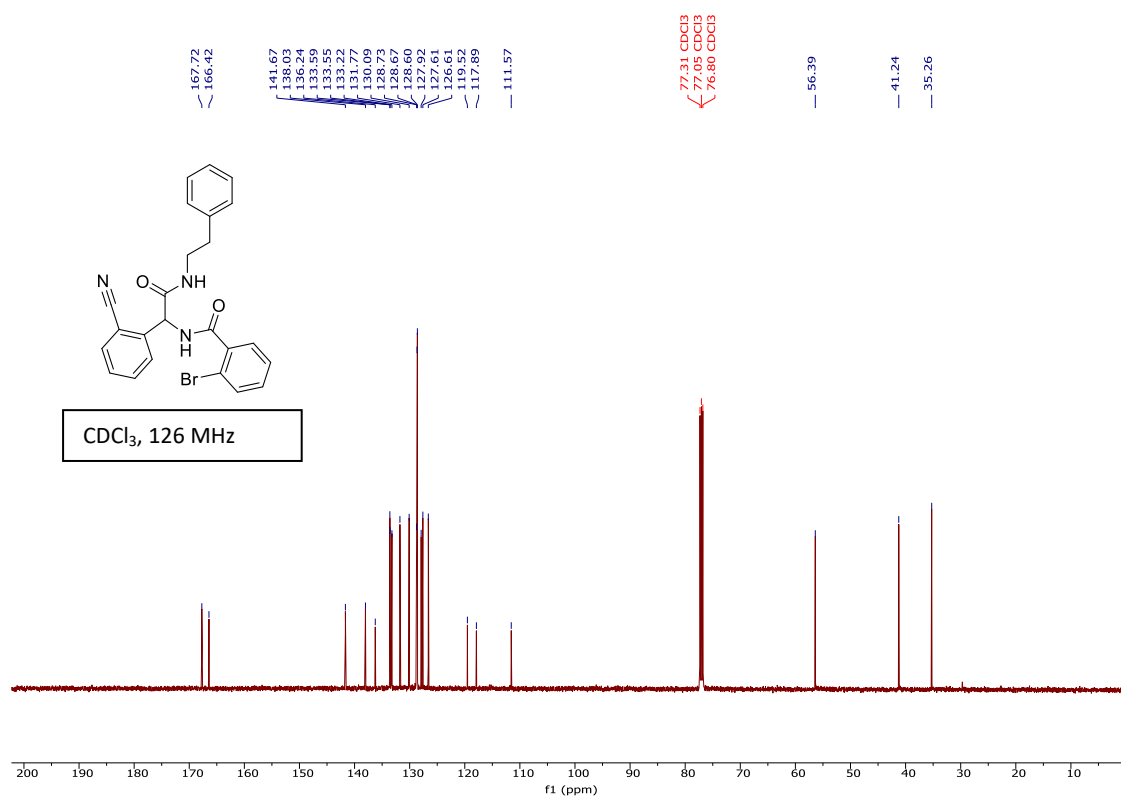

2-bromo-N-(2-((4-chlorophenyl)amino)-1-(2-cyanophenyl)-2-oxoethyl)benzamide  
(13a)

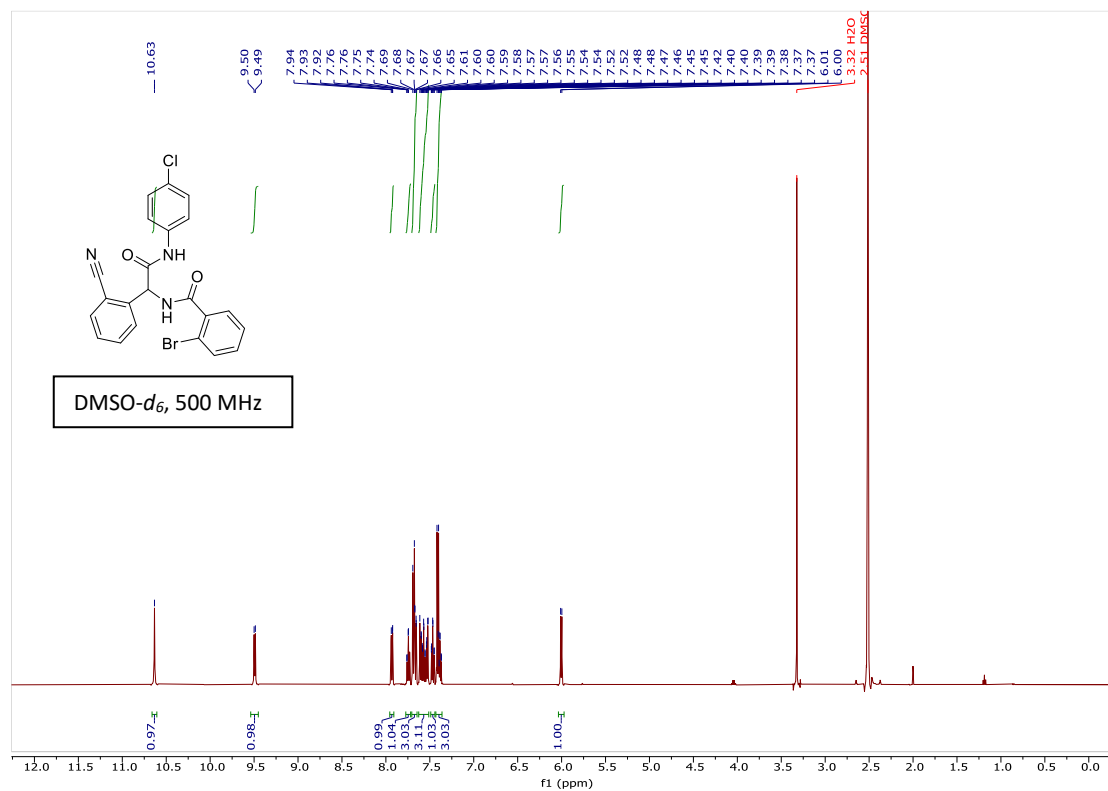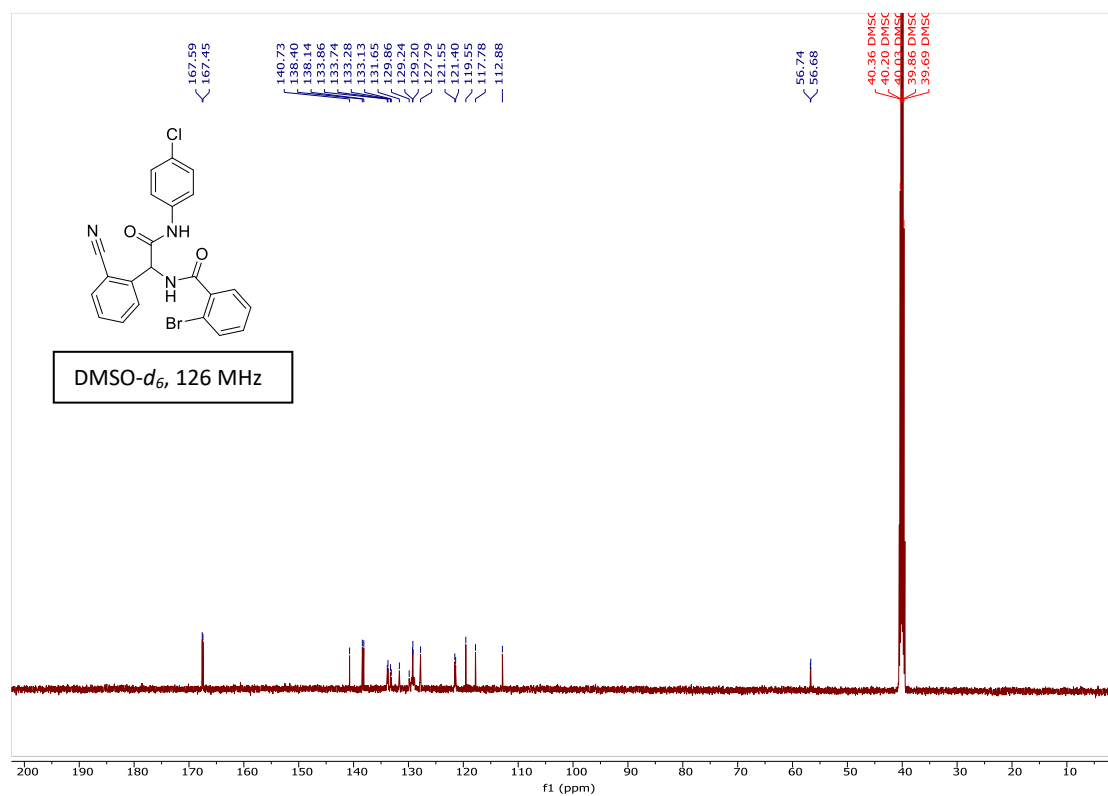

2-bromo-N-(1-(2-cyanophenyl)-2-(((3-methylthiophen-2-yl)methyl)amino)-2-oxoethyl) benzamide (**14a**)

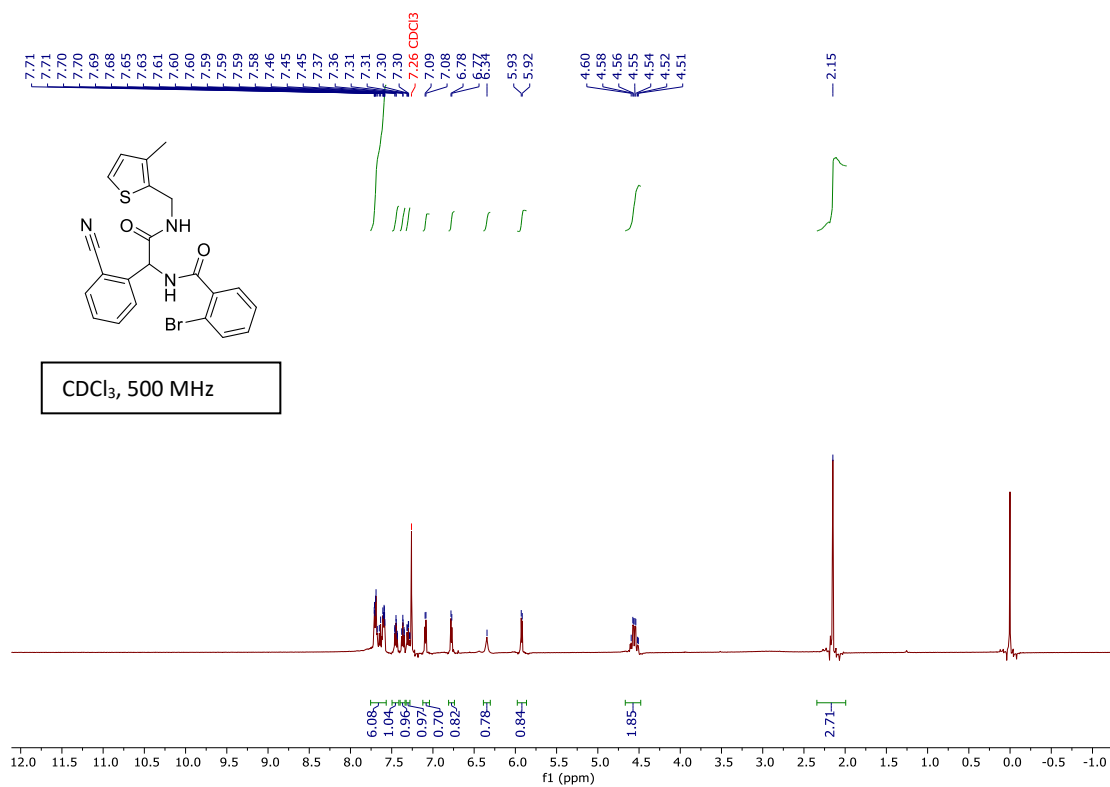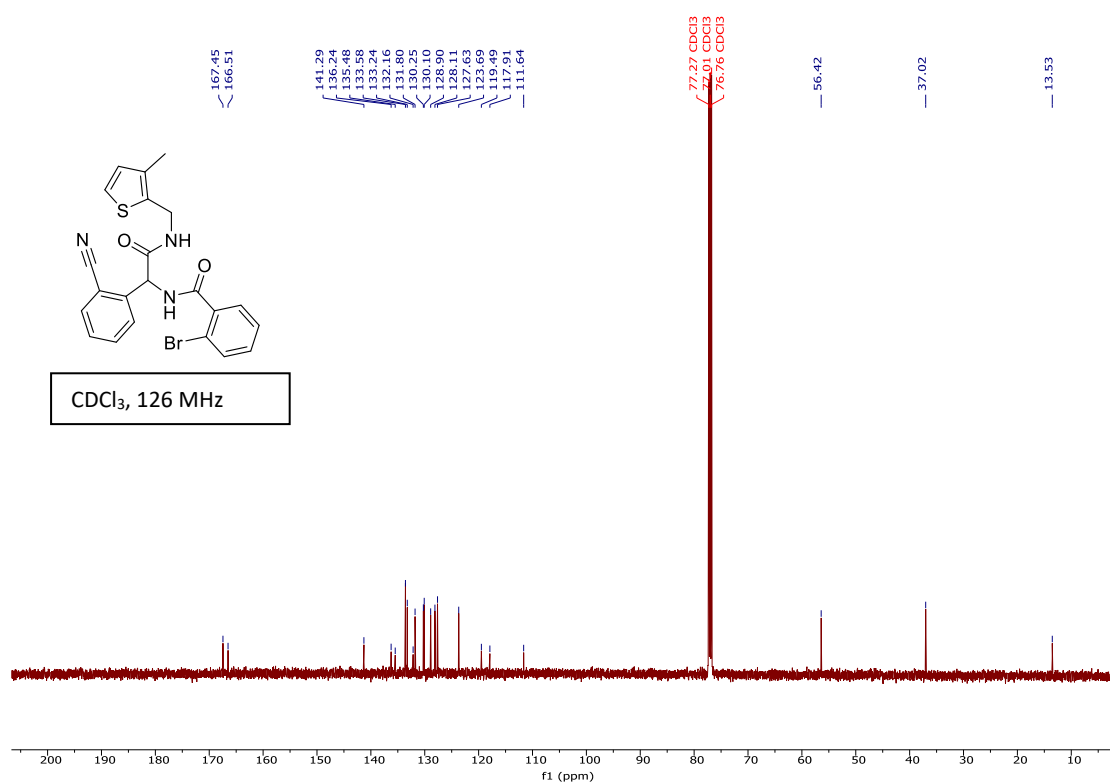

2-bromo-N-(1-(2-cyanophenyl)-2-((2-methoxybenzyl)amino)-2-oxoethyl)benzamide  
(15a)

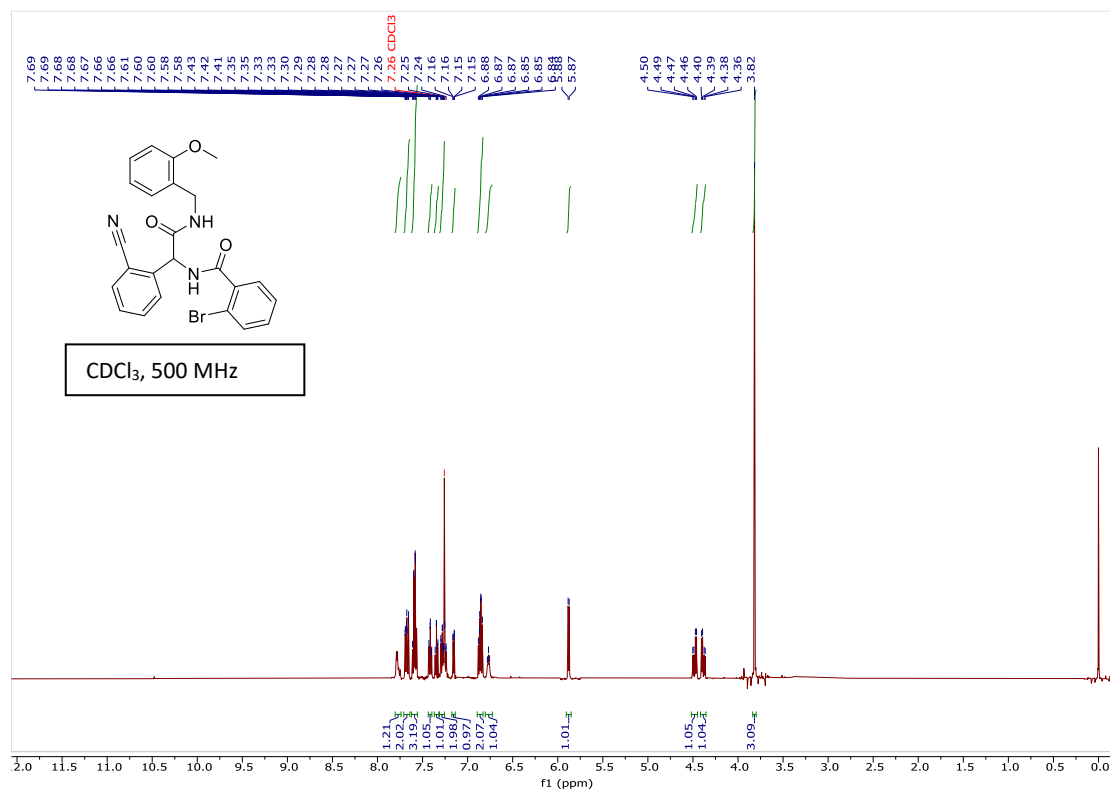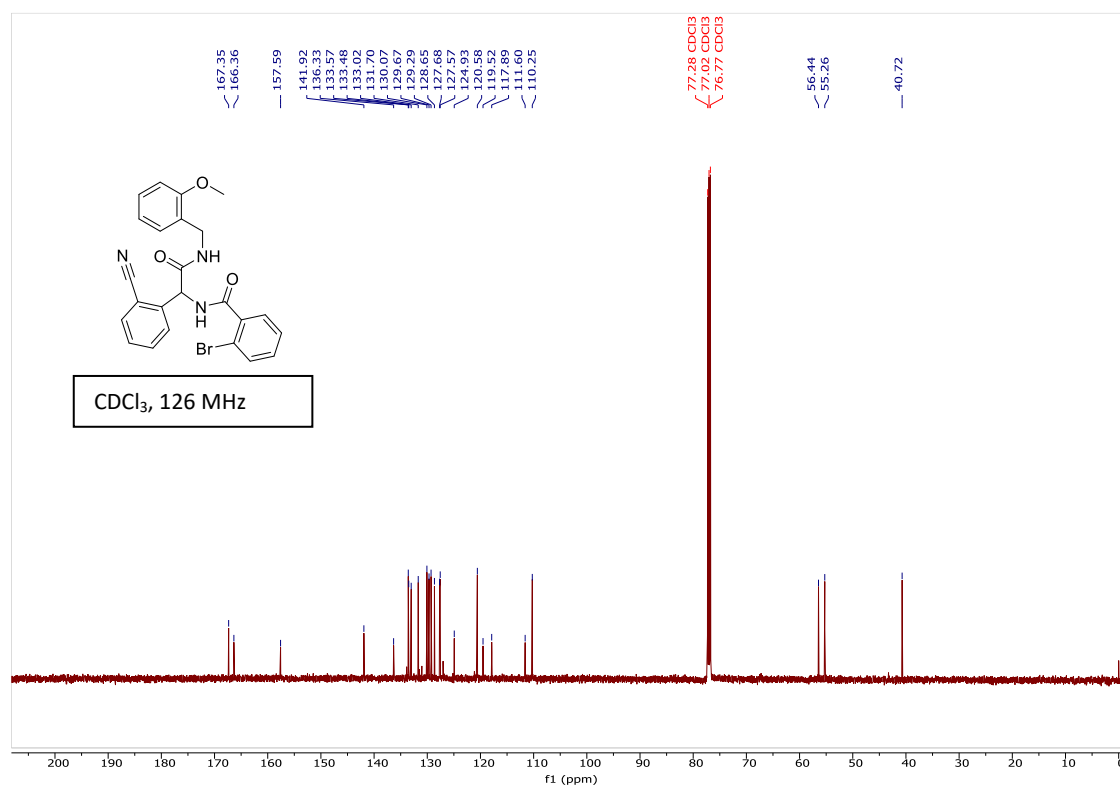

2-bromo-N-(1-(2-cyanophenyl)-2-oxo-2-((pyridin-3-ylmethyl)amino)ethyl)benzamide  
(16a)

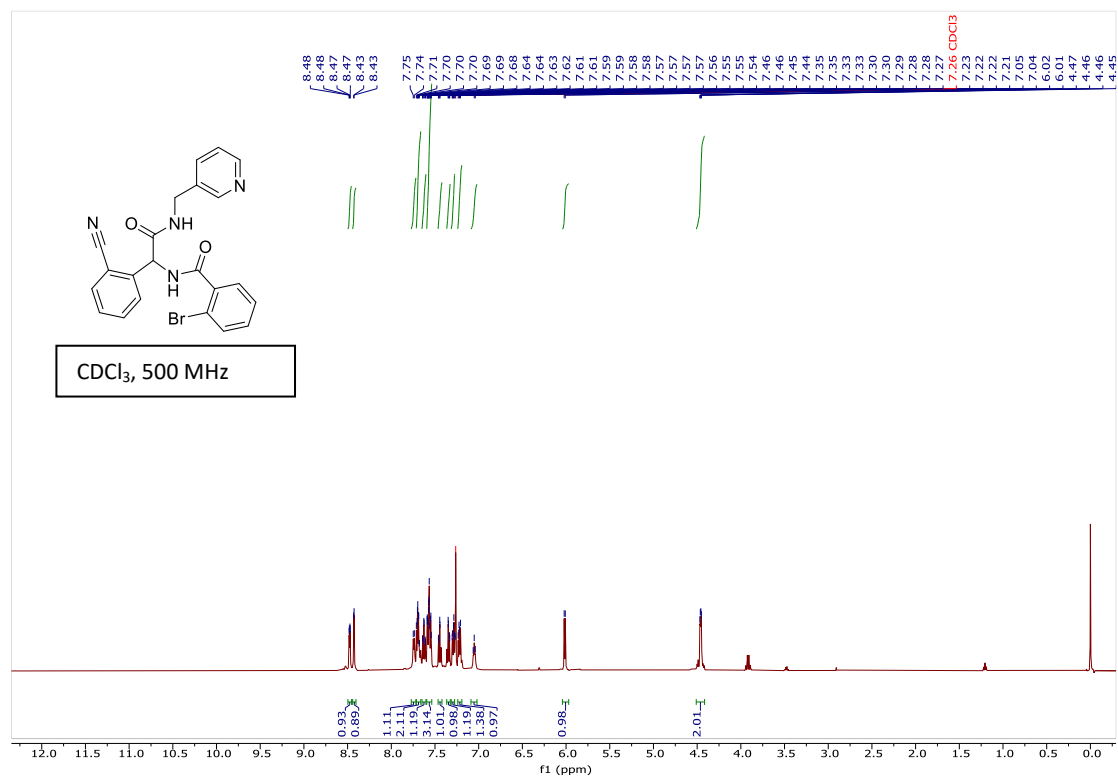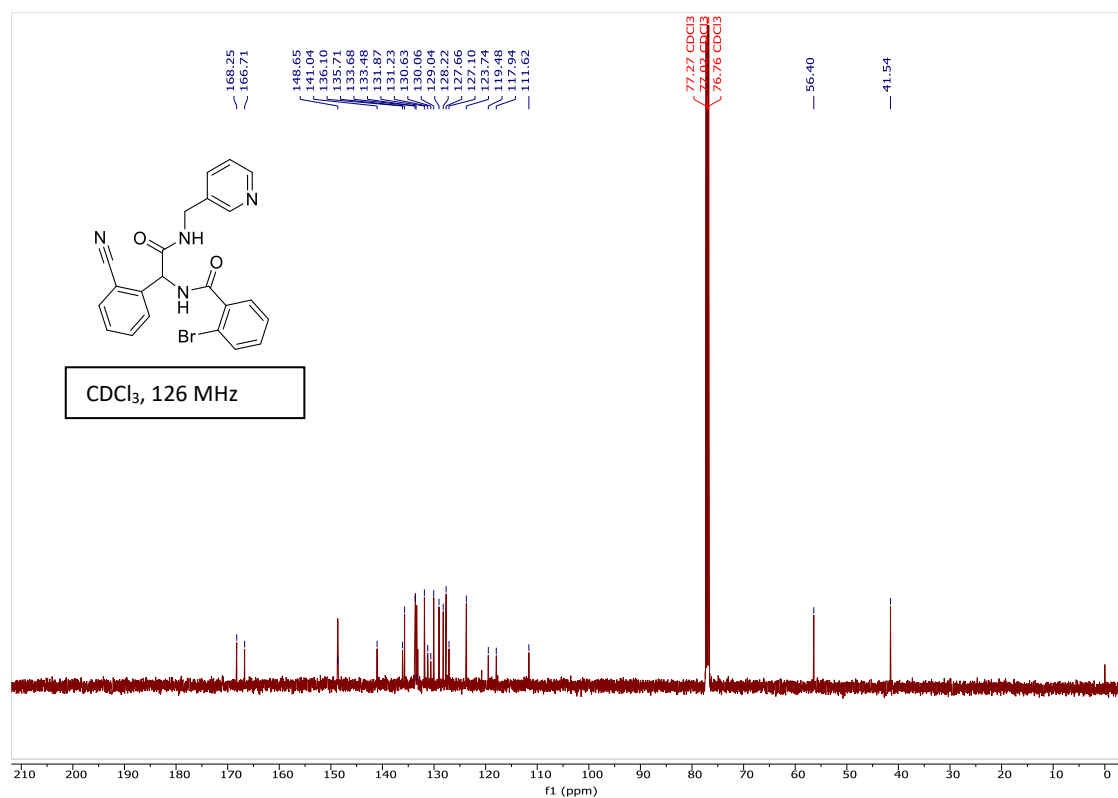



N-(2-(((3s,5s,7s)-adamantan-1-yl)amino)-1-(2-cyanophenyl)-2-oxoethyl)-2-bromobenzamide (**17a**)

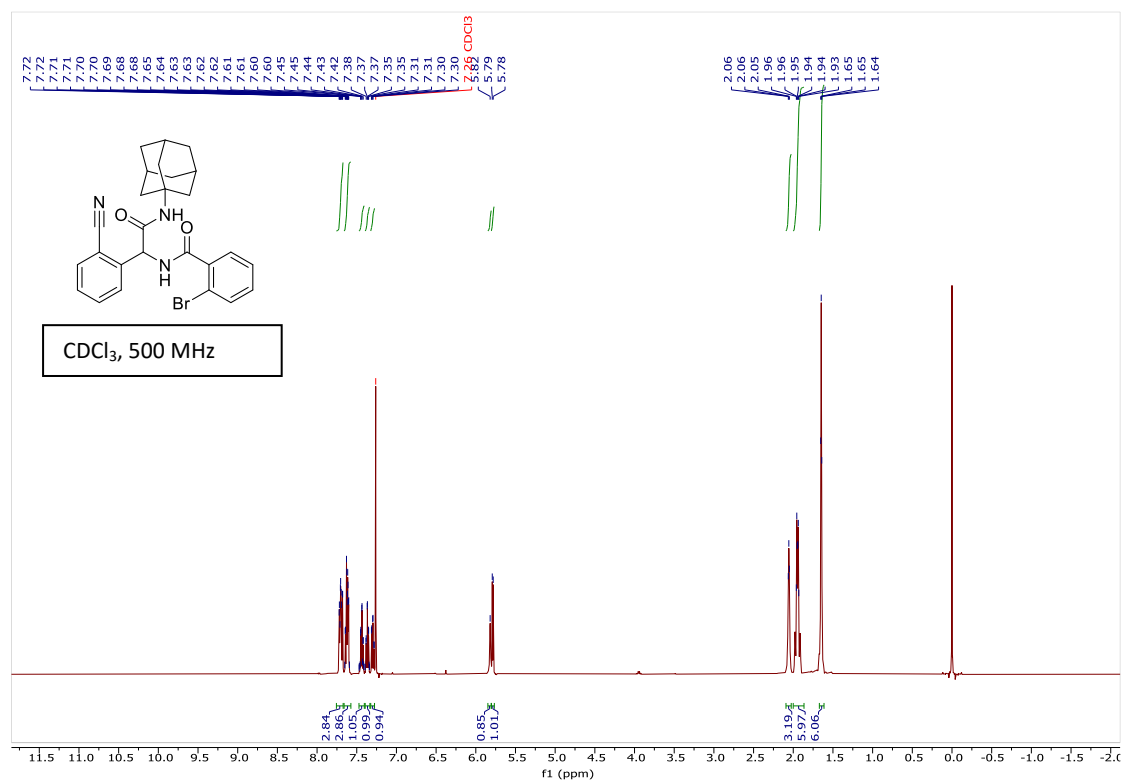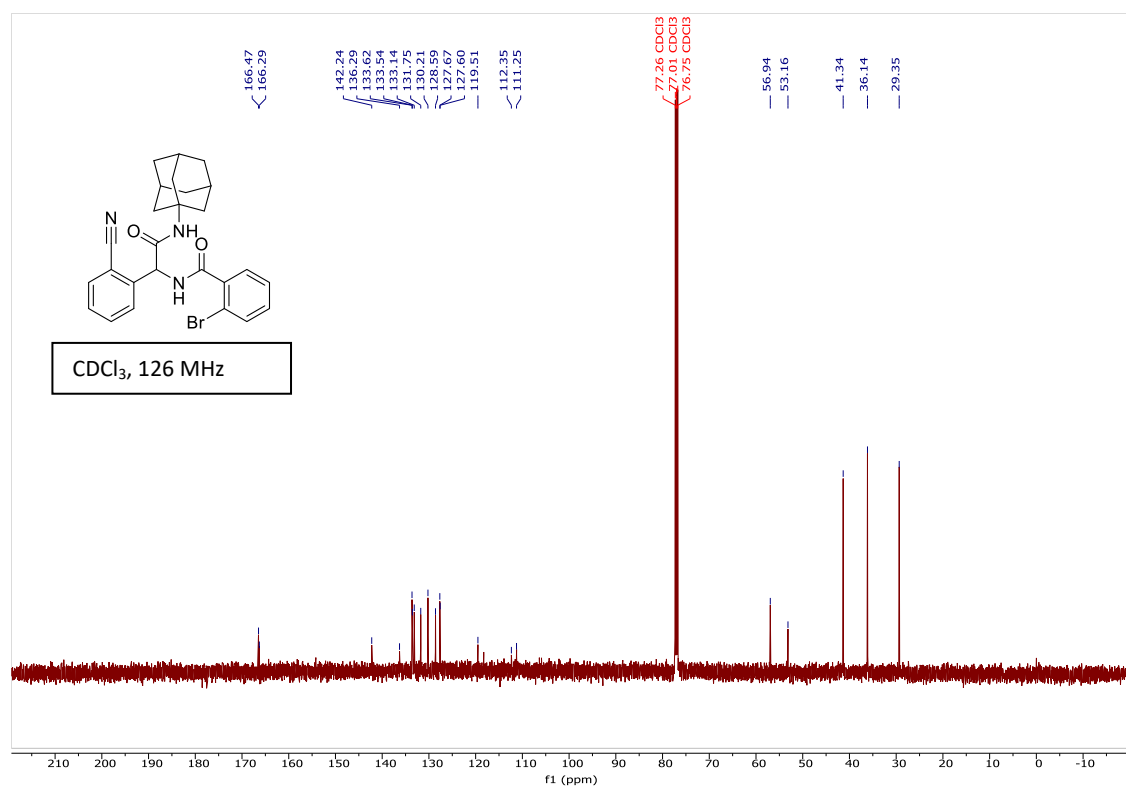

2-bromo-N-(1-(2-cyanophenyl)-2-oxo-2-(((tetrahydrofuran-2-yl)methyl)amino)ethyl)benzamide (**18a**)

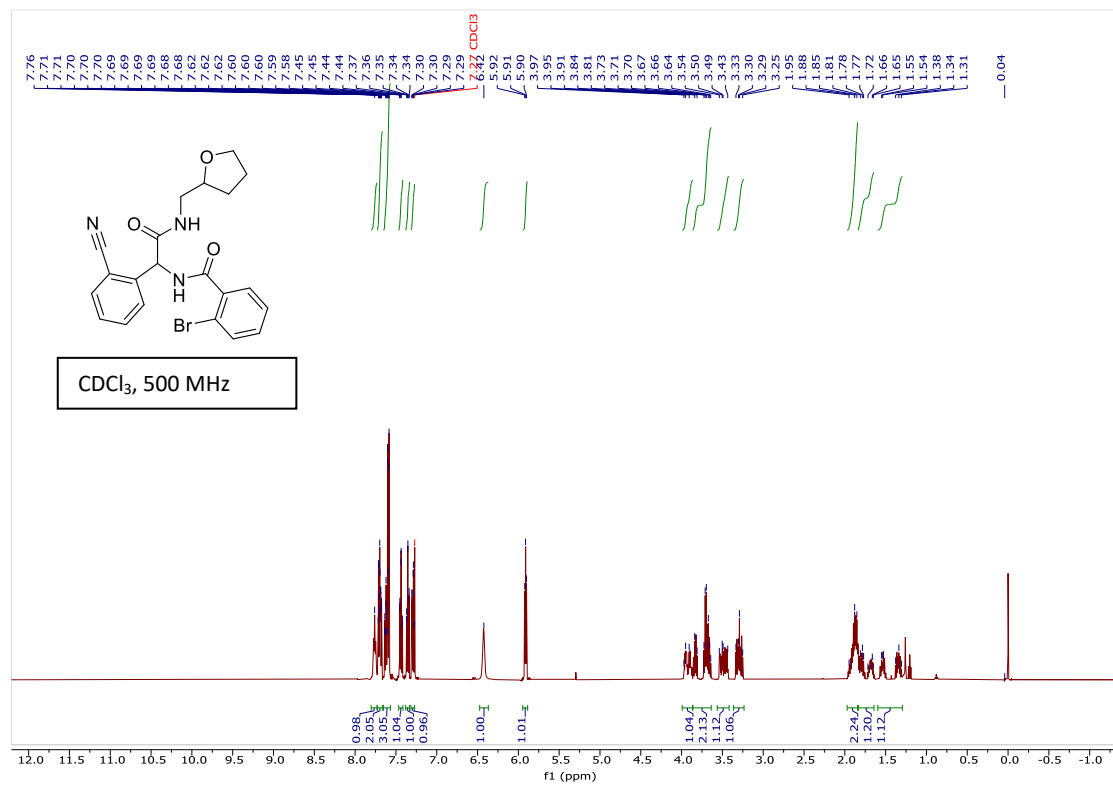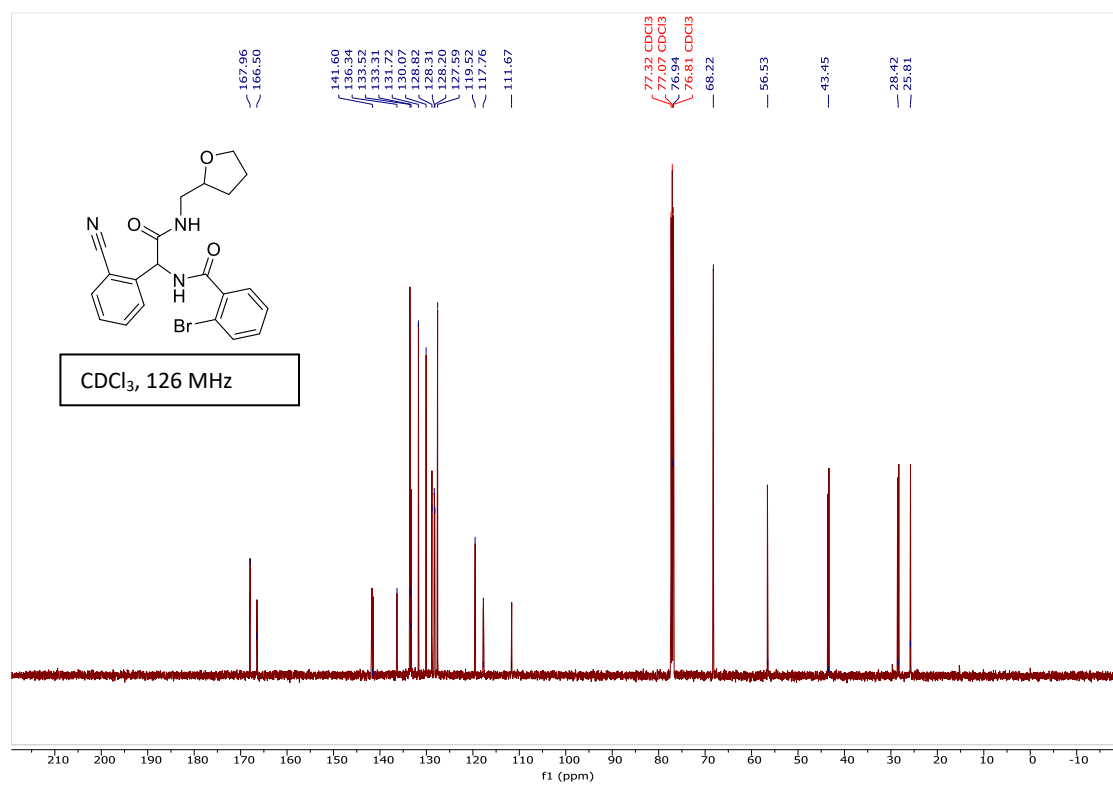

2-bromo-N-(1-(2-cyanophenyl)-2-oxo-2-((2,4,4-trimethylpentan-2-yl)amino)ethyl)benzamide (**19a**)

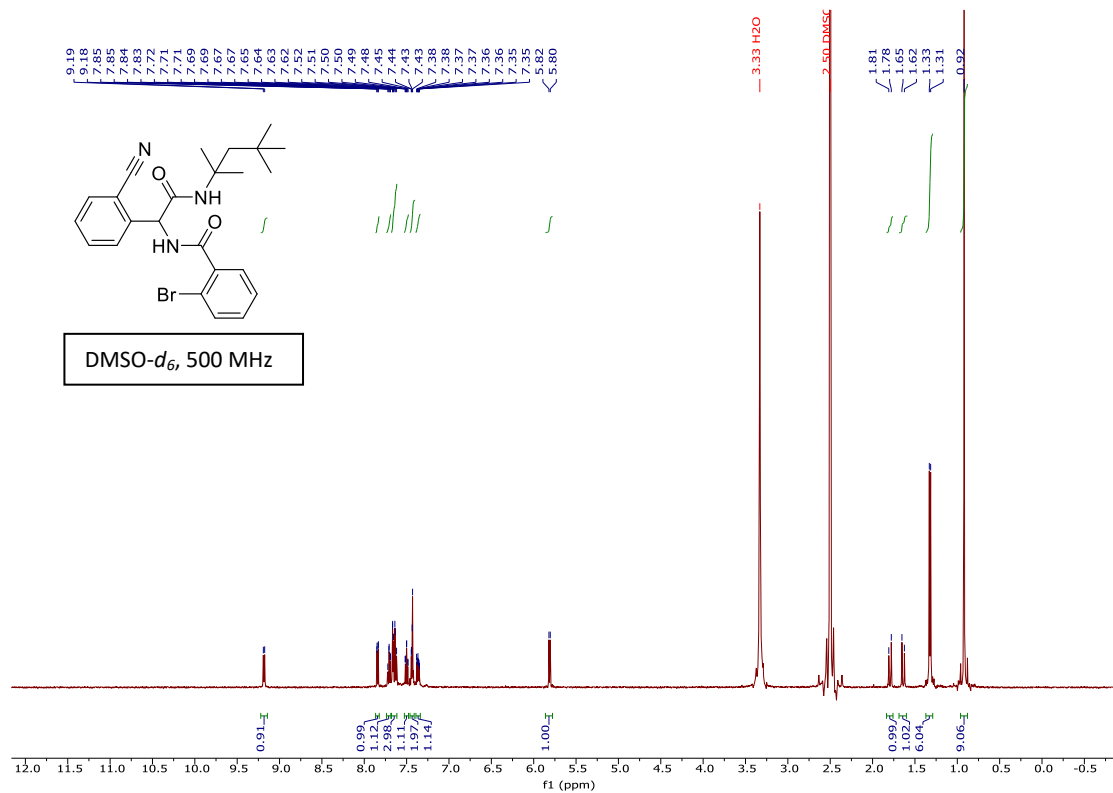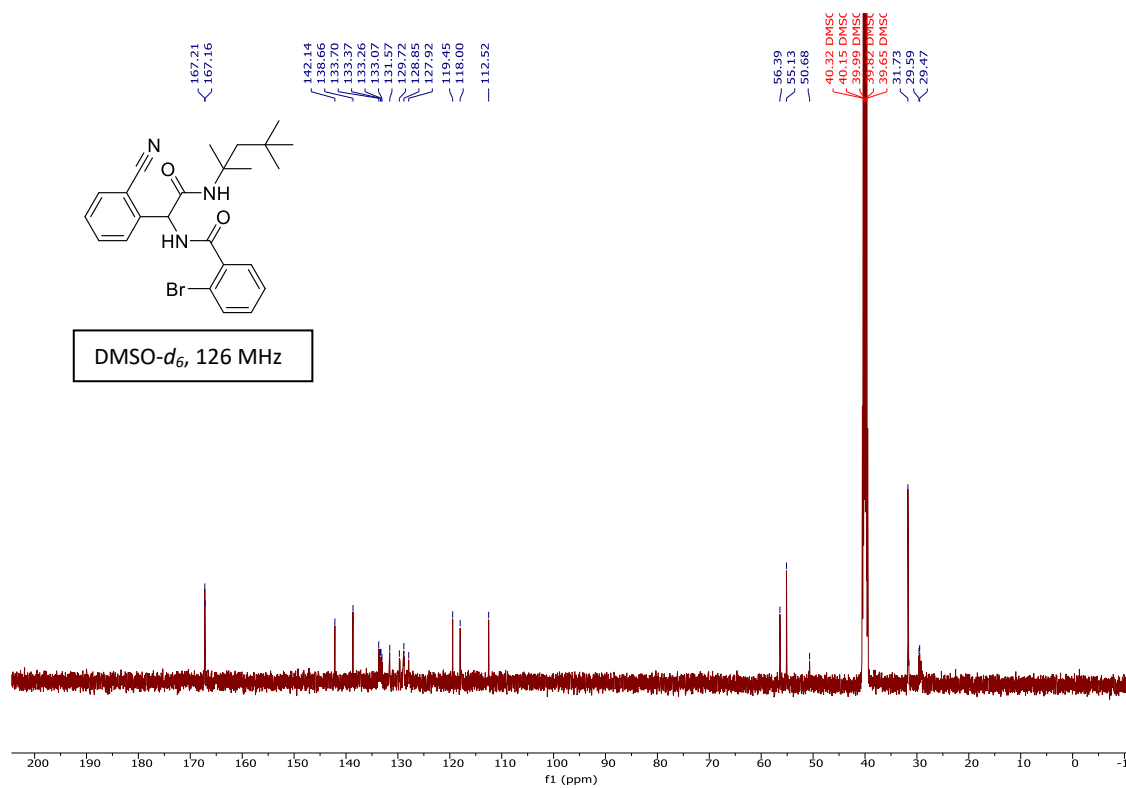

methyl (2-(2-bromobenzamido)-2-(2-cyanophenyl)acetyl)glycinate (**20a**)

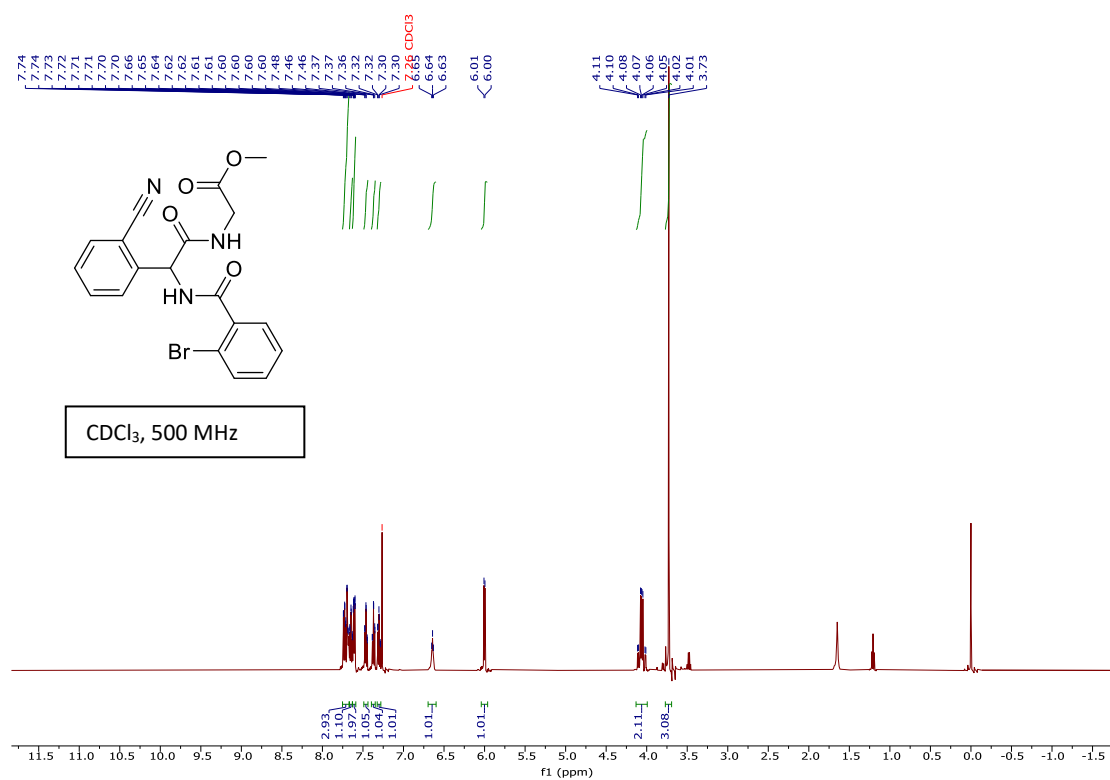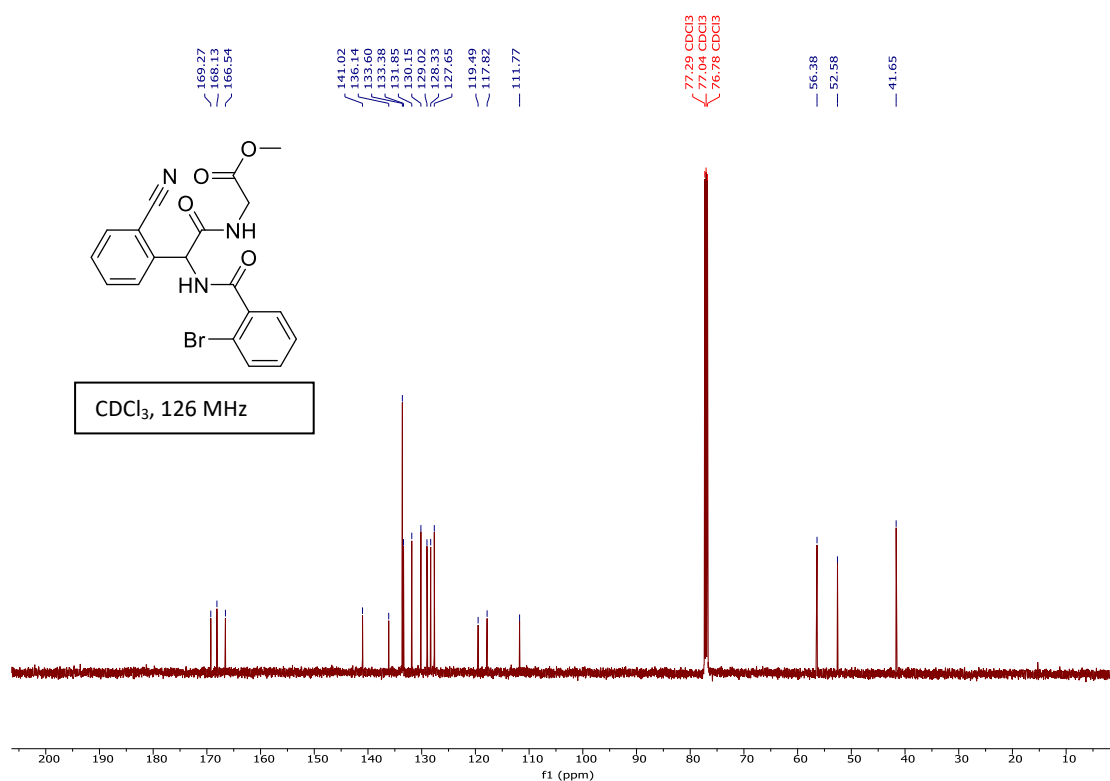

tert-butyl (2-(2-(2-bromobenzamido)-2-(2-cyanophenyl)acetamido)ethyl)carbamate  
(21a)

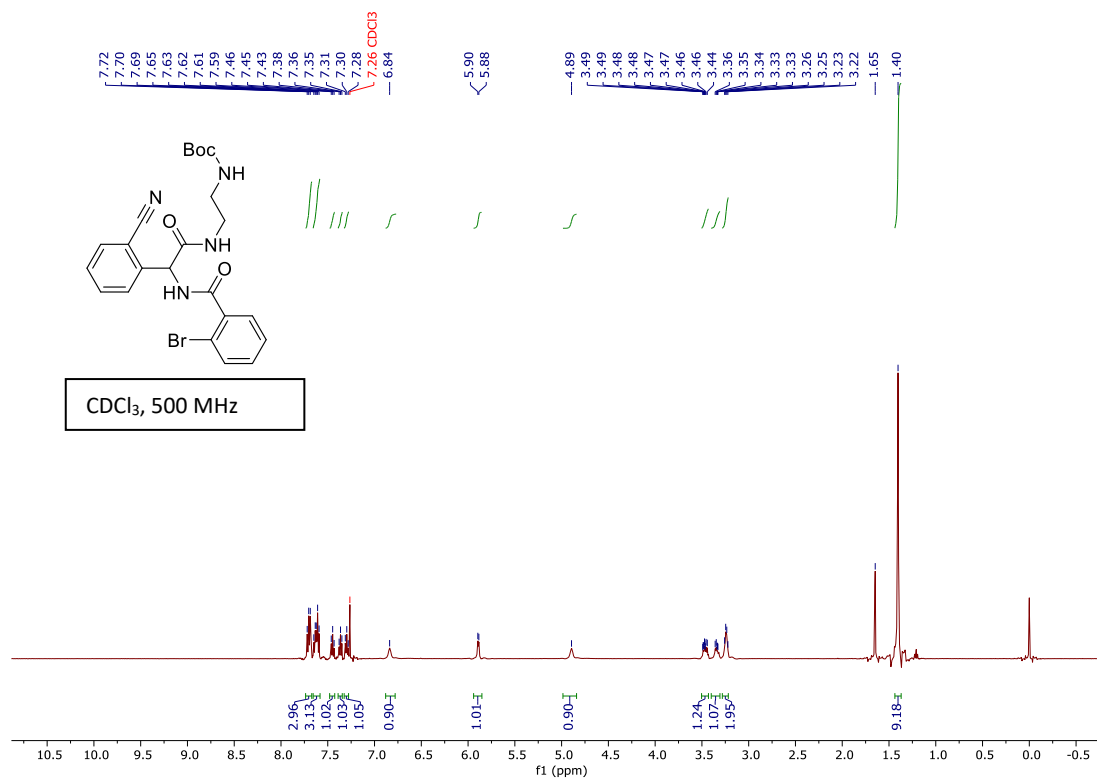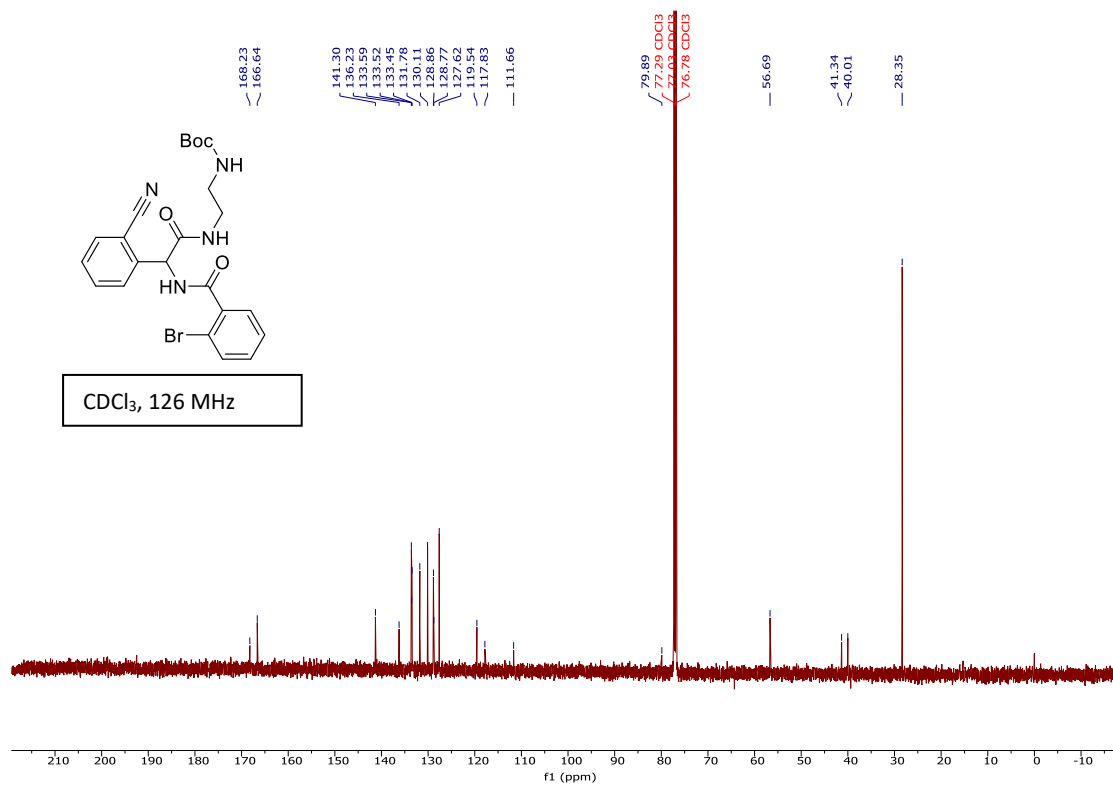

2-bromo-N-(2-((3-cyanobenzyl)amino)-1-(2-cyanophenyl)-2-oxoethyl)benzamide  
(22a)

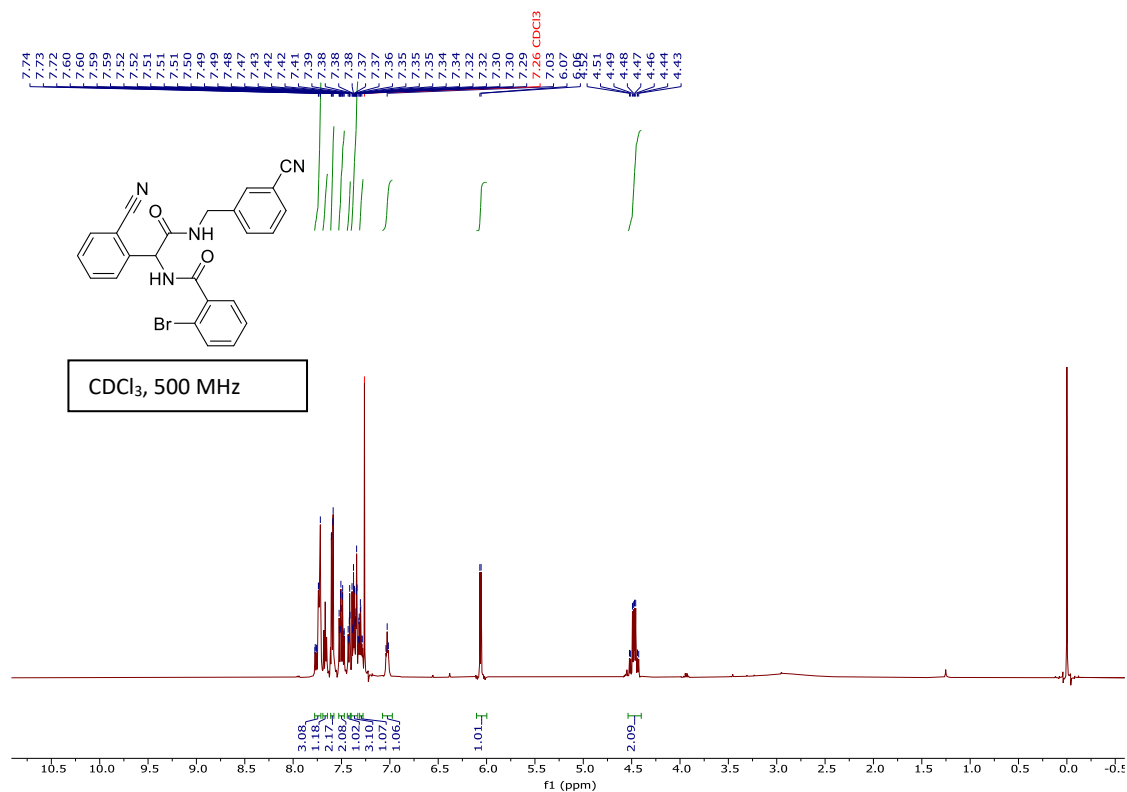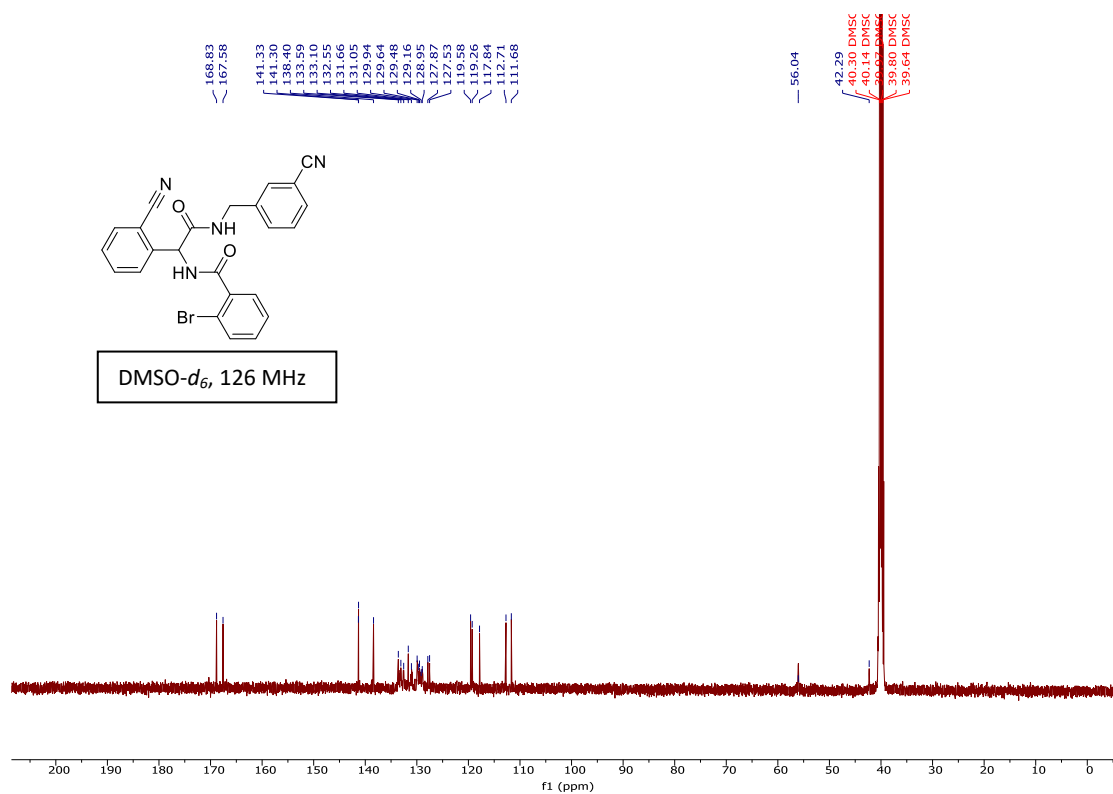

2-bromo-N-(2-((2-chloro-3,6-difluorobenzyl)amino)-1-(2-cyanophenyl)-2-oxoethyl) benzamide (**23a**)

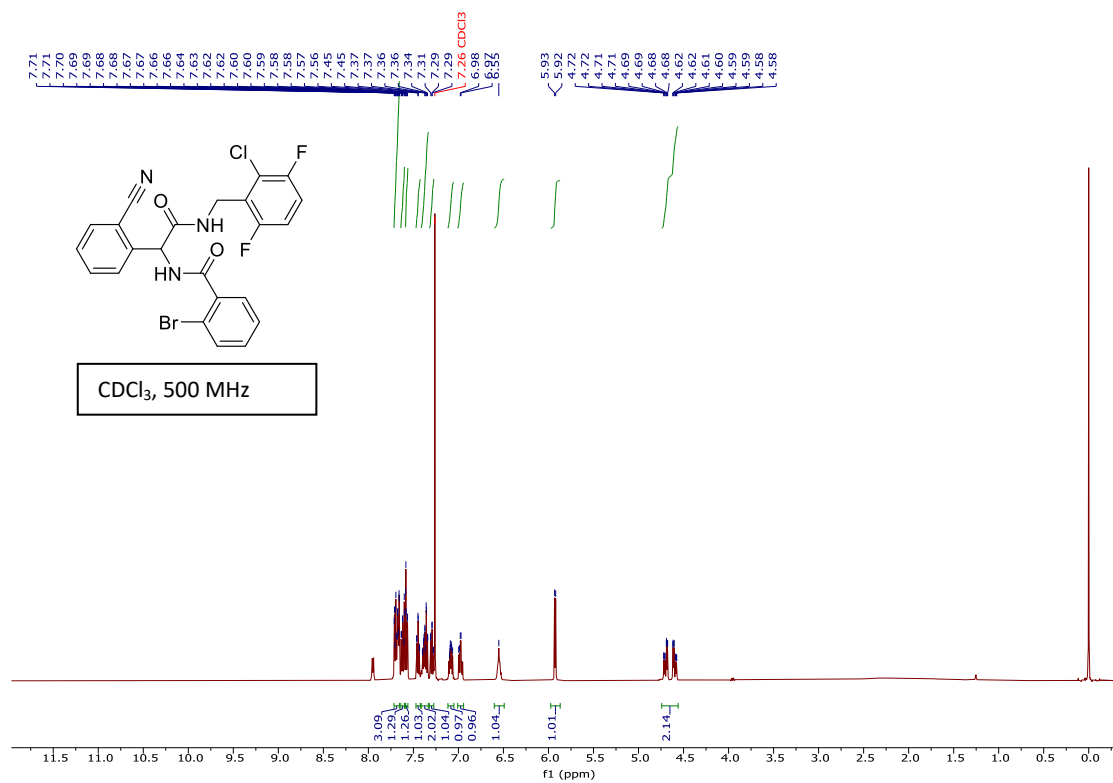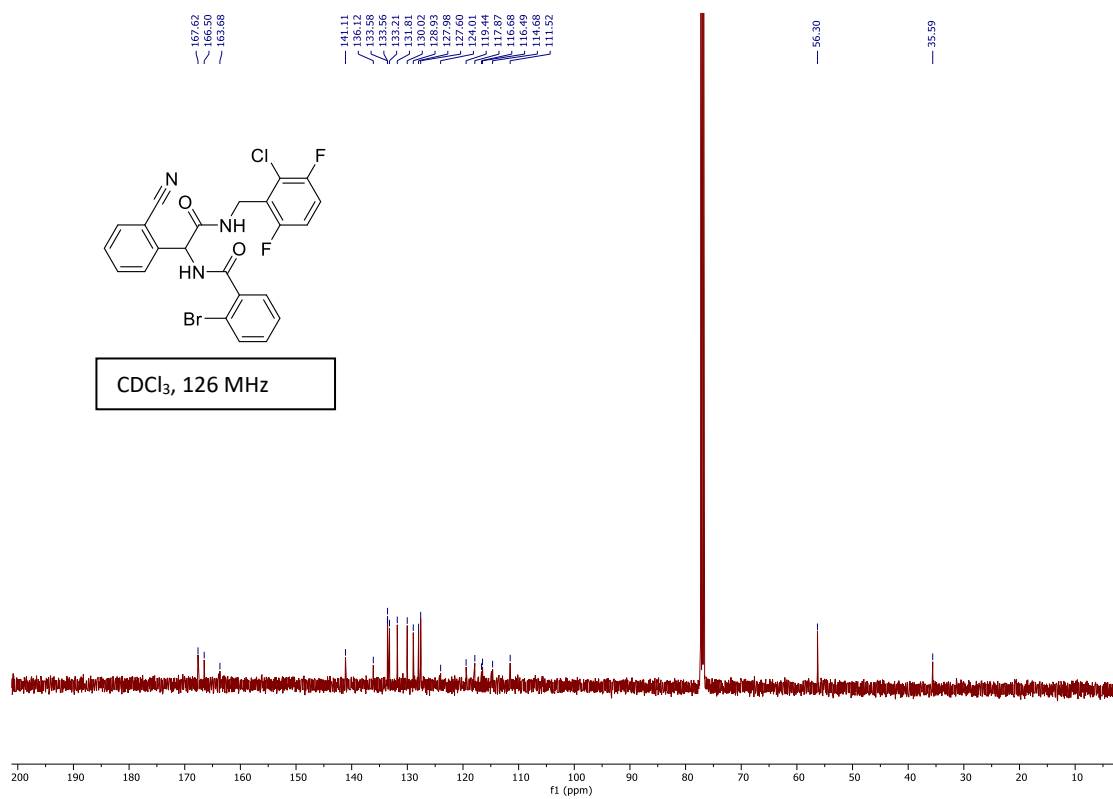

2-bromo-N-(1-(2-cyanophenyl)-2-oxo-2-((2-(trifluoromethoxy)benzyl)amino)ethyl)benzamide (**24a**)

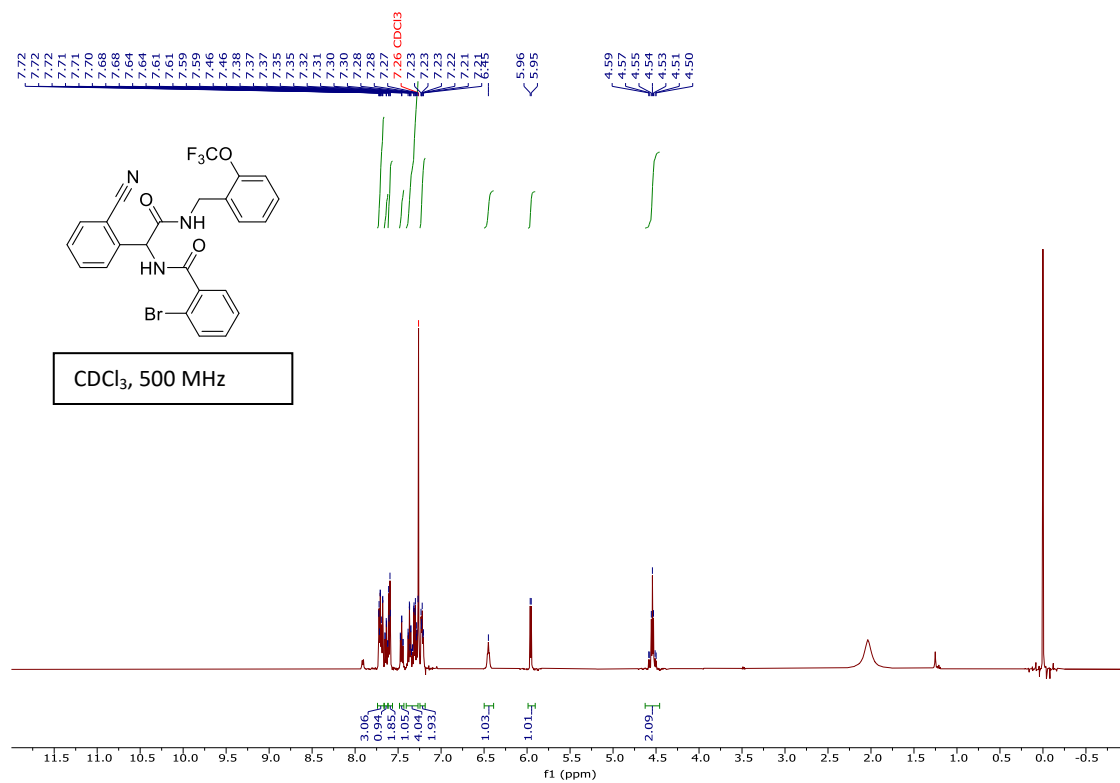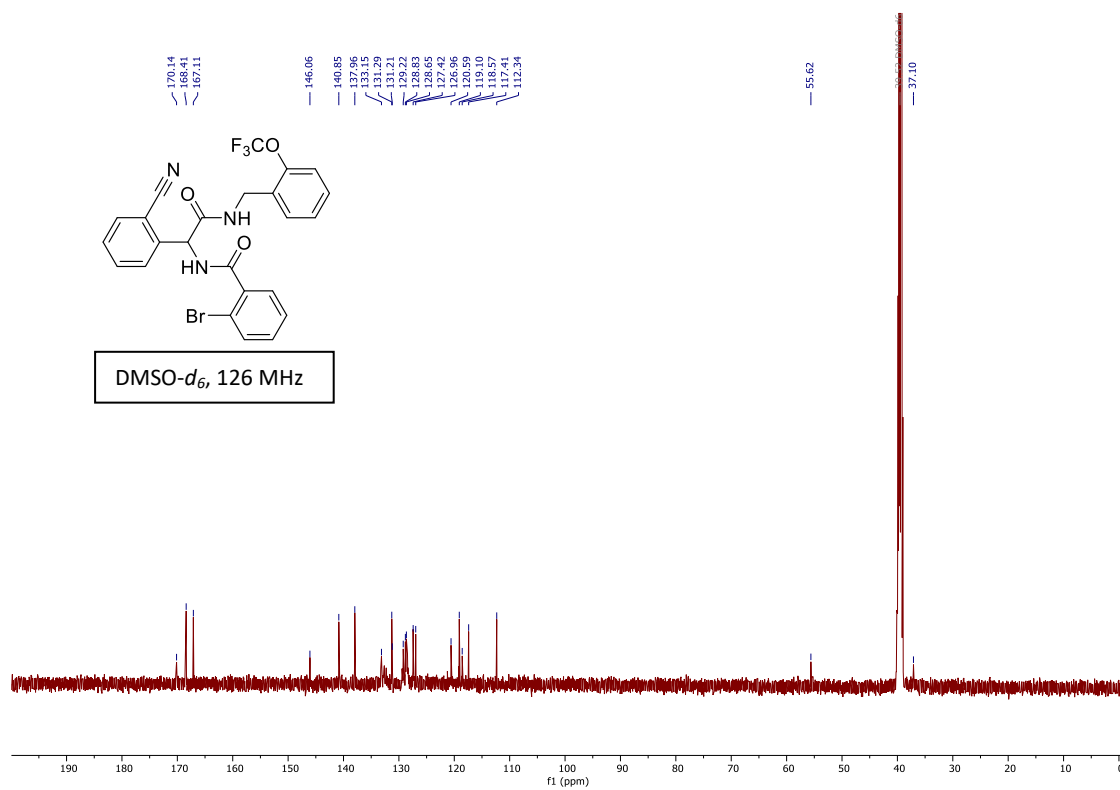



N-(2-(benzylamino)-1-(2-cyanophenyl)-2-oxoethyl)-2-bromo-4-methylbenzamide  
(25a)

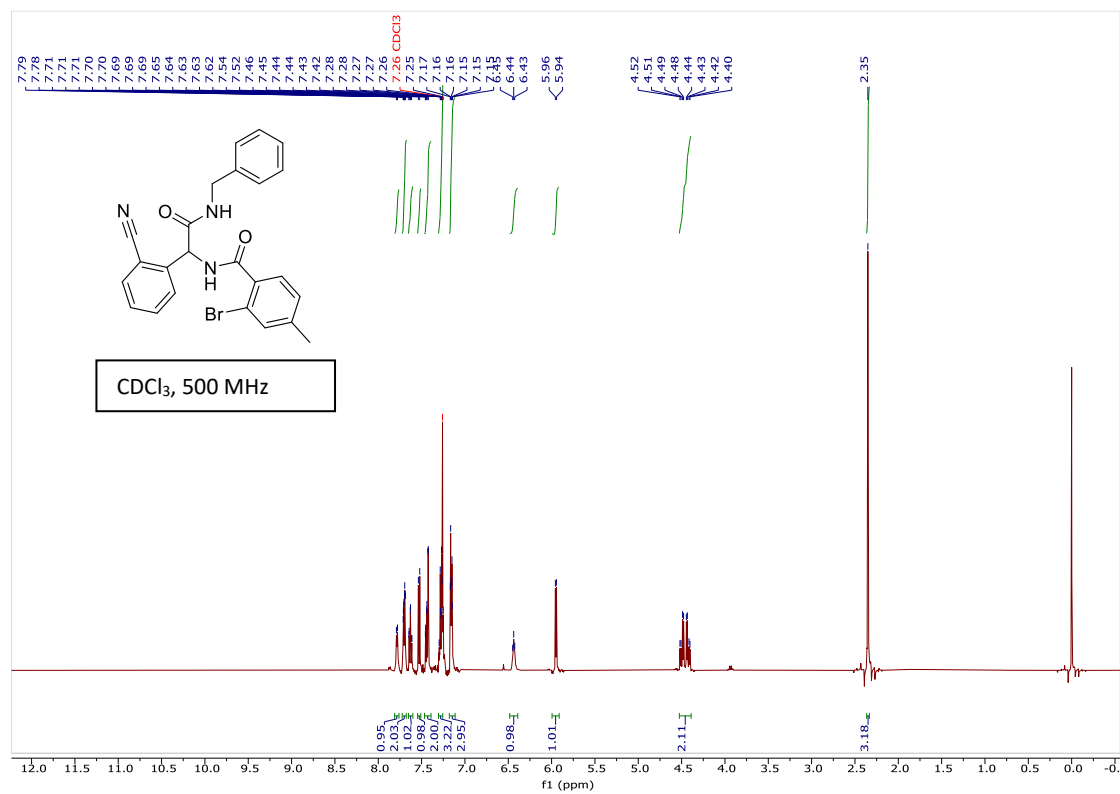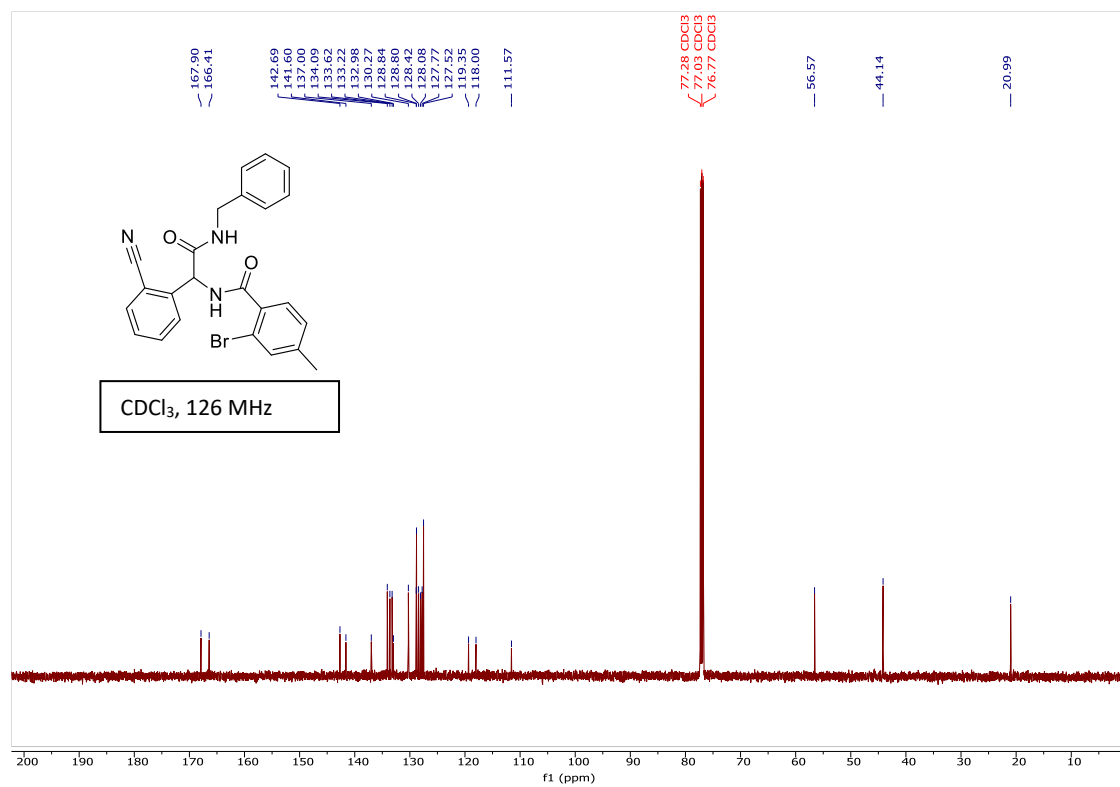

N-(2-(benzylamino)-1-(2-cyanophenyl)-2-oxoethyl)-2-bromothiophene-3-carboxamide (**26a**)

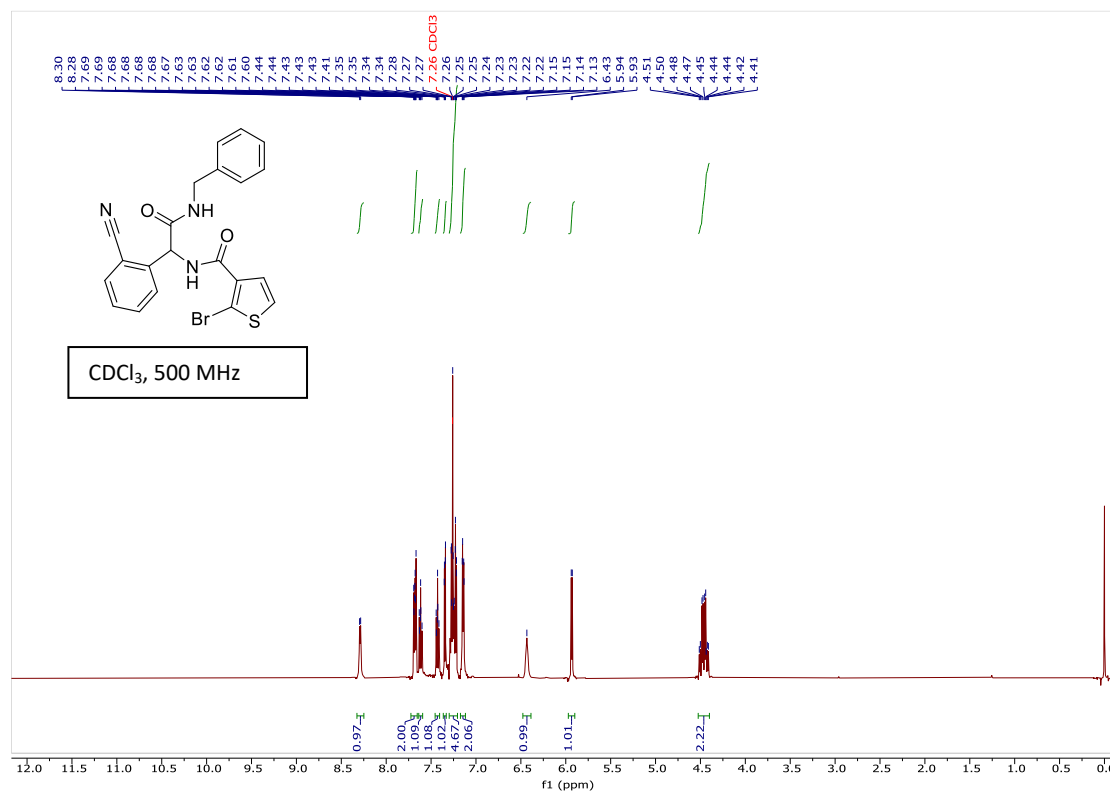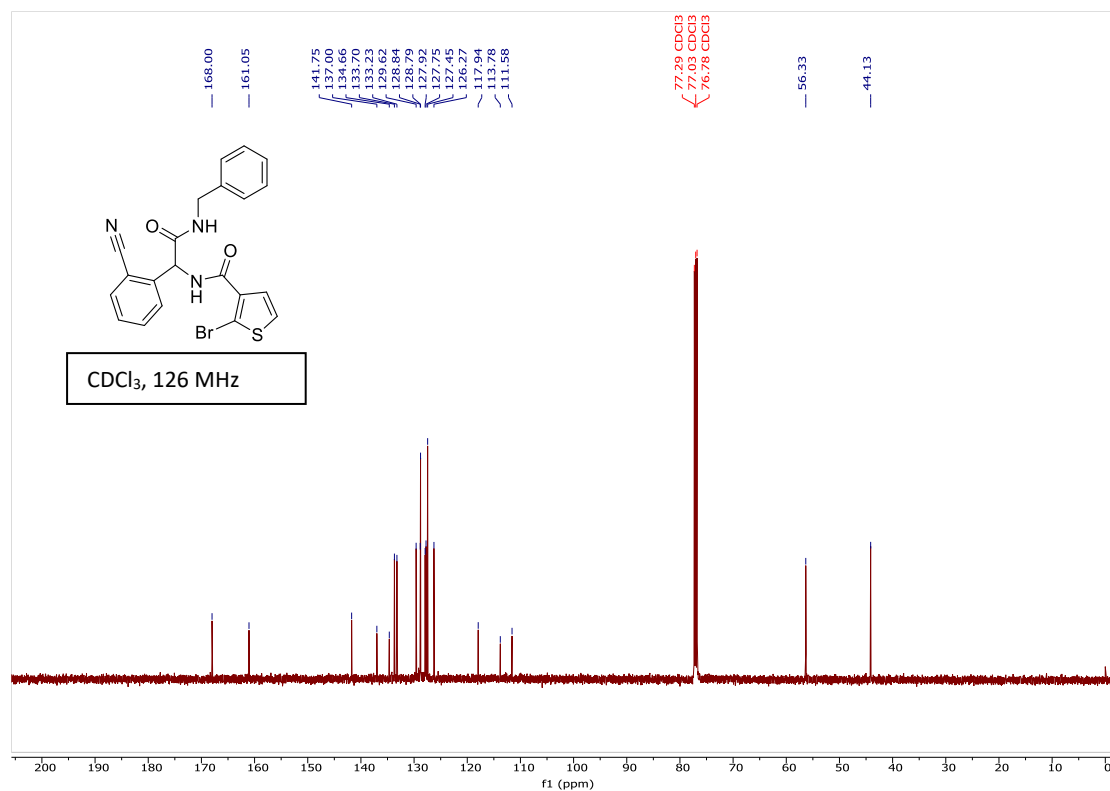

N-(2-(benzylamino)-1-(2-cyanophenyl)-2-oxoethyl)-4-bromo-2-iodobenzamide (27a)

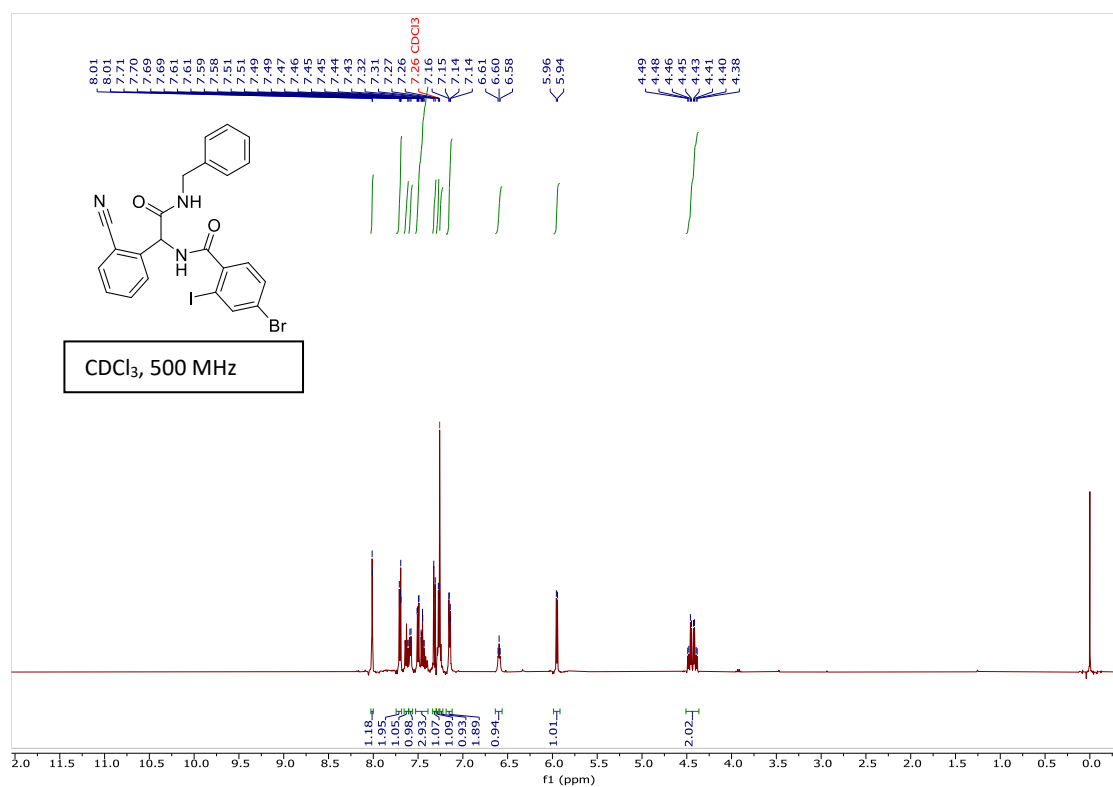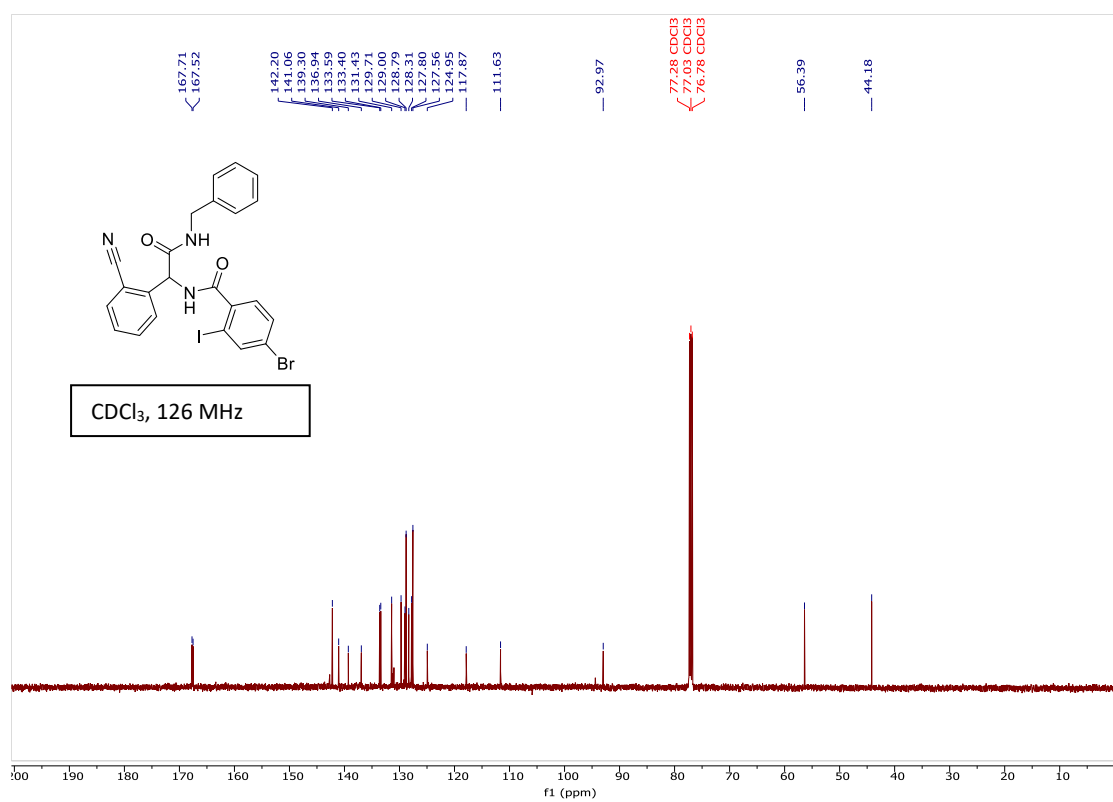

N-(2-(benzylamino)-1-(2-cyanophenyl)-2-oxoethyl)-2-bromo-5-methylbenzamide  
(28a)

(28a)

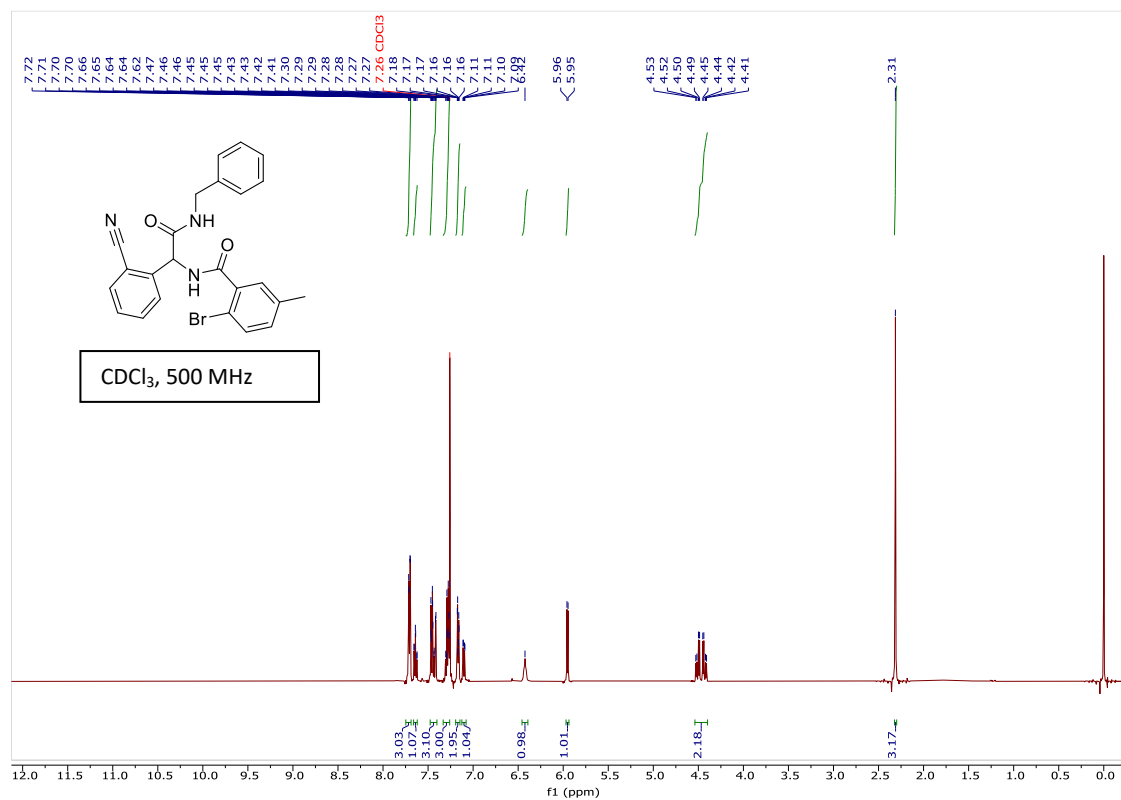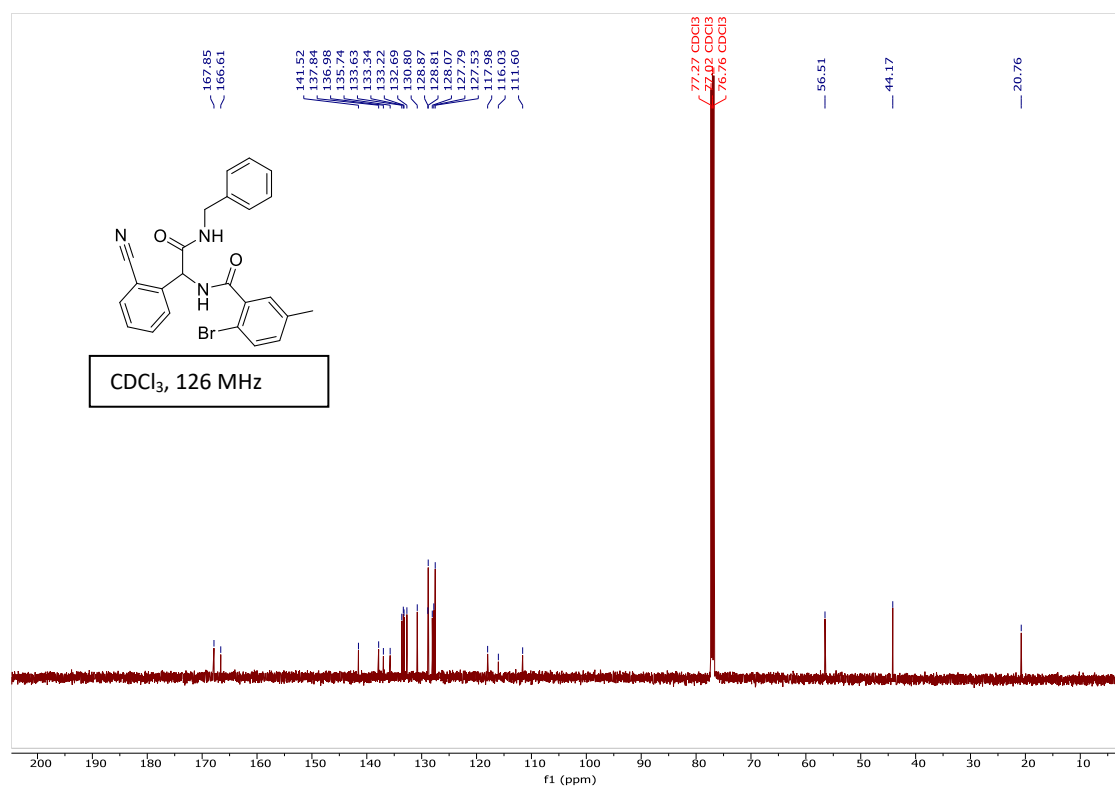

N-(2-(benzylamino)-1-(2-cyanophenyl)-2-oxoethyl)-4-bromonicotinamide (29a)

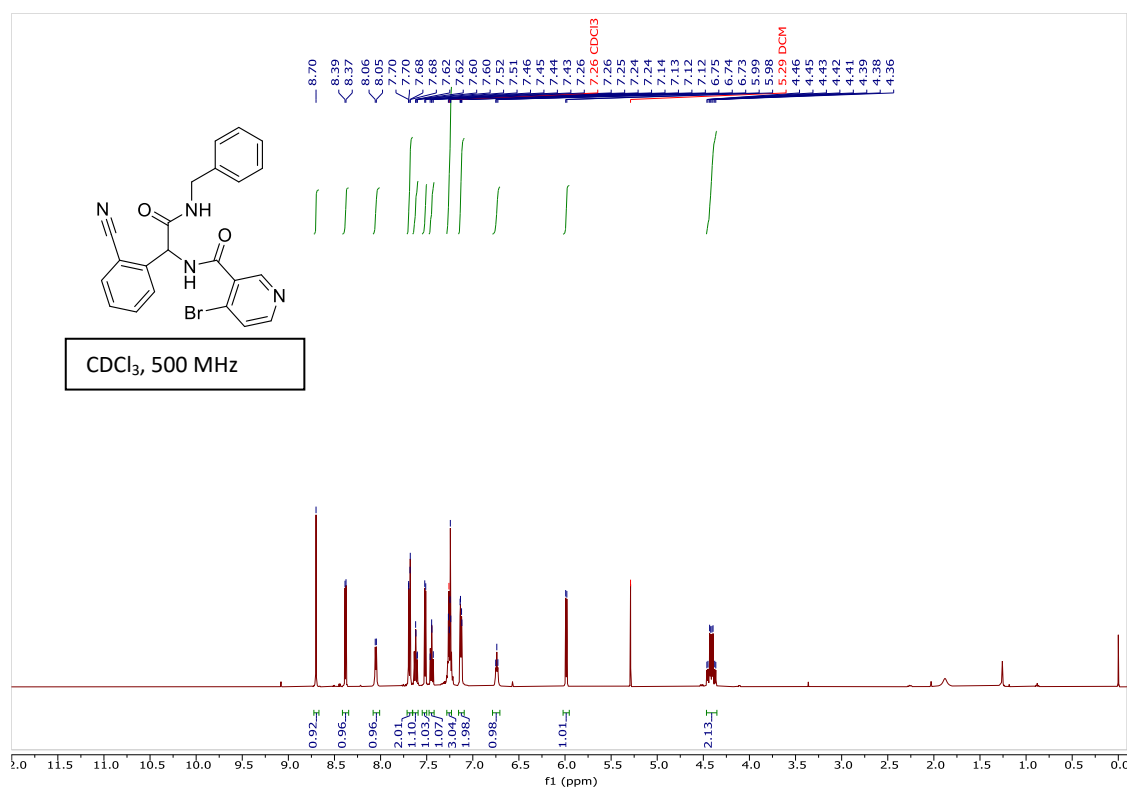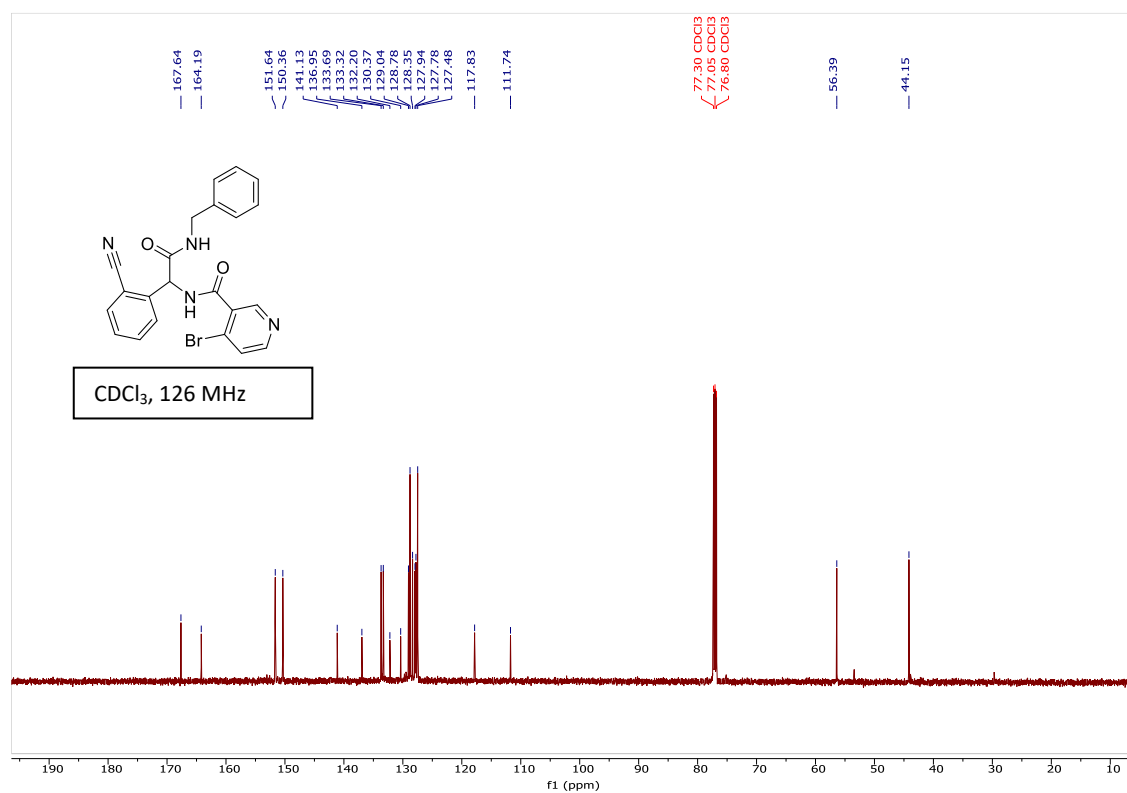

N-(2-(benzylamino)-1-(2-cyanophenyl)-2-oxoethyl)-1-bromo-2-naphthamide (**30a**)

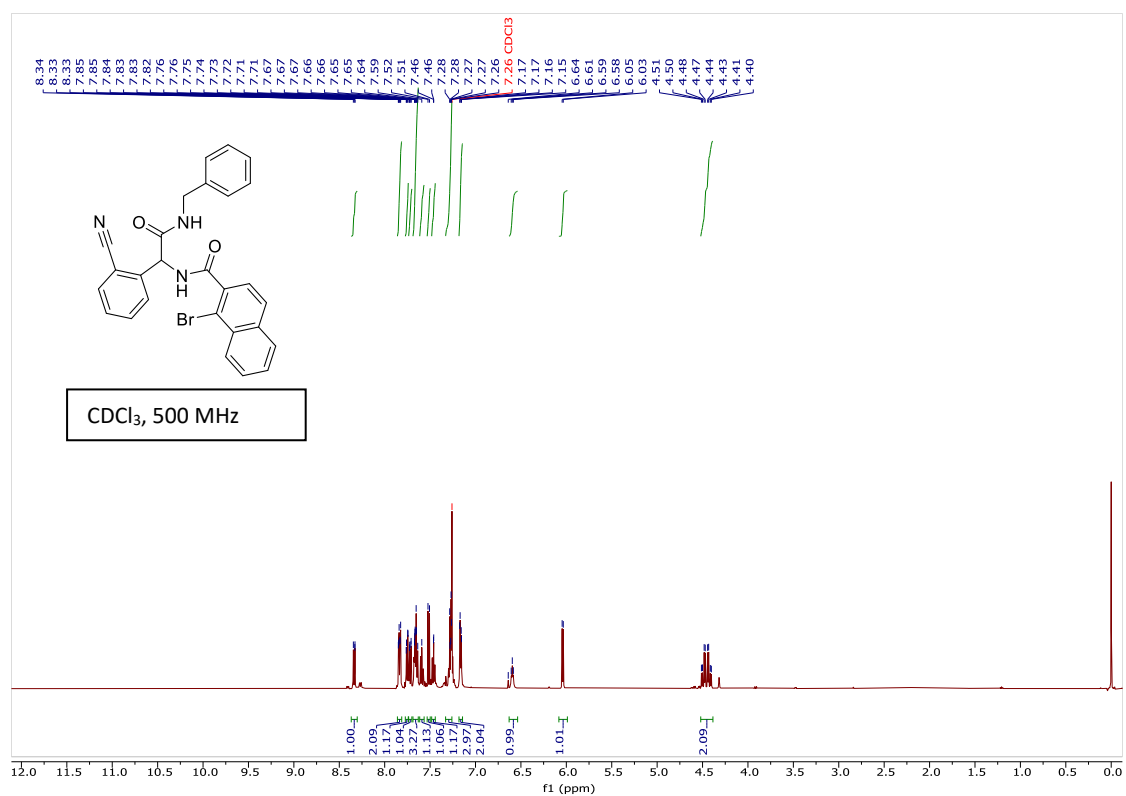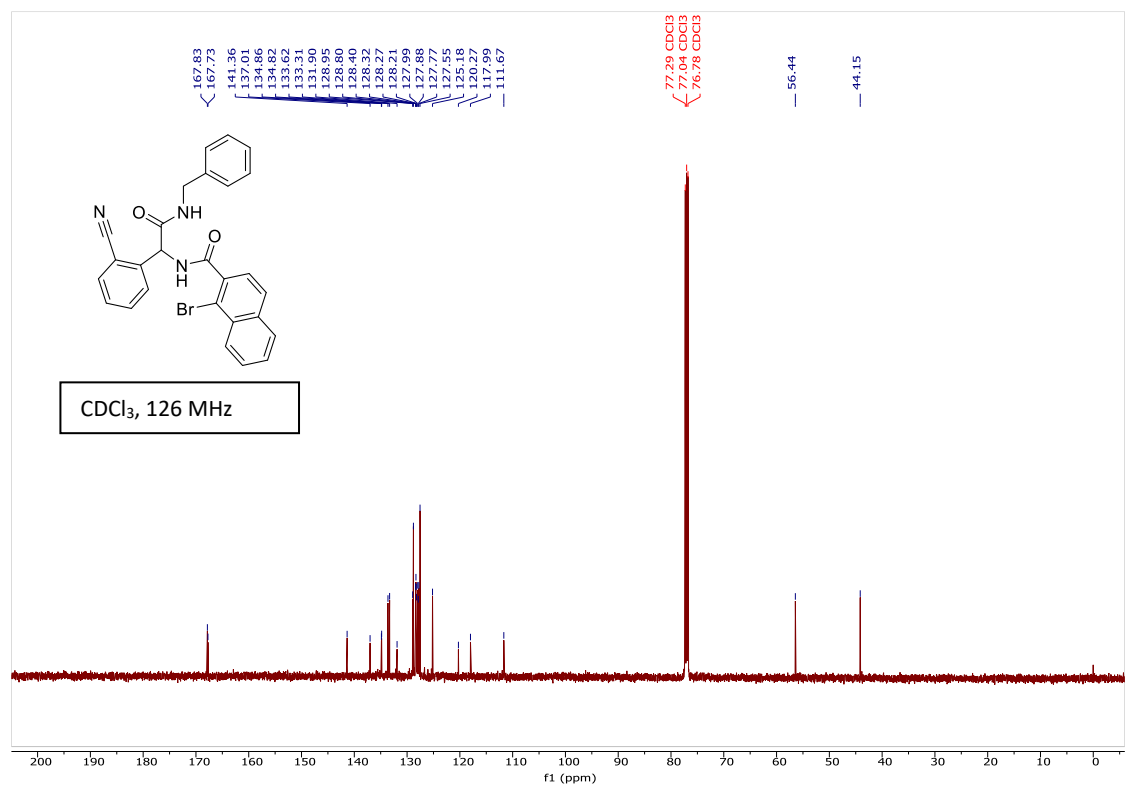

N-(2-(benzylamino)-1-(2-cyanophenyl)-2-oxoethyl)-3-bromoisonicotinamide (**31a**)

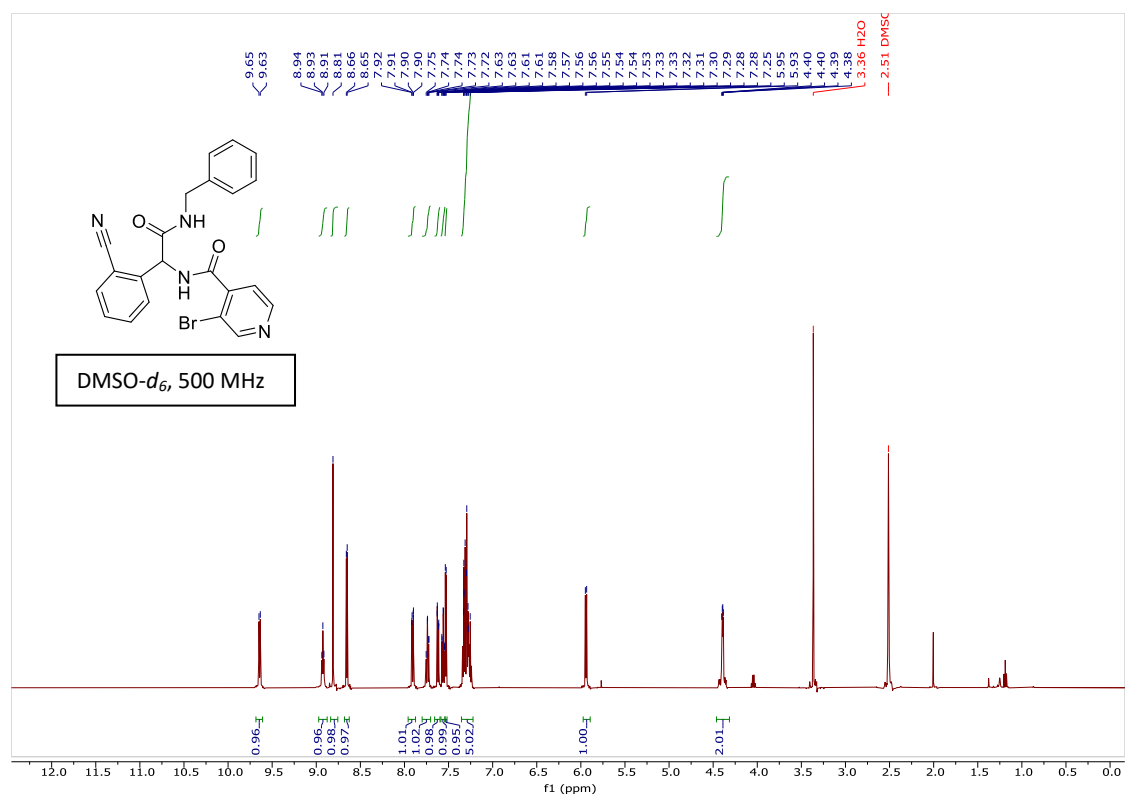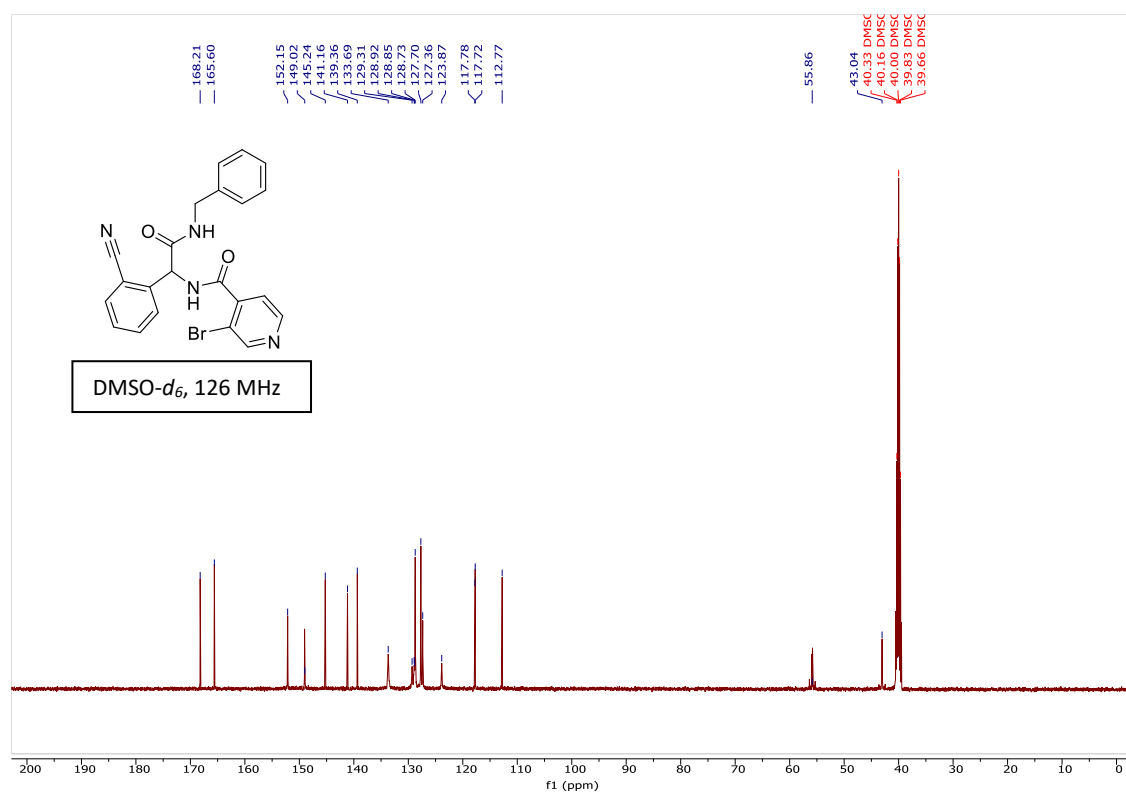

N-(2-(benzylamino)-1-(2-cyano-4-methoxyphenyl)-2-oxoethyl)-2-bromobenzamide  
(32a)

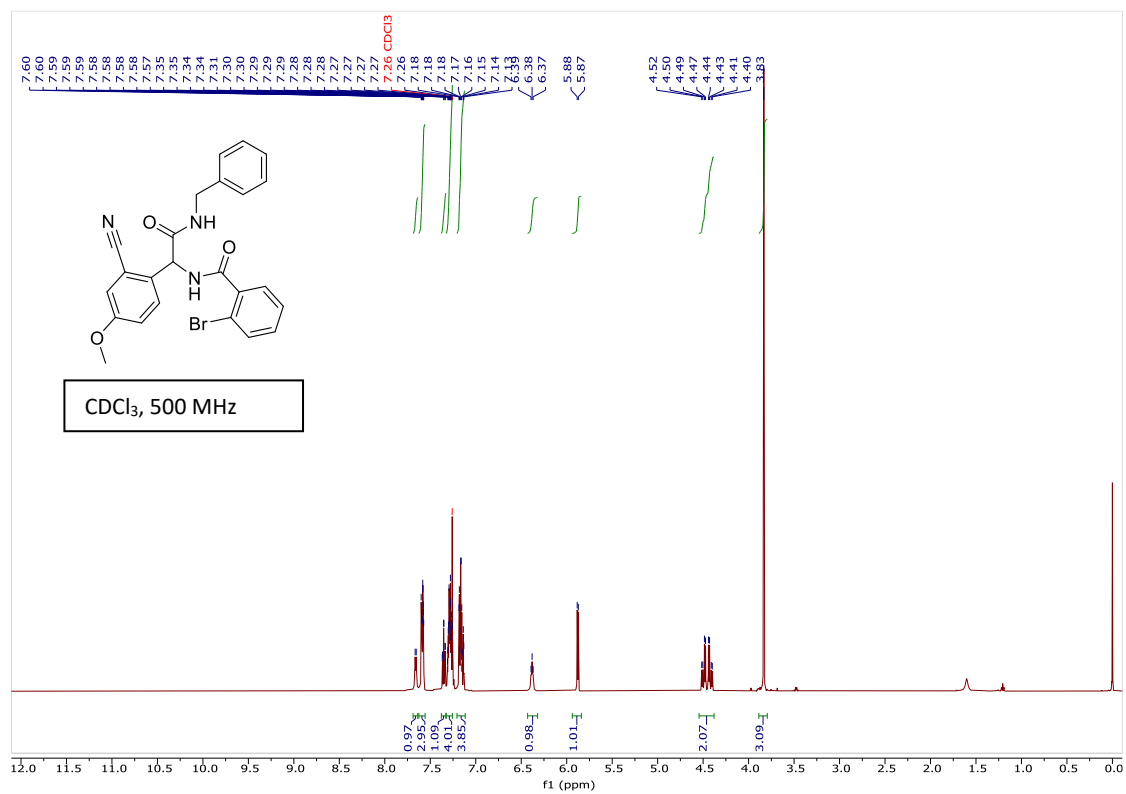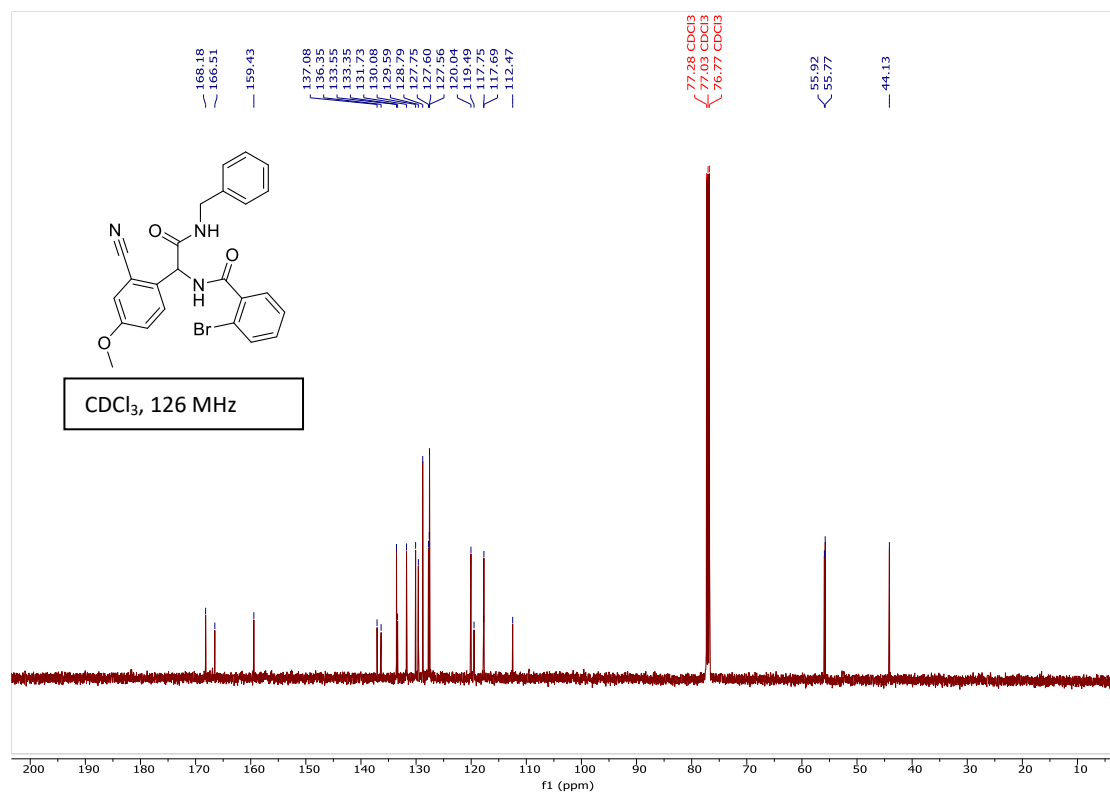



N-(2-(benzylamino)-1-(2-cyano-4-fluorophenyl)-2-oxoethyl)-2-bromobenzamide (**33a**)

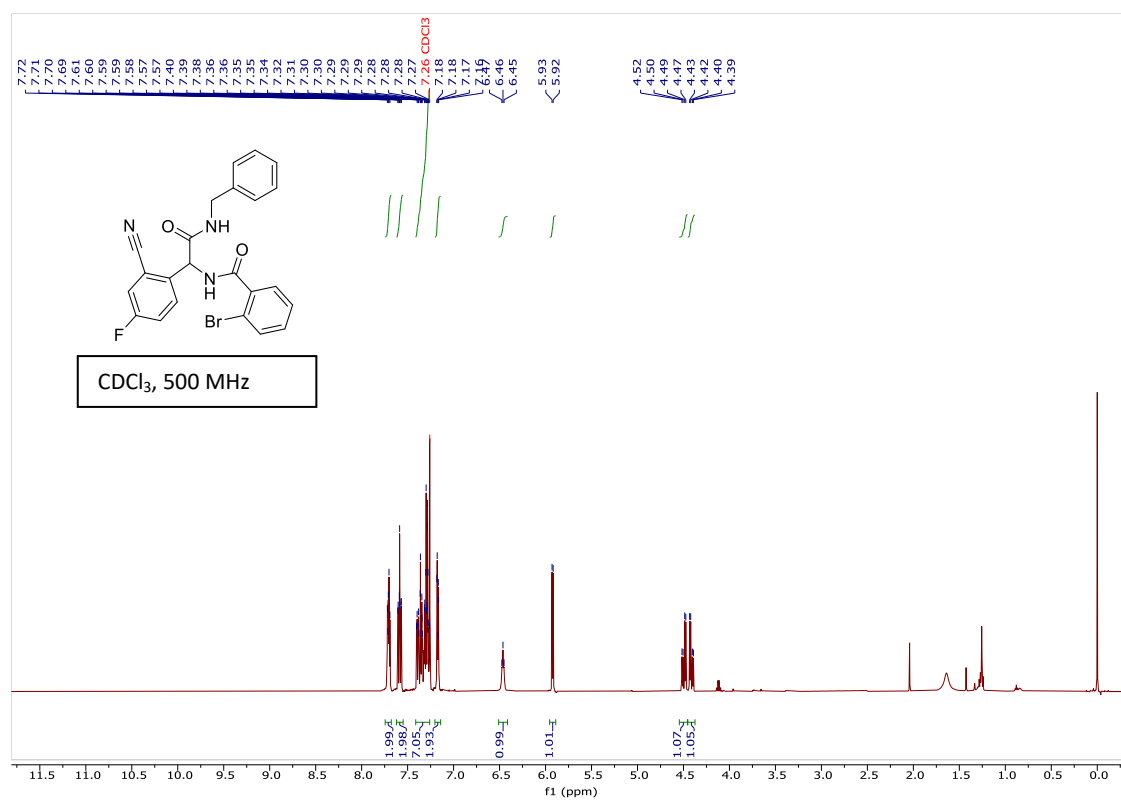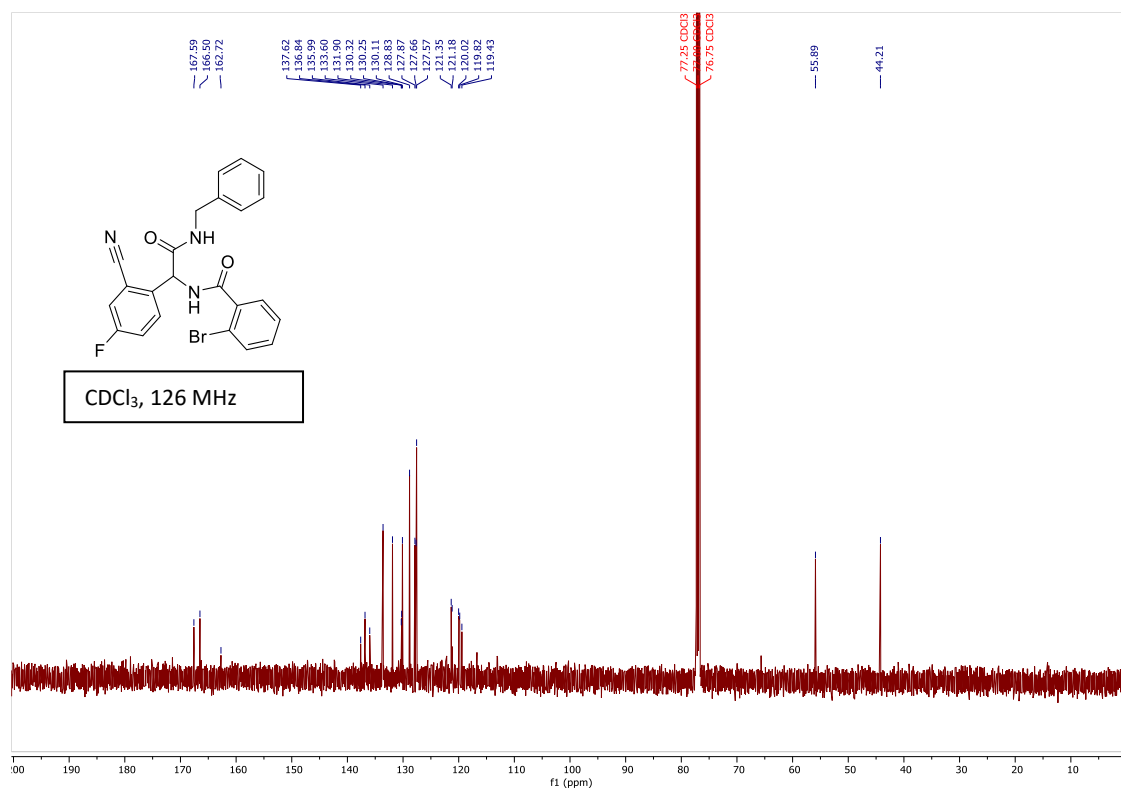

2-bromo-N-(2-((2-chloro-6-fluoro-3-methylbenzyl)amino)-1-(2-cyanophenyl)-2-oxoethyl)benzamide (**34a**)

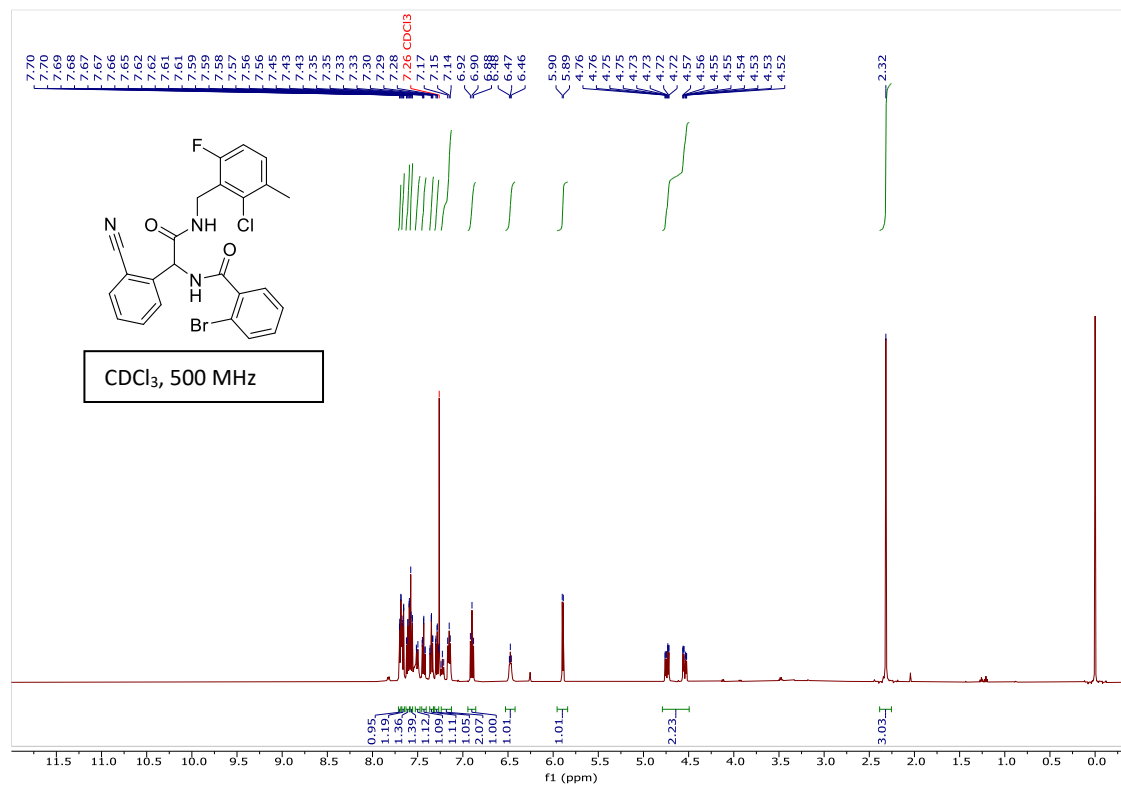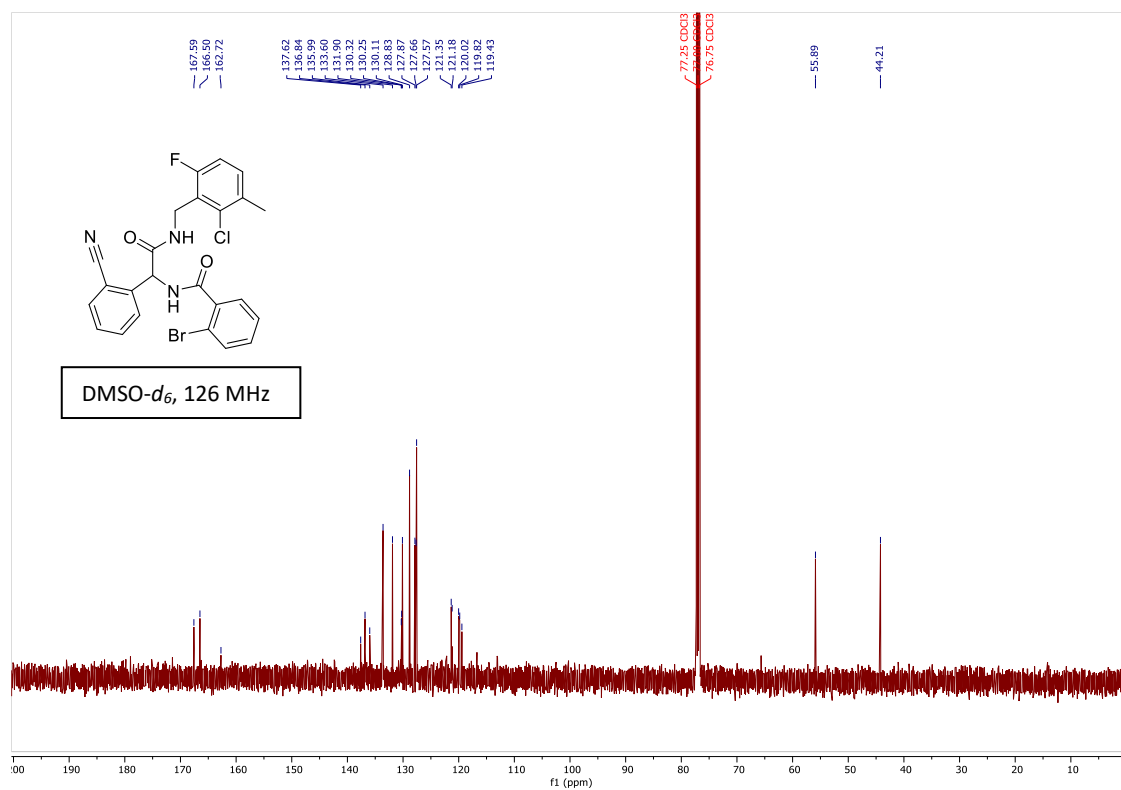

N-(2-(benzylamino)-1-(2-cyanoquinolin-3-yl)-2-oxoethyl)-2-bromobenzamide (**35a**)

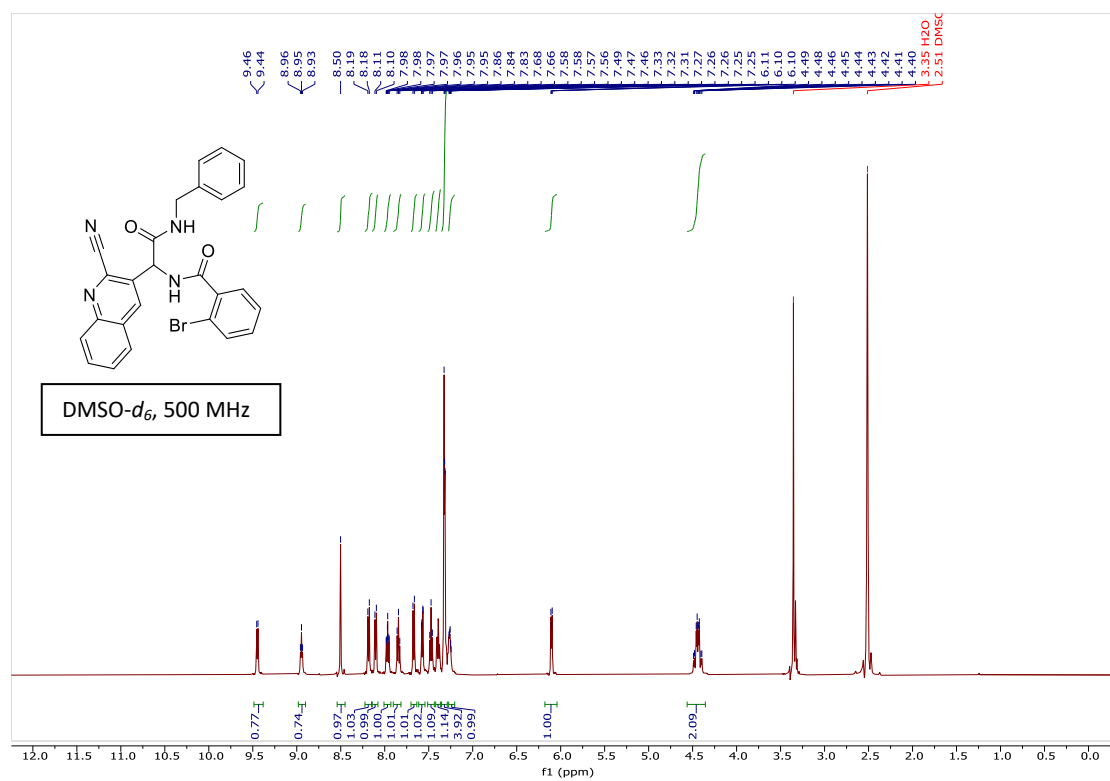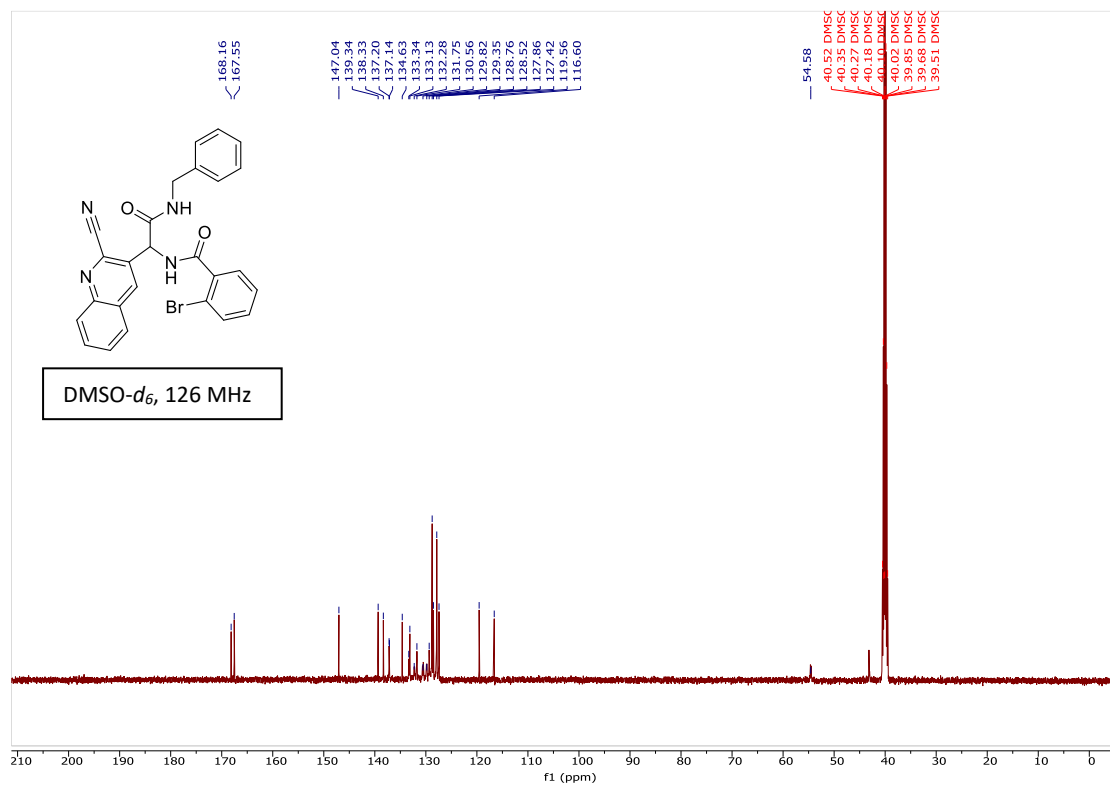

N-cyano-N-(2-(cyclohexylamino)-1-(2-iodophenyl)-2-oxoethyl)benzamide (39a)

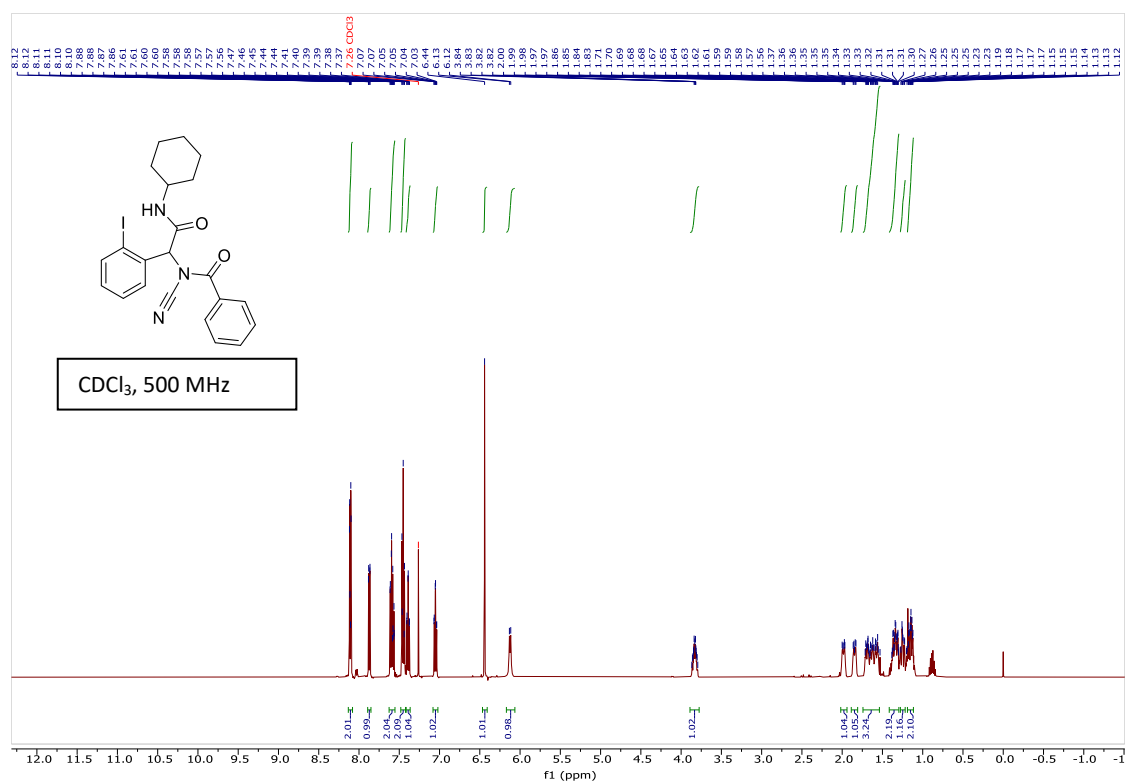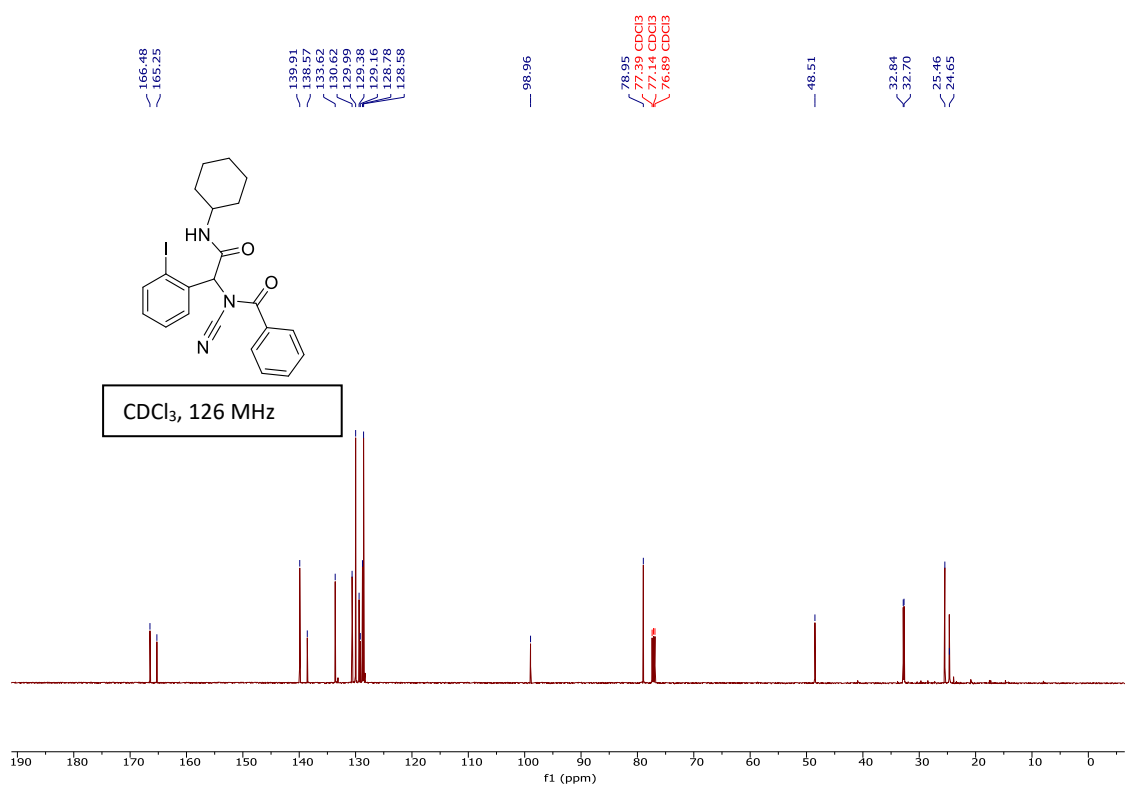

N-(2-(benzylamino)-1-(2-iodophenyl)-2-oxoethyl)-N-cyanobenzamide (40a)

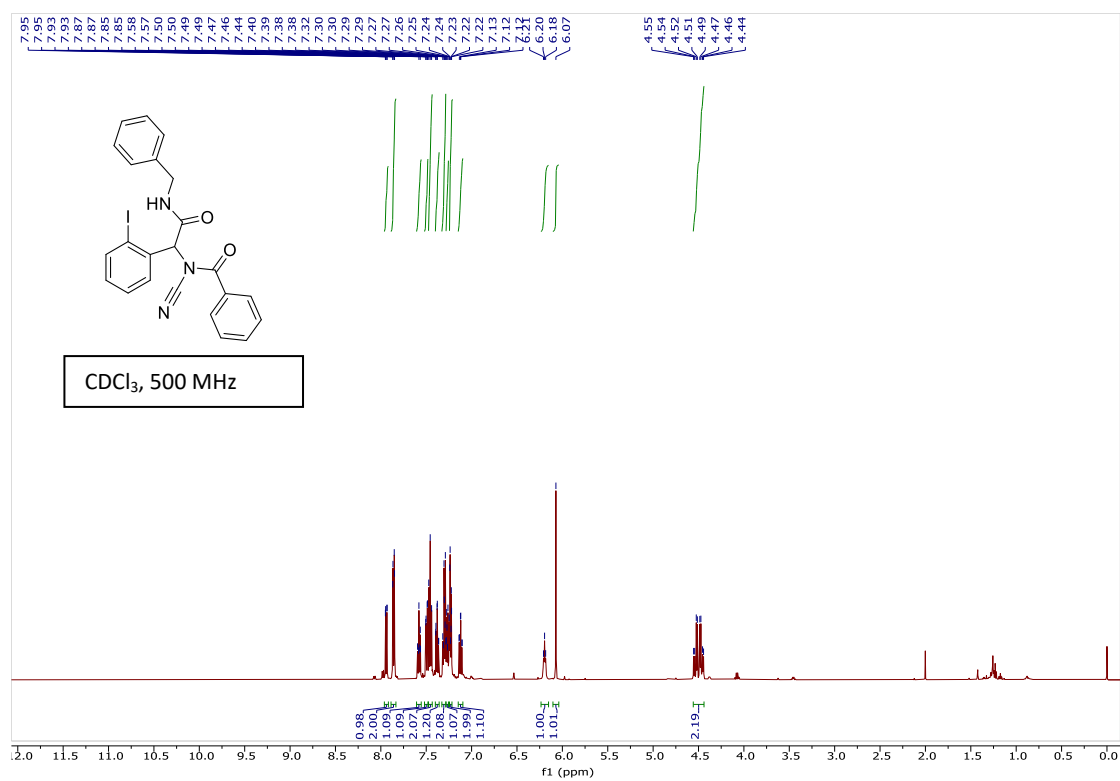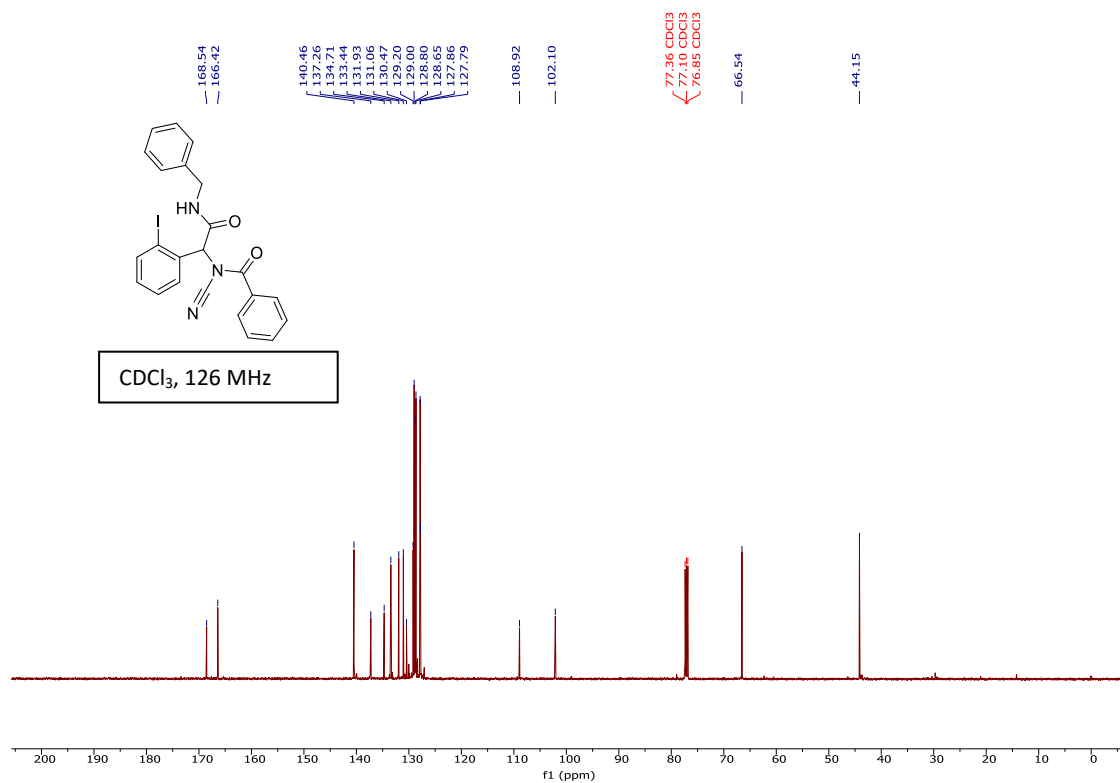

N-cyano-N-(1-(2-iodophenyl)-2-oxo-2-(((tetrahydrofuran-2-yl)methyl)amino)ethyl)benzamide (**41a**)

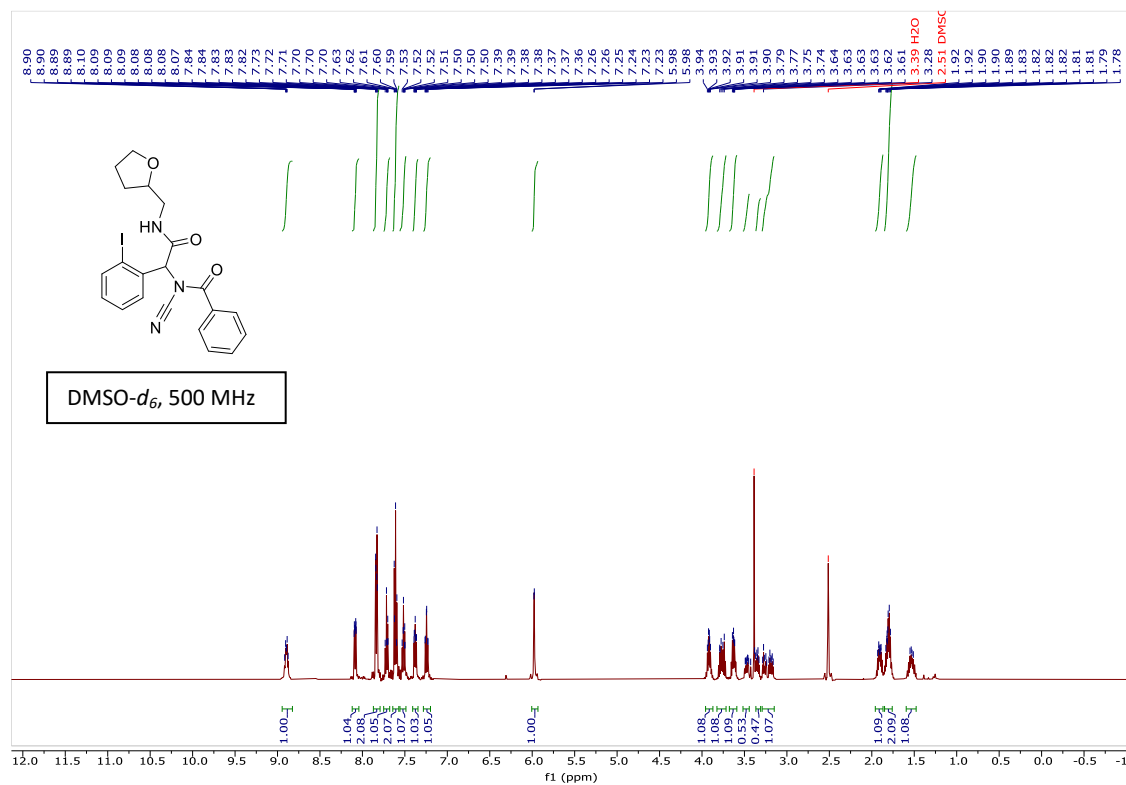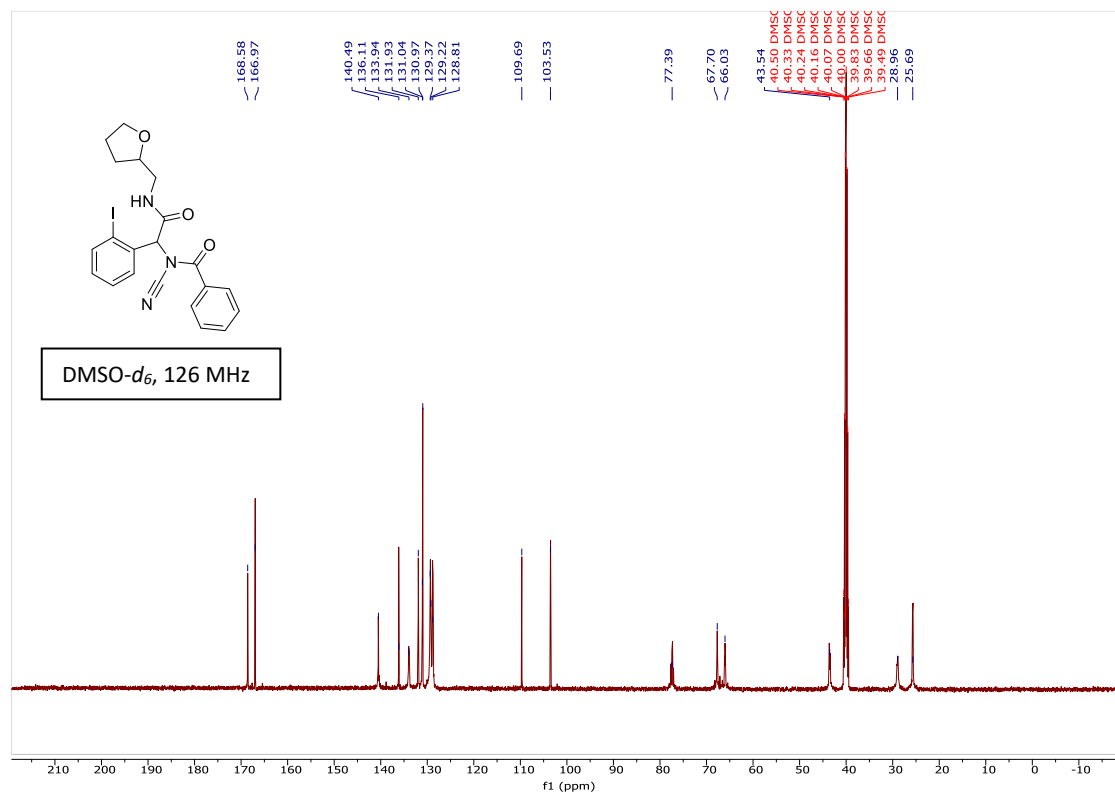

# $^1\text{H}$ NMR & $^{13}\text{C}\{^1\text{H}\}$ NMR chromatograms of cyclization products

N-cyclohexyl-10-oxo-10,12-dihydroisindolo[1,2-b]quinazoline-12-carboxamide (**10b**)

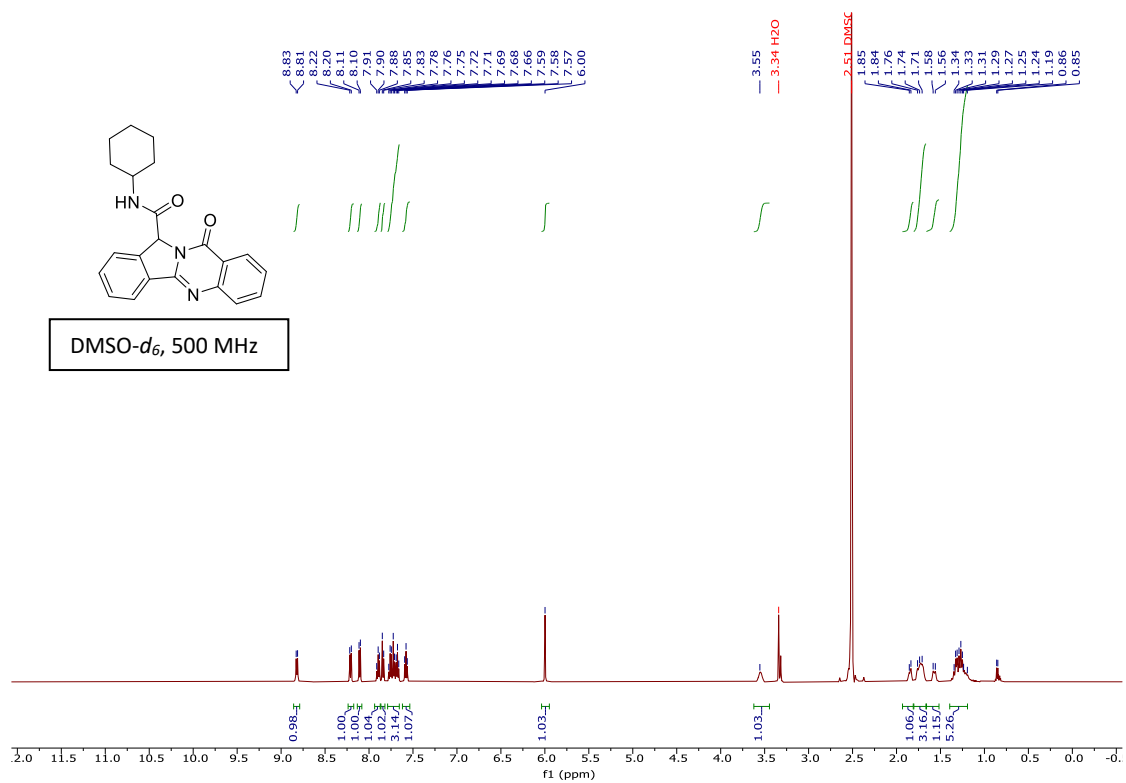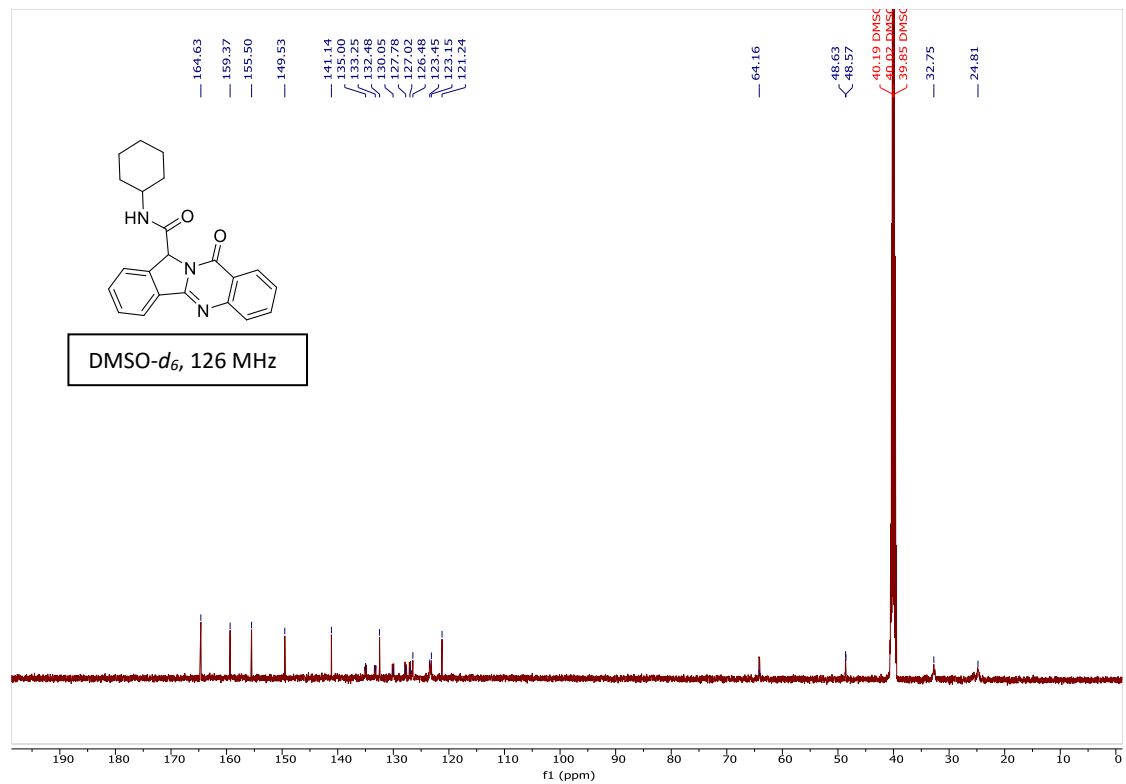

N-benzyl-10-oxo-10,12-dihydroisindolo[1,2-b]quinazoline-12-carboxamide (**11b**)

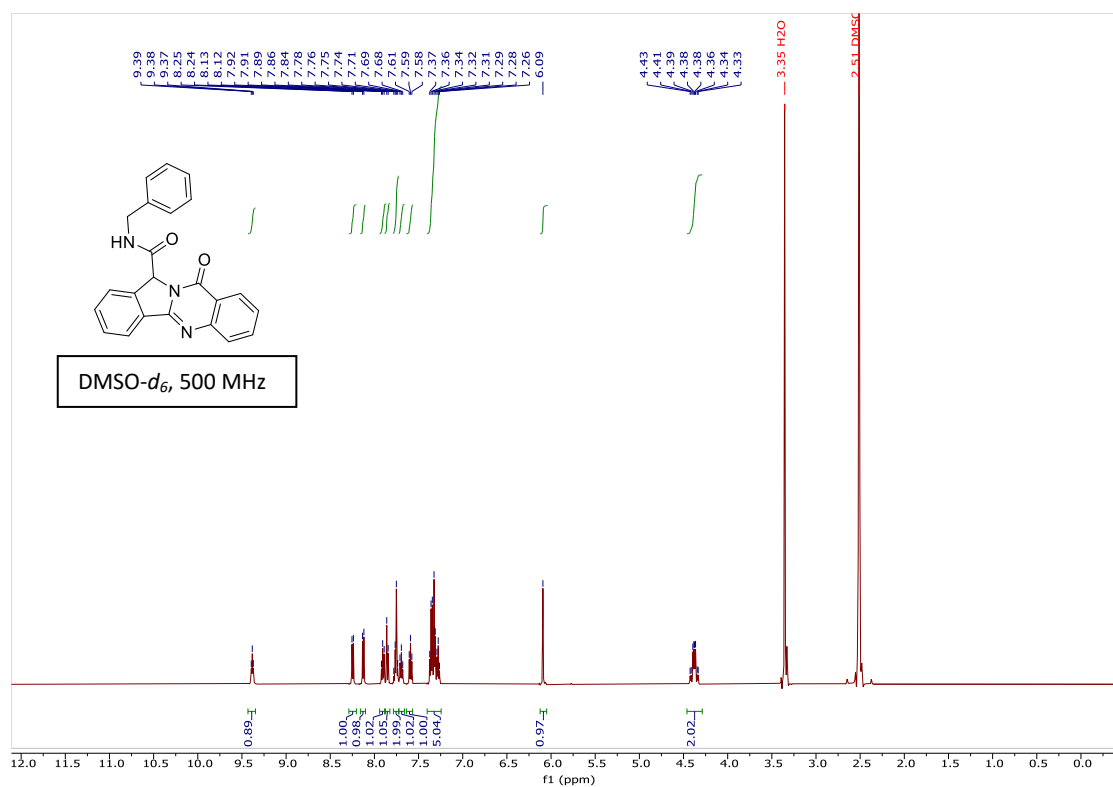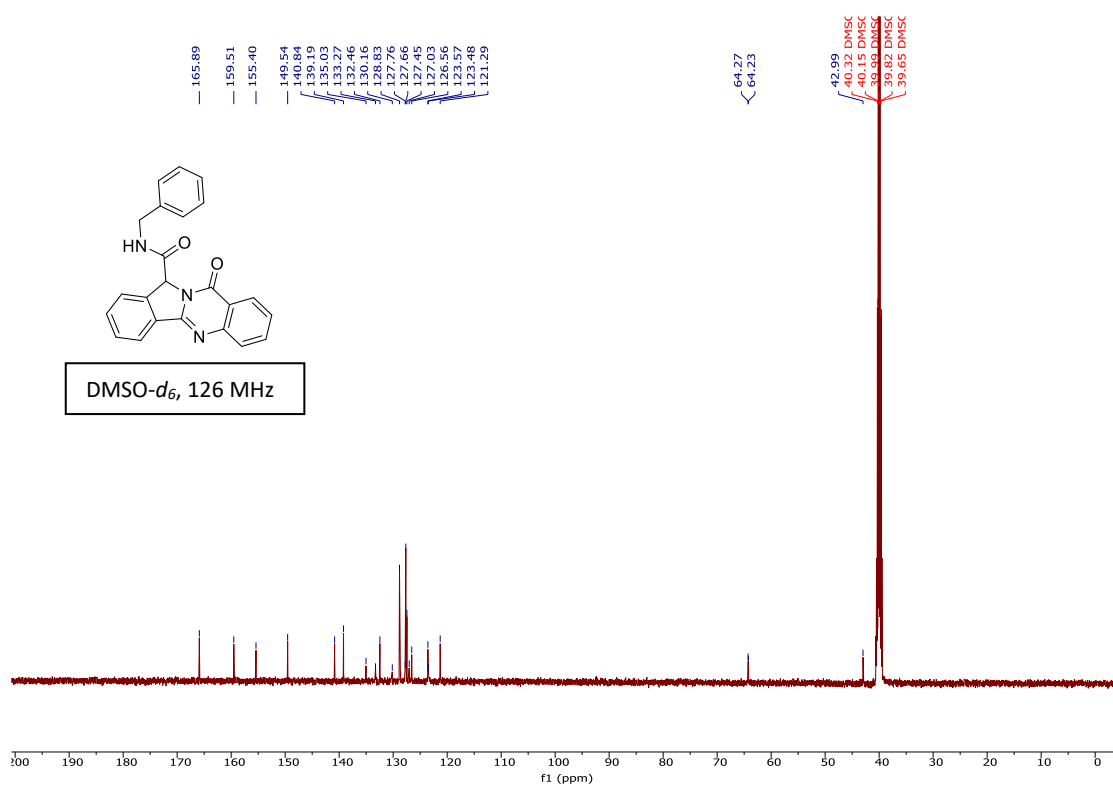



10-oxo-N-phenethyl-10,12-dihydroisoindolo[1,2-b]quinazoline-12-carboxamide (**12b**)

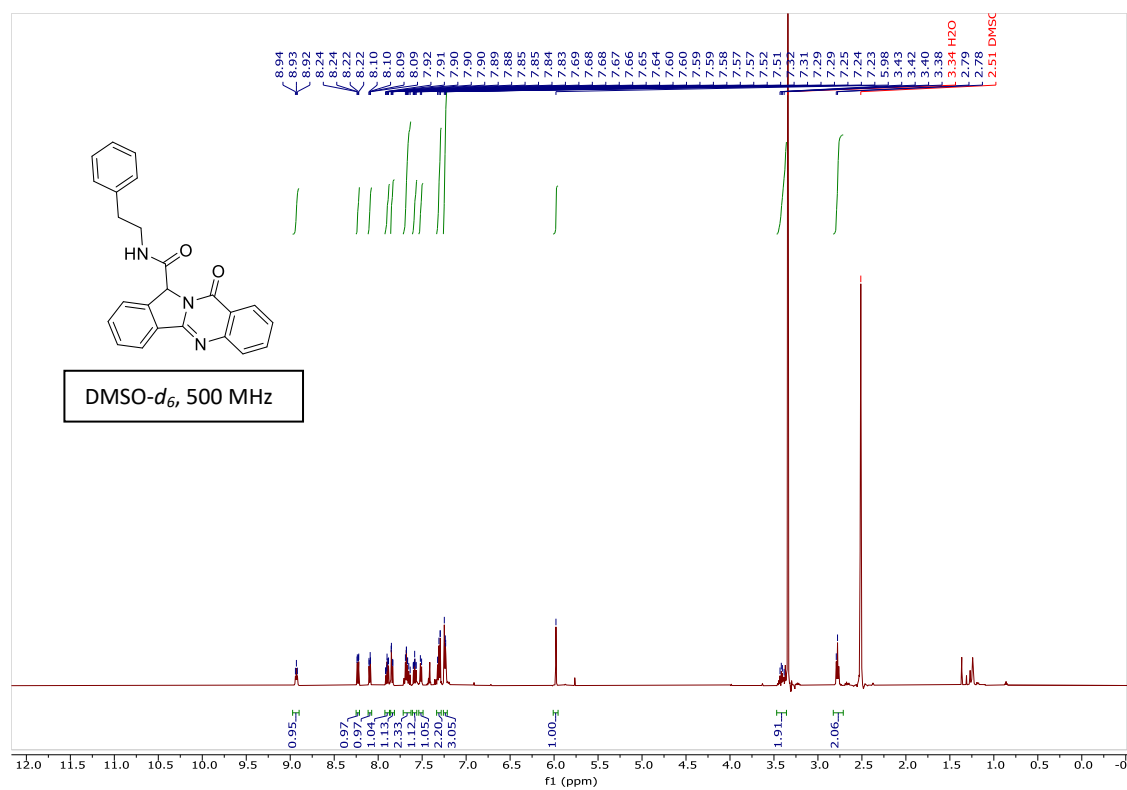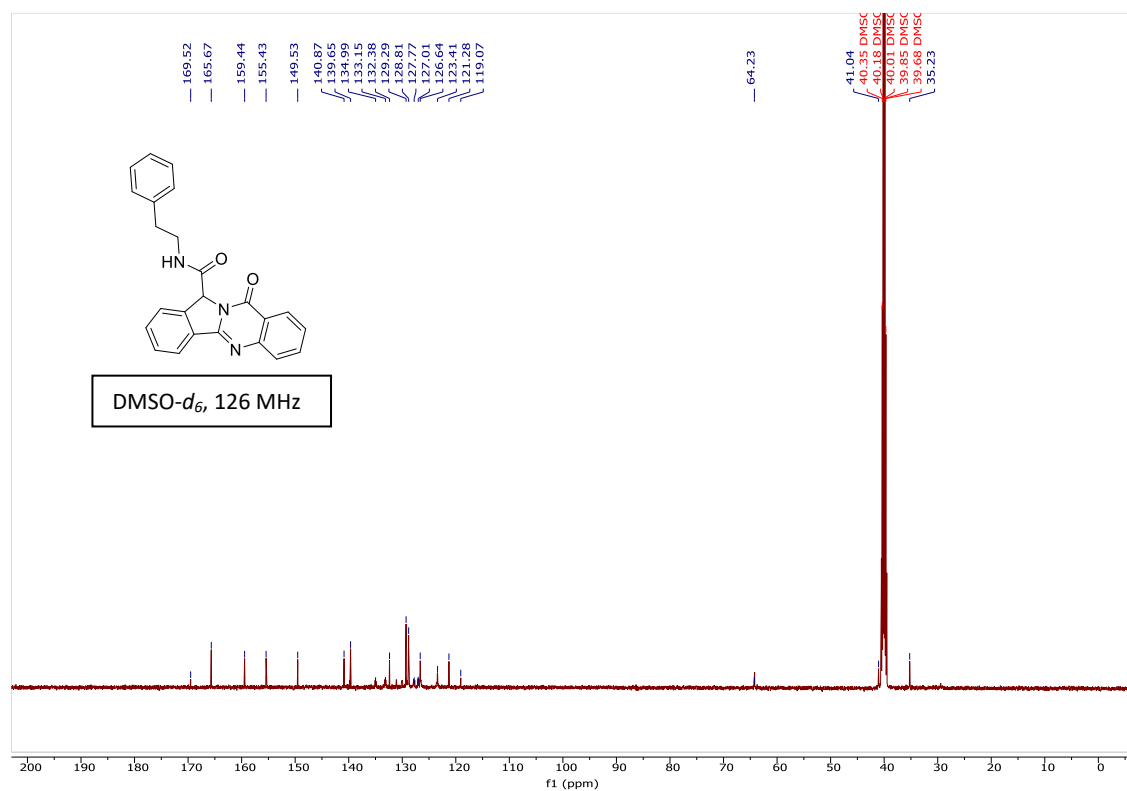

N-(4-chlorophenyl)-10-oxo-10,12-dihydroisoindolo[1,2-b]quinazoline-12-carboxamide (**13b**)

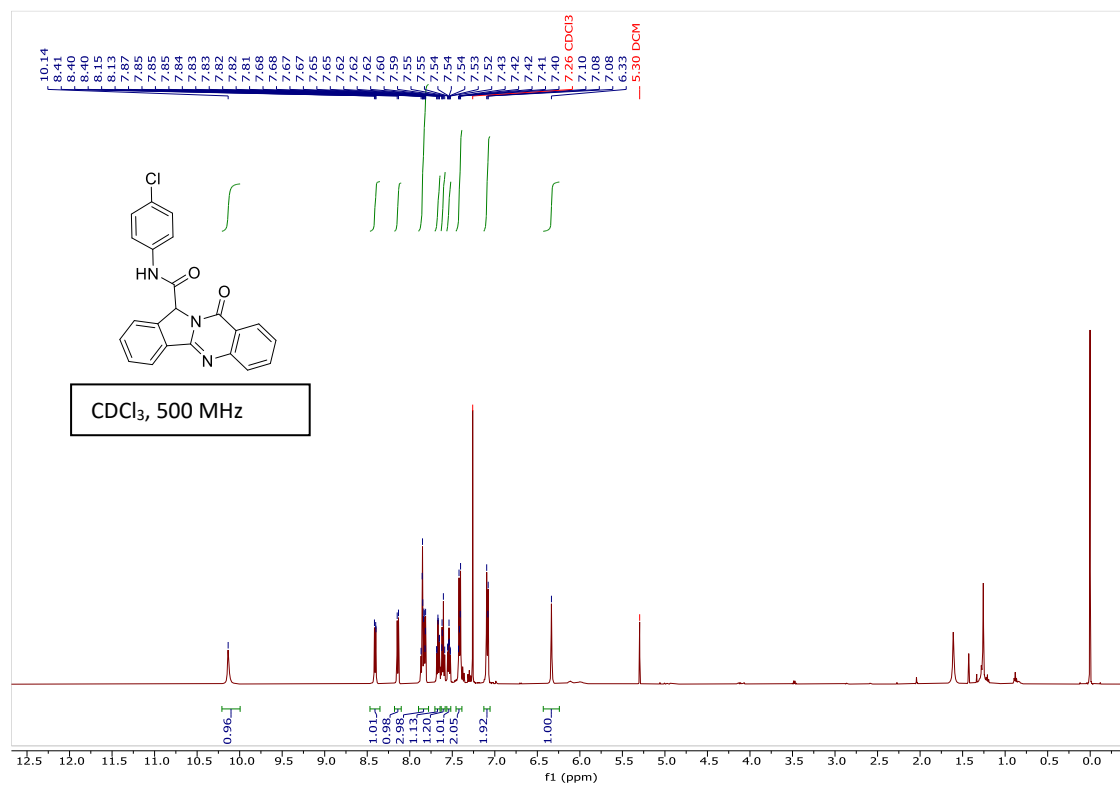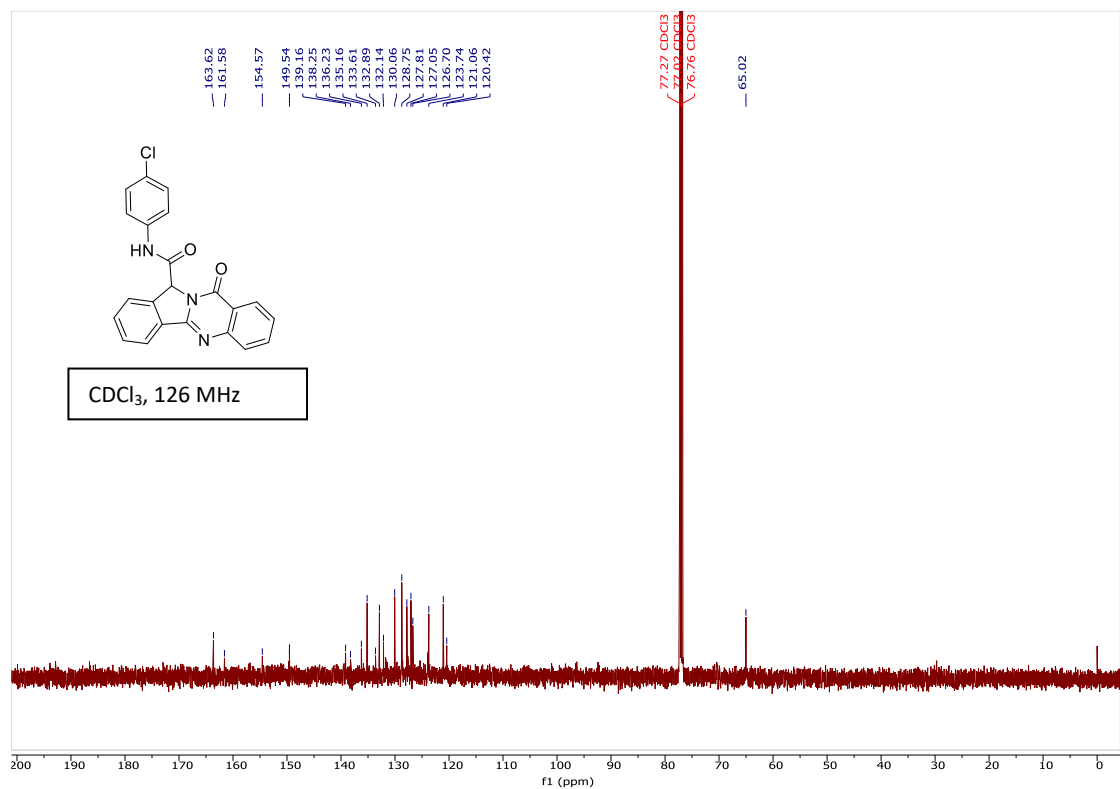

N-((3-methylthiophen-2-yl)methyl)-10-oxo-10,12-dihydroisindolo[1,2-b]quinazoline-12-carboxamide (**14b**)

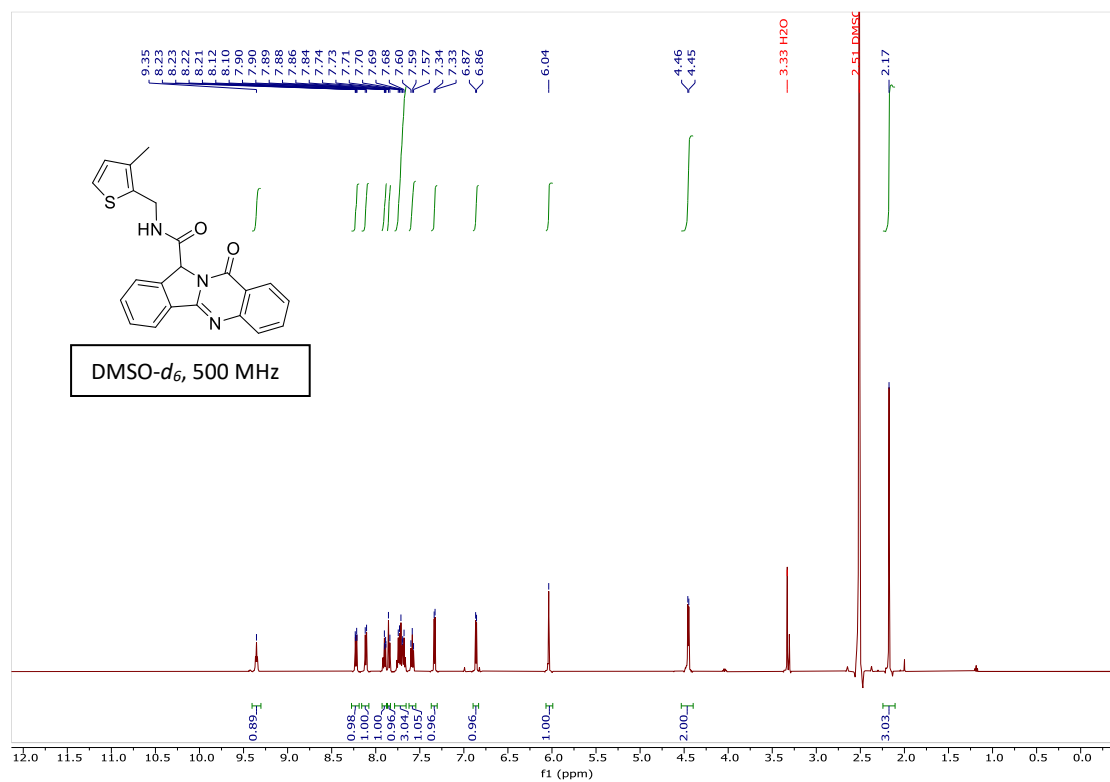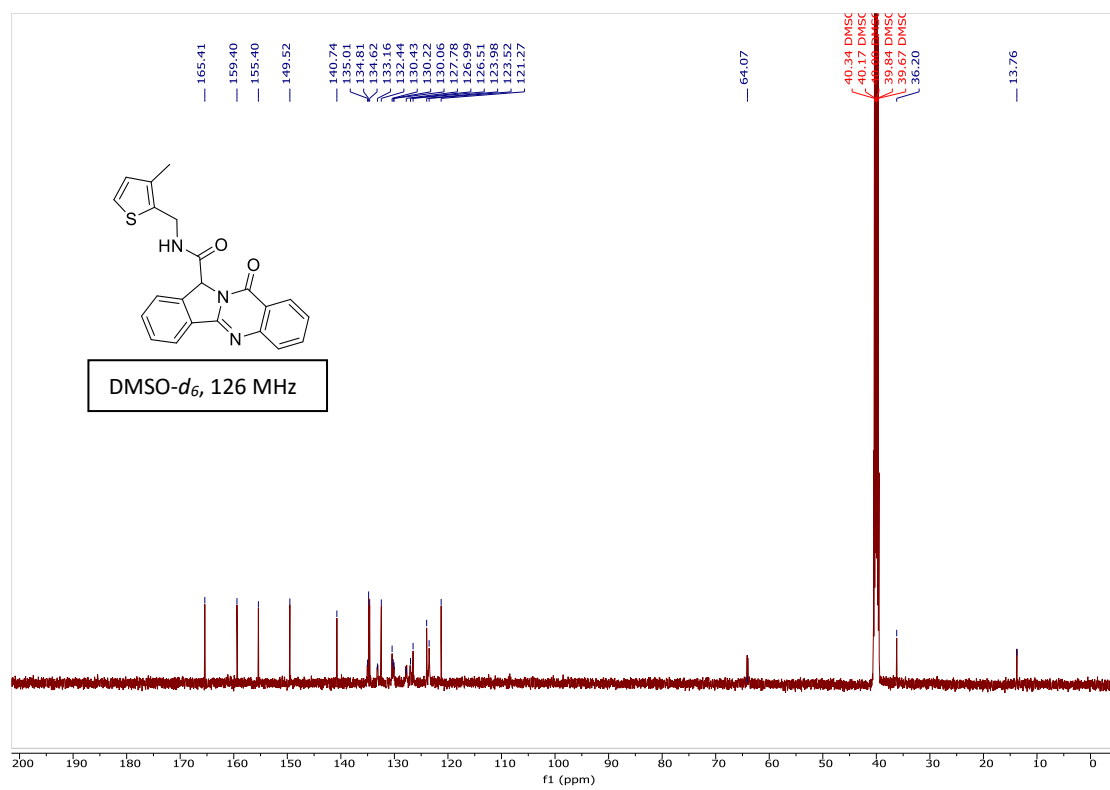

N-(2-methoxybenzyl)-10-oxo-10,12-dihydroisoindolo[1,2-b]quinazoline-12-carboxamide (**15b**)

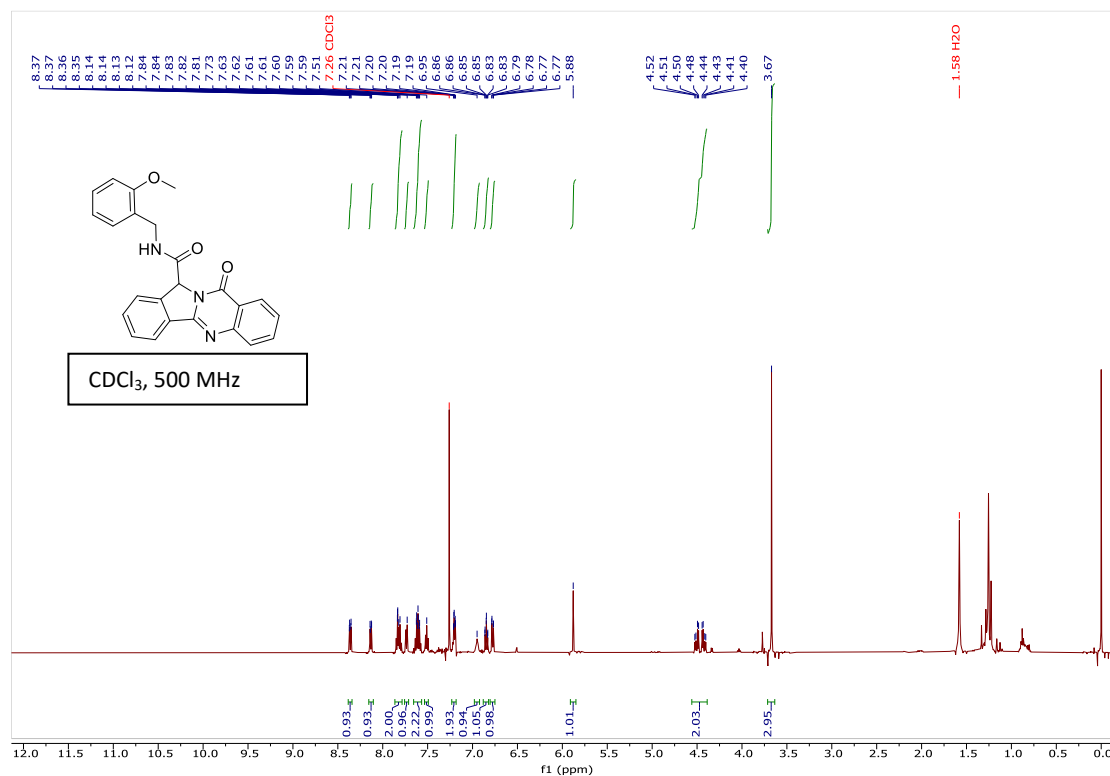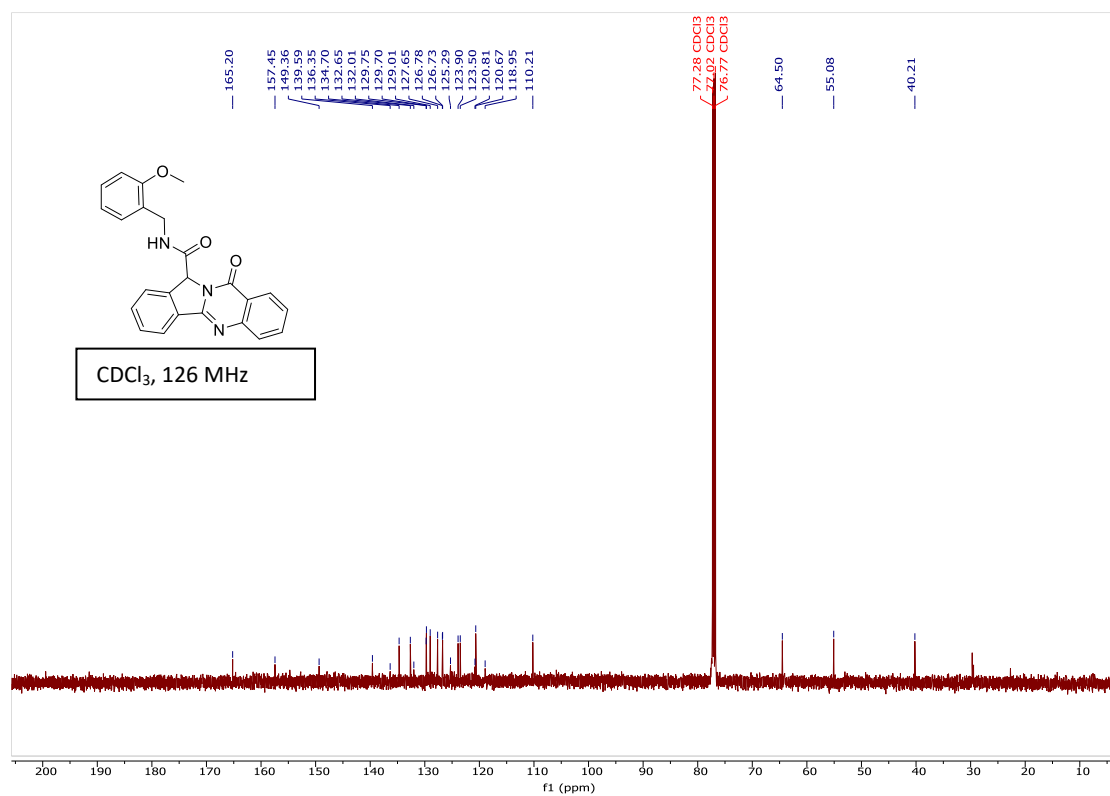

10-oxo-N-(pyridin-3-ylmethyl)-10,12-dihydroisoindolo[1,2-b]quinazoline-12-carboxamide (**16b**)

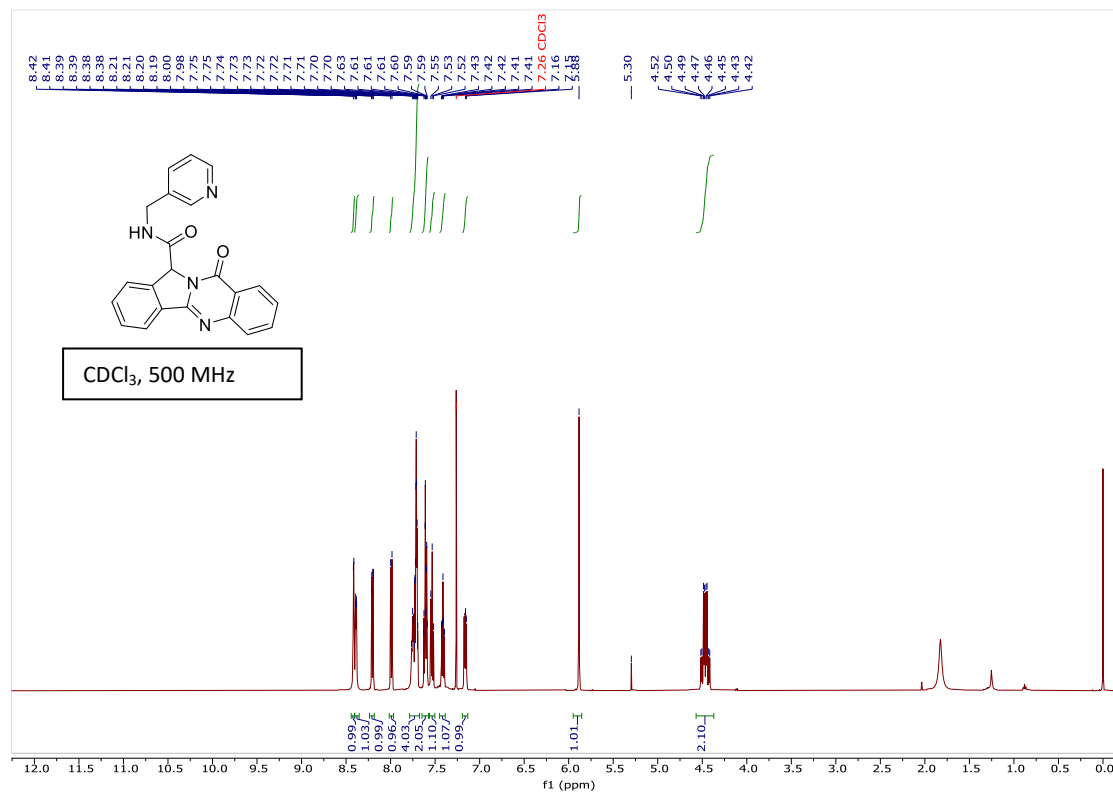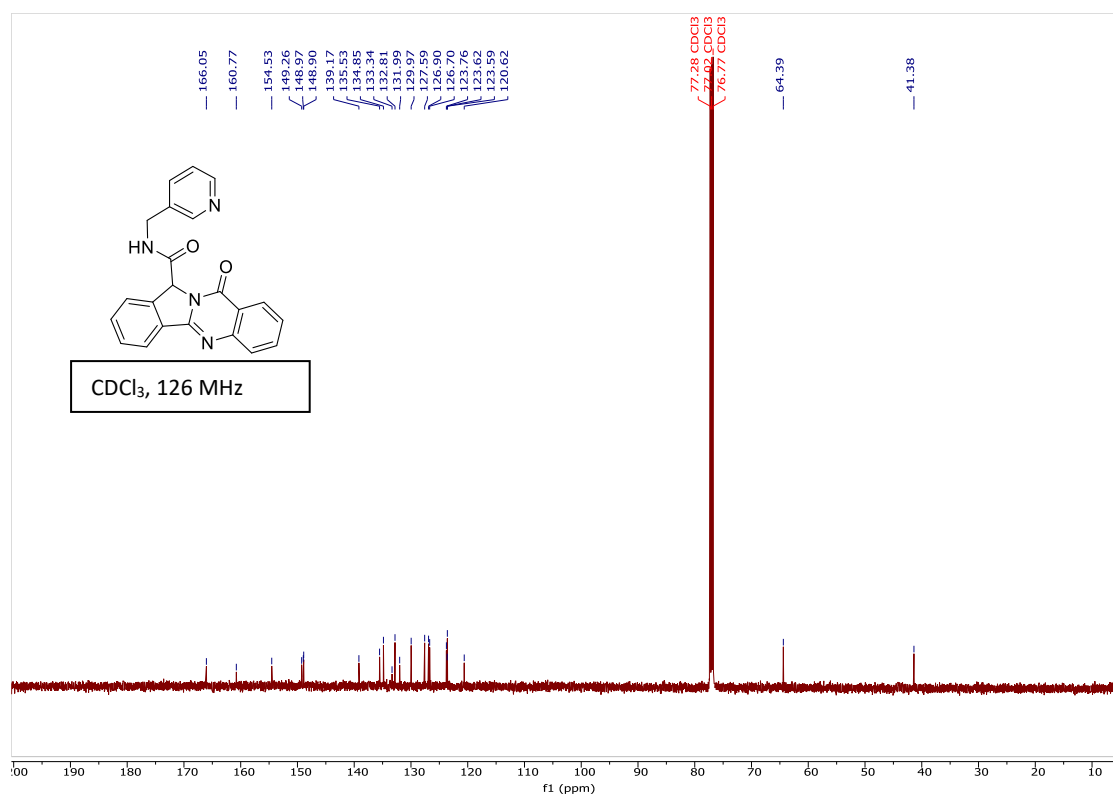

N-((3S,5S)-adamantan-1-yl)-10-oxo-10,12-dihydroisindolo[1,2-b]quinazoline-12-carboxamide (**17b**)

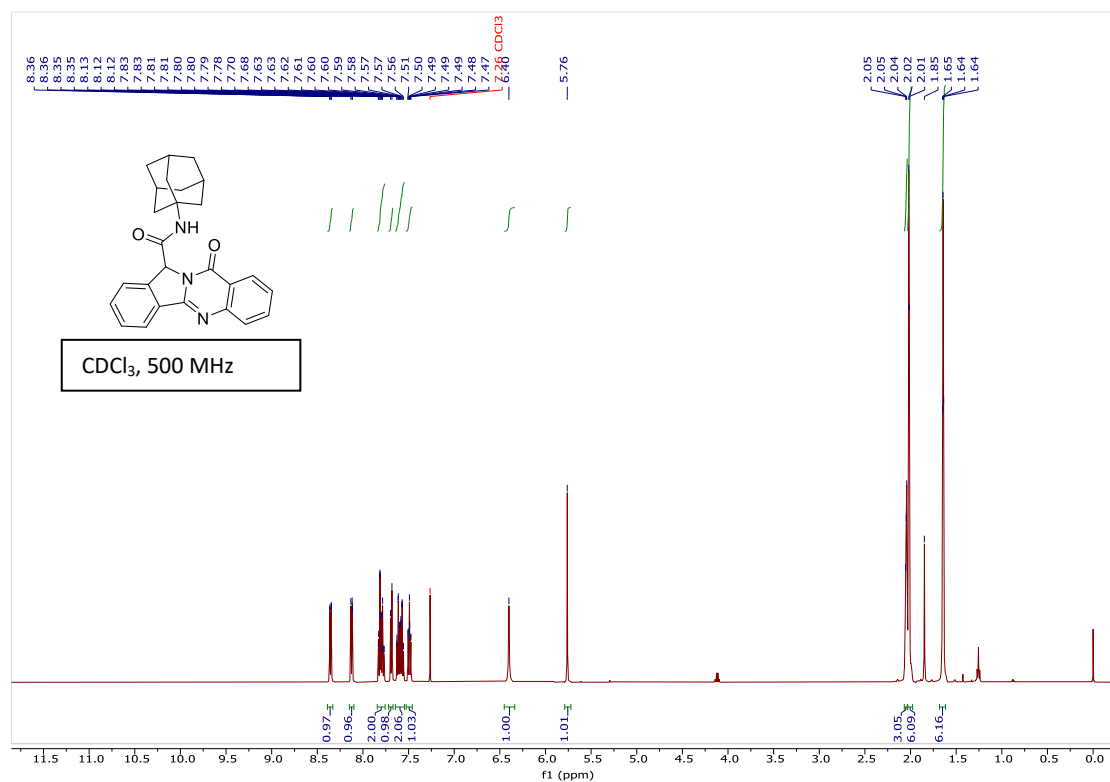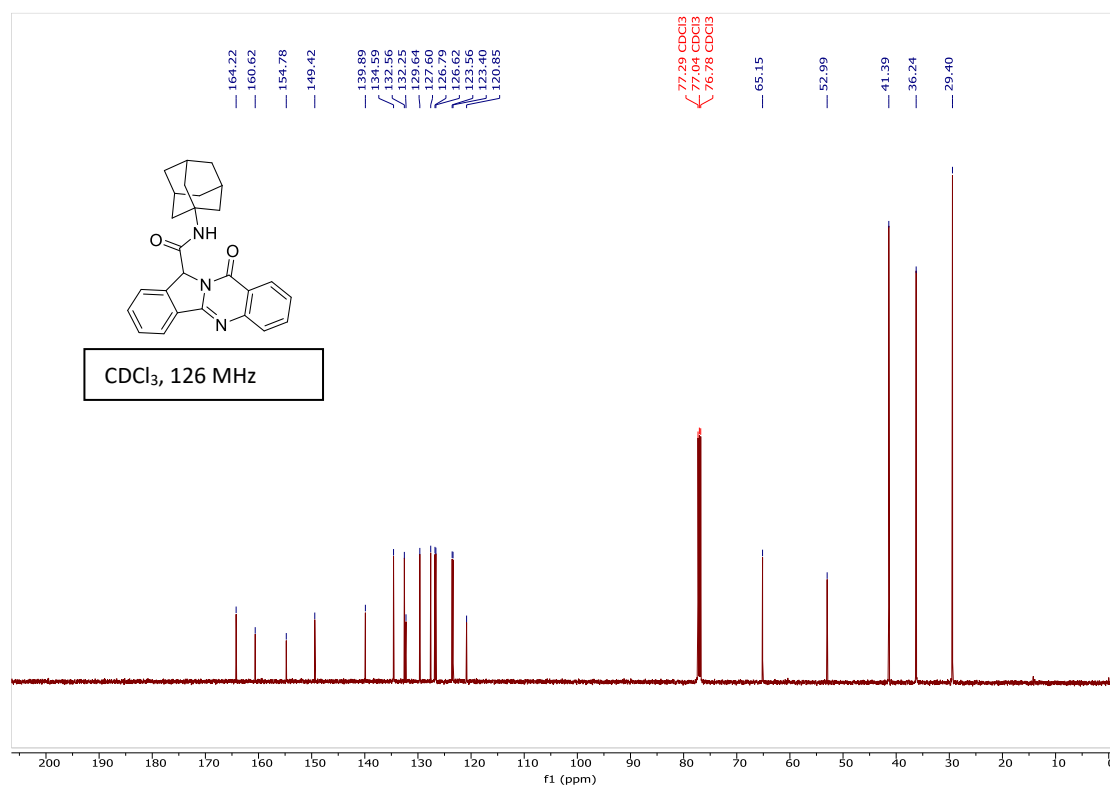

10-oxo-N-((tetrahydrofuran-2-yl)methyl)-10,12-dihydroisindolo[1,2-b]quinazoline-12-carboxamide (**18b**)

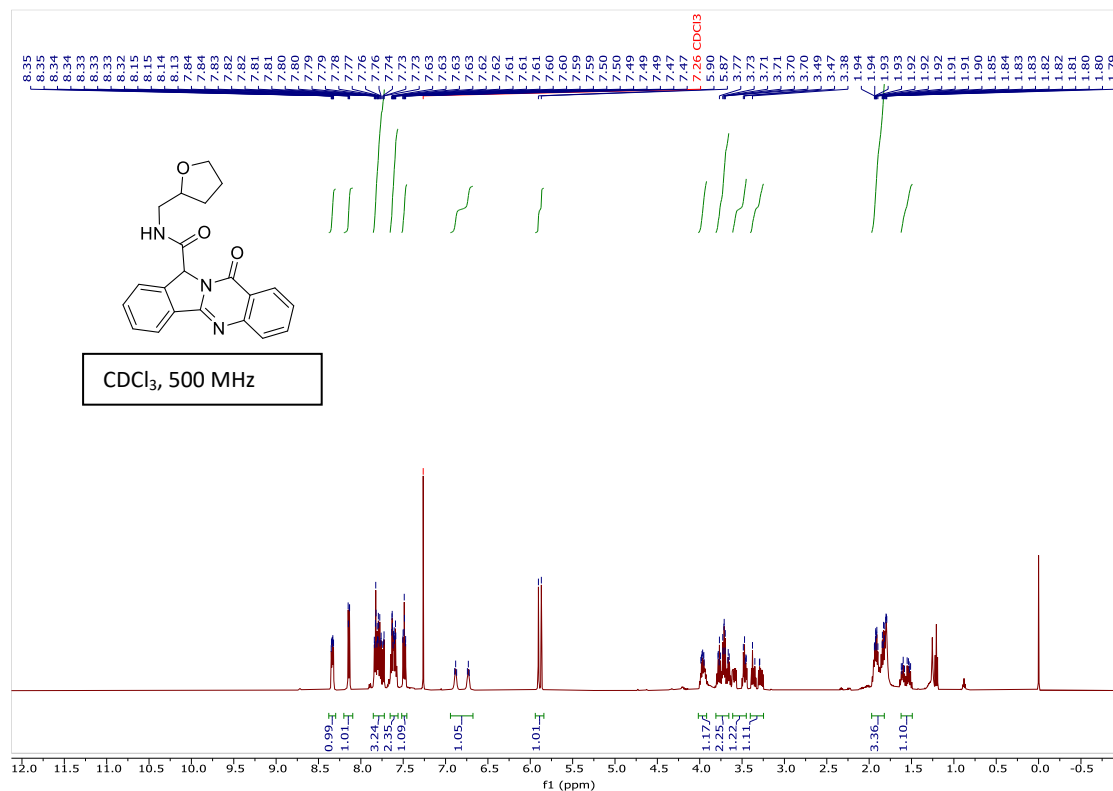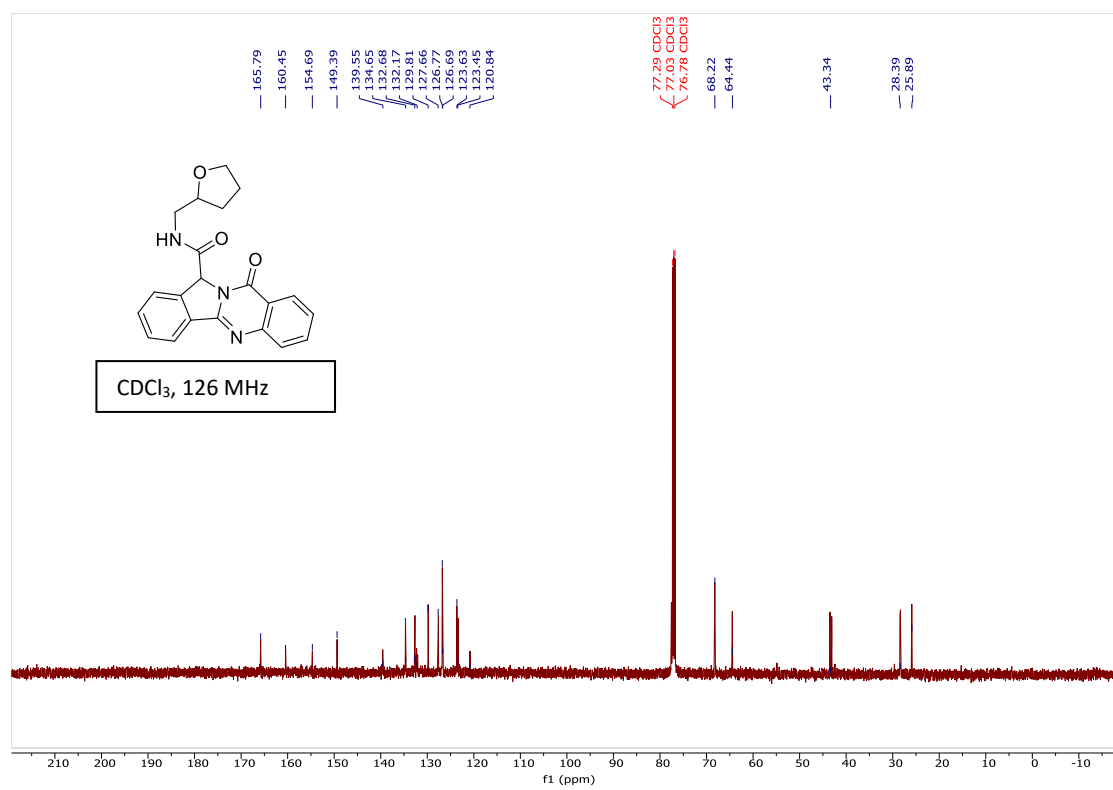

10-oxo-N-(2,4,4-trimethylpentan-2-yl)-10,12-dihydroisindolo[1,2-b]quinazoline-12-carboxamide (**19b**)

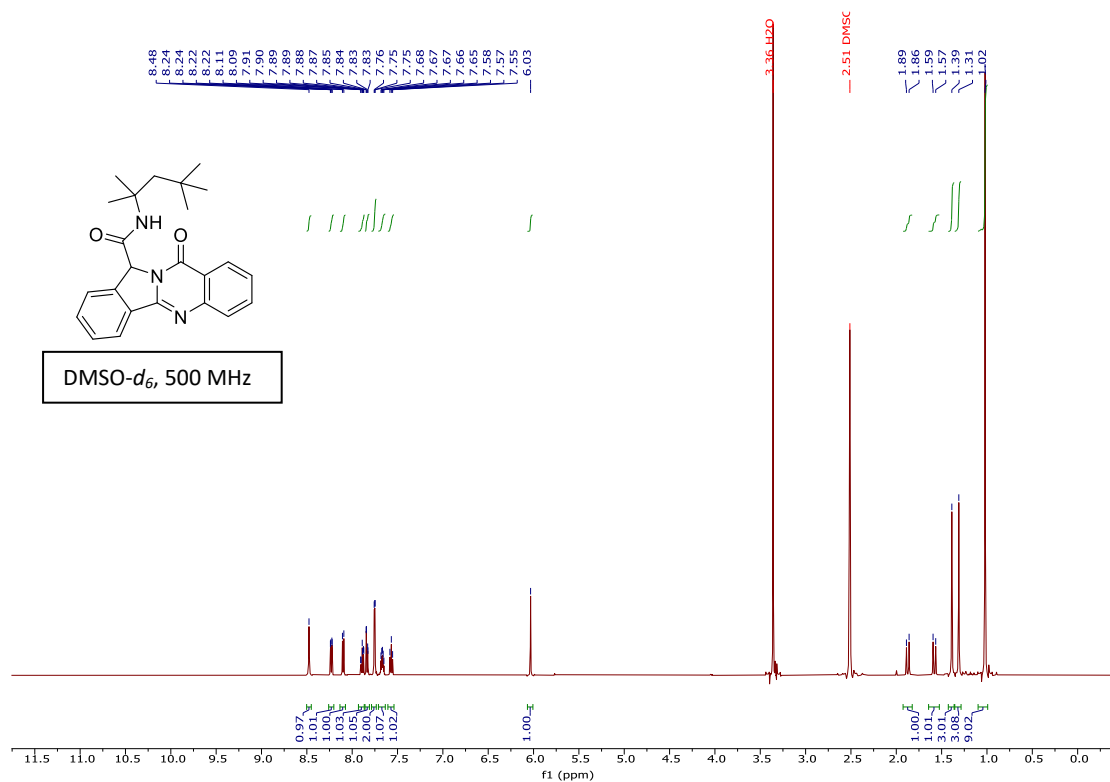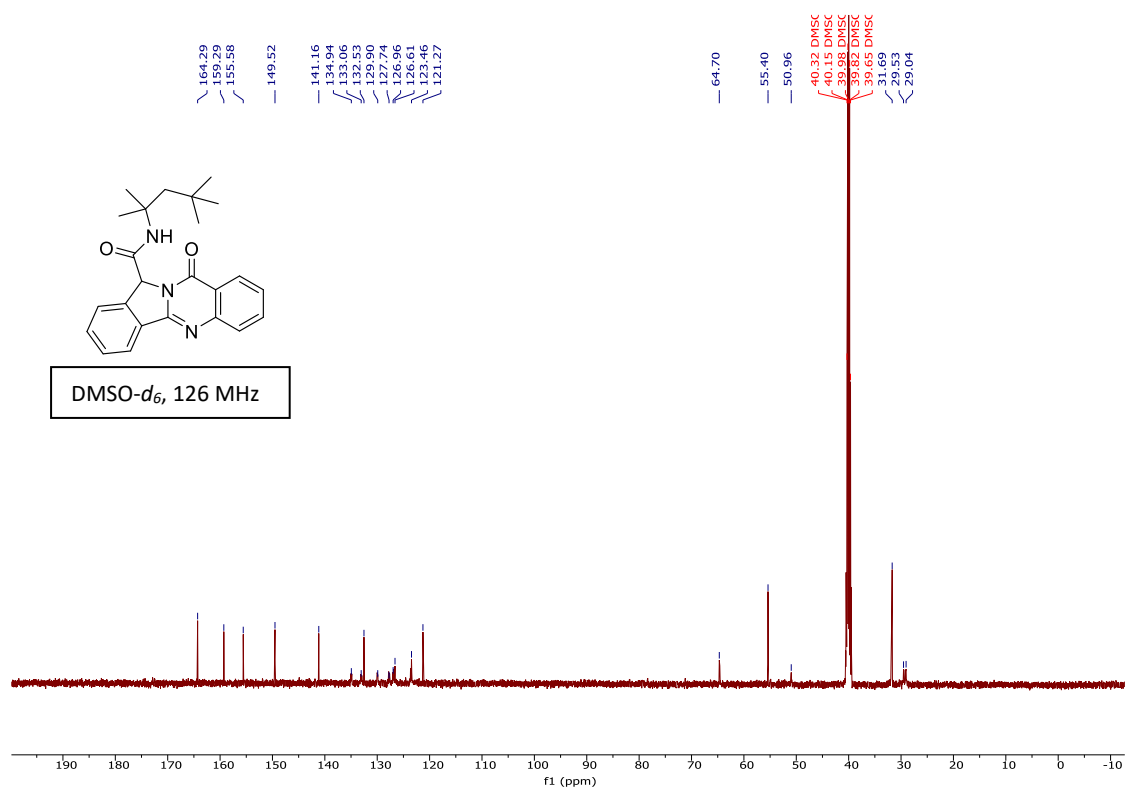



methyl (10-oxo-10,12-dihydroisindolo[1,2-b]quinazoline-12-carbonyl)glycinate (**20b**)

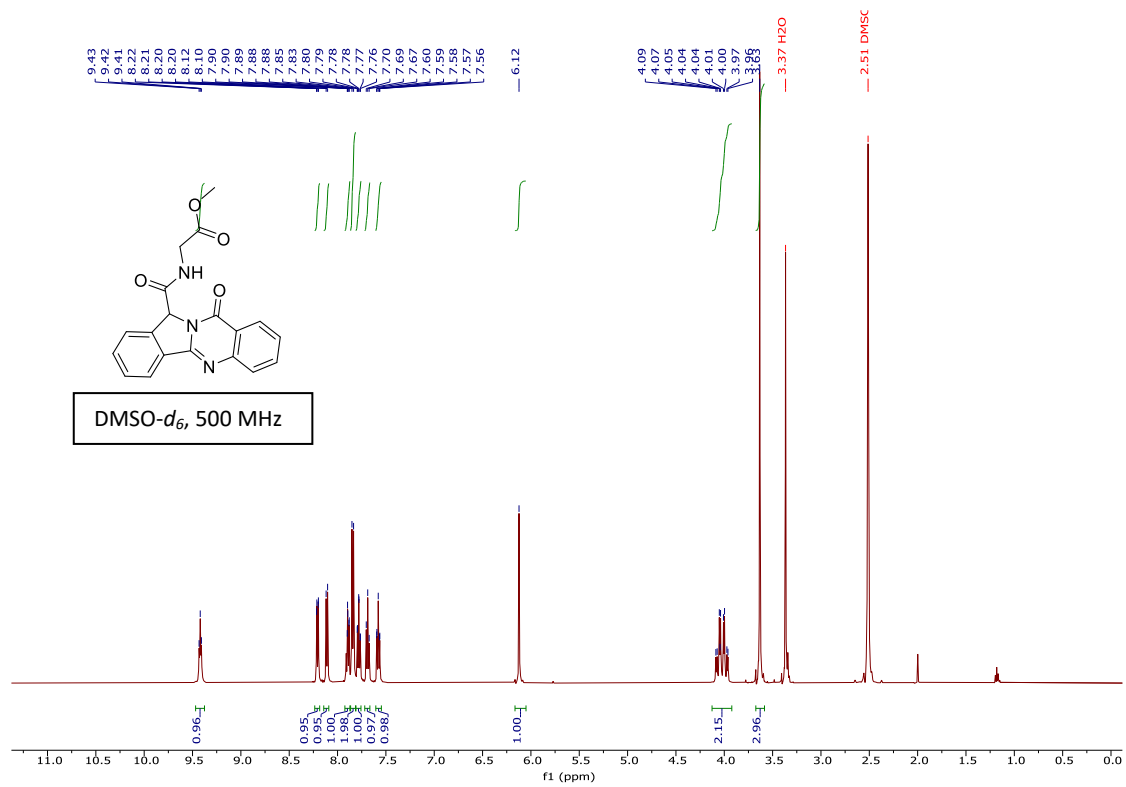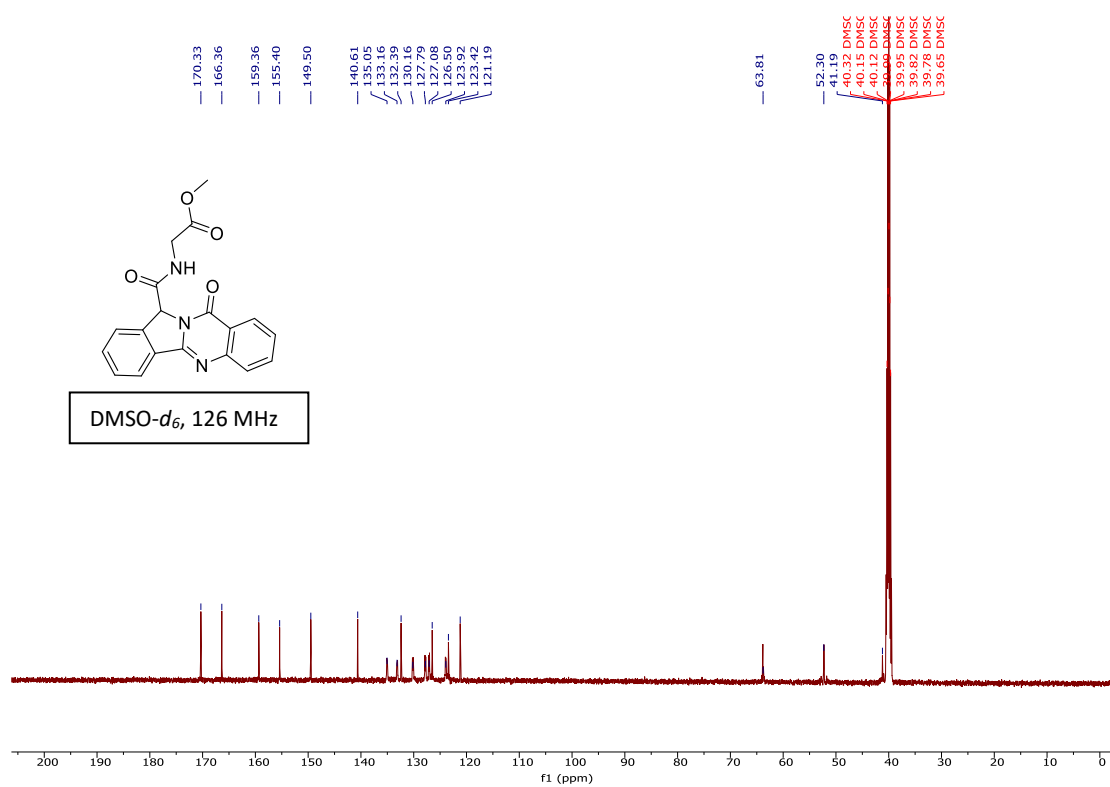

tert-butyl (2-(10-oxo-10,12-dihydroisoindolo[1,2-b]quinazoline-12-carboxamido)ethyl)-carbamate (**21b**)

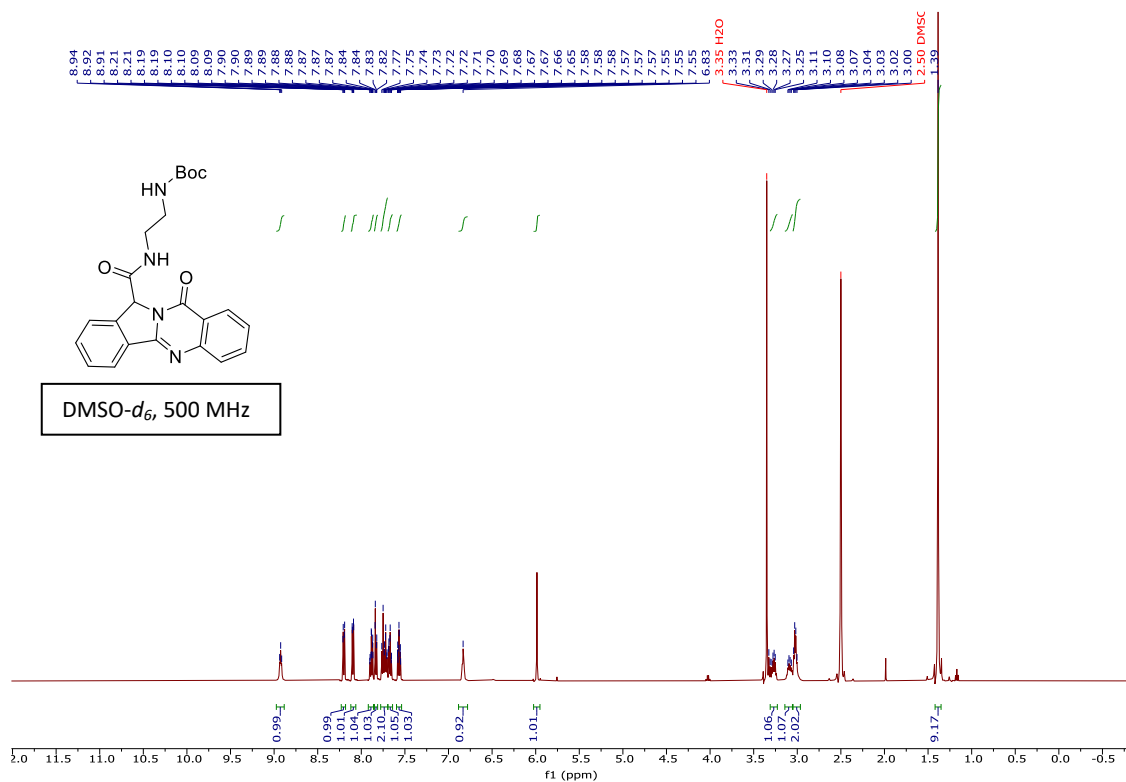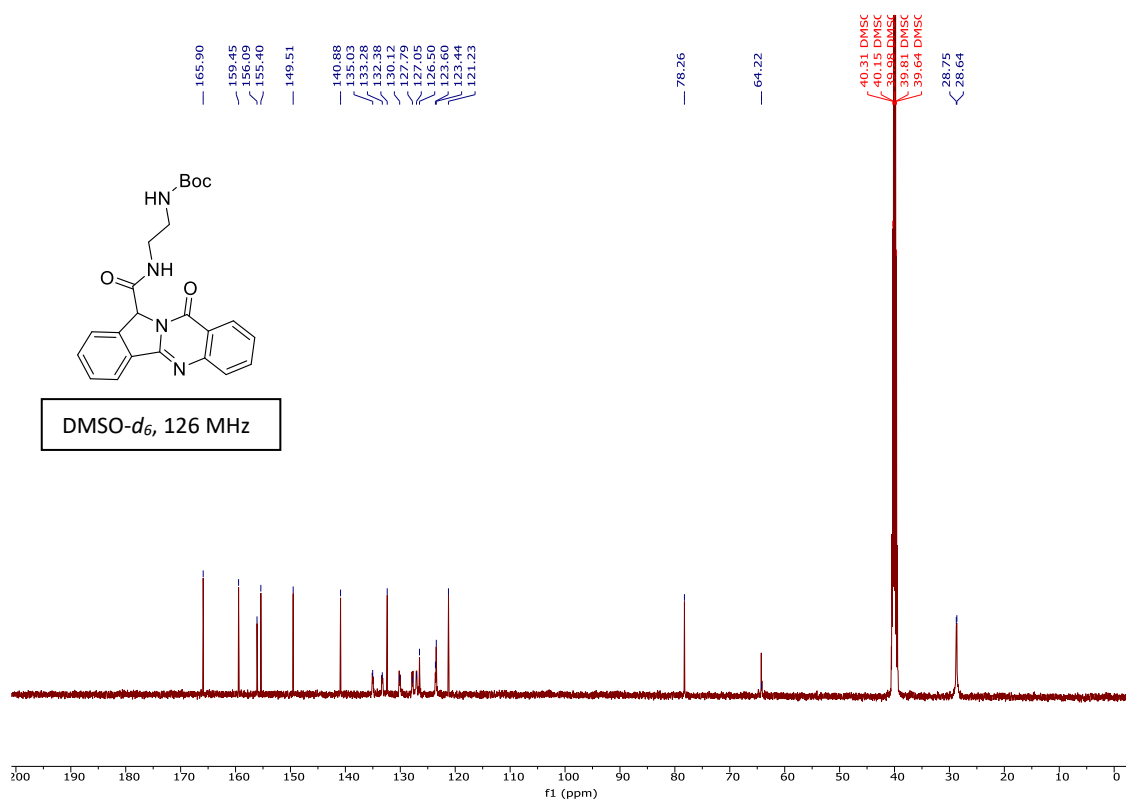

N-(3-cyanobenzyl)-10-oxo-10,12-dihydroisindolo[1,2-b]quinazoline-12-carboxamide  
(22b)

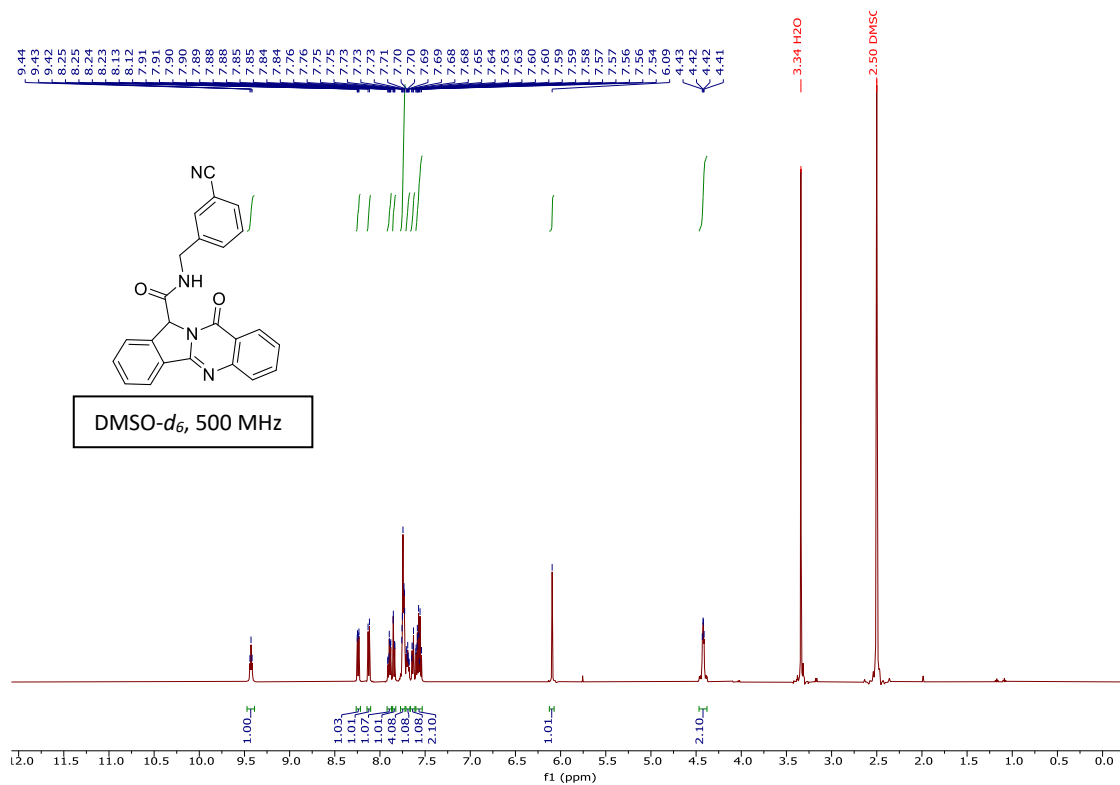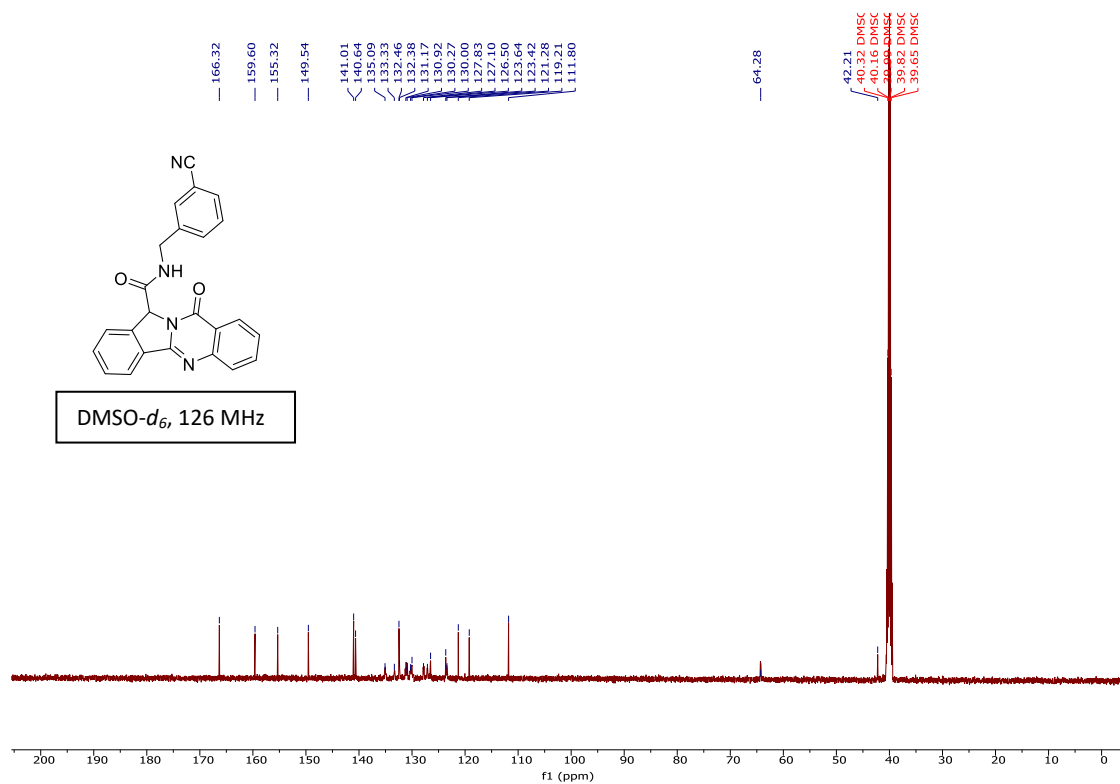

N-(2-chloro-3,6-difluorobenzyl)-10-oxo-10,12-dihydroisoindolo[1,2-b]quinazoline-12-carboxamide (**23b**)

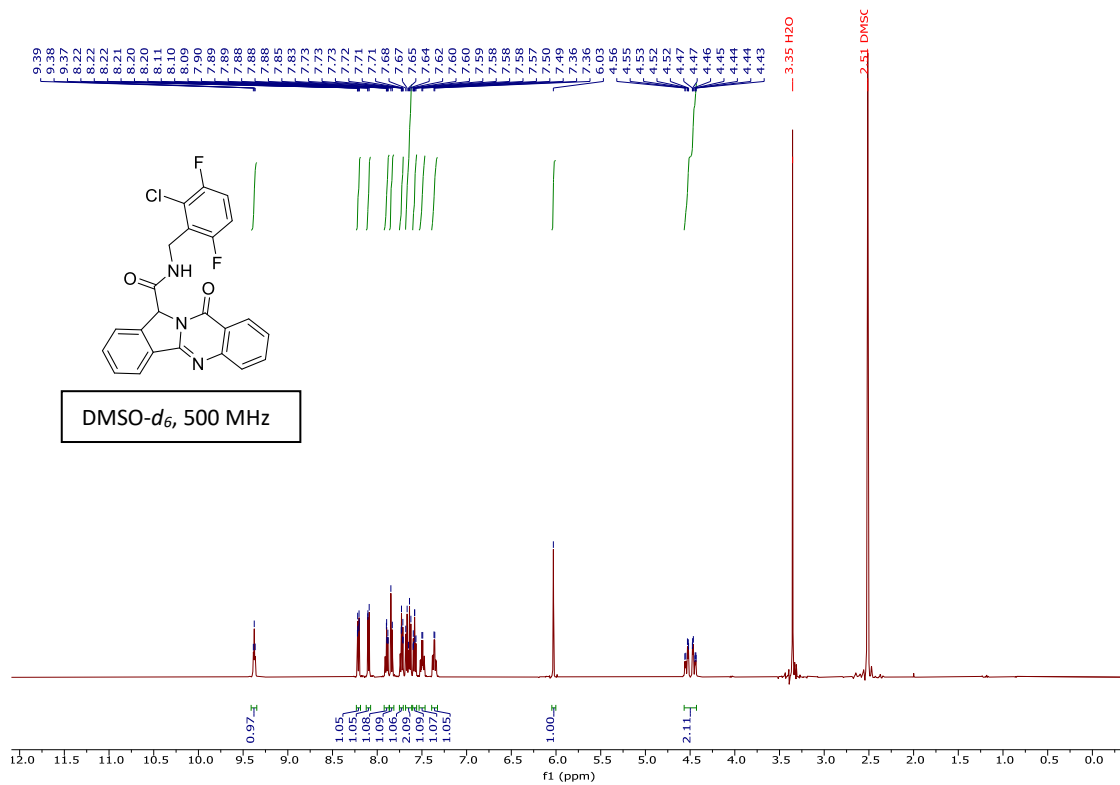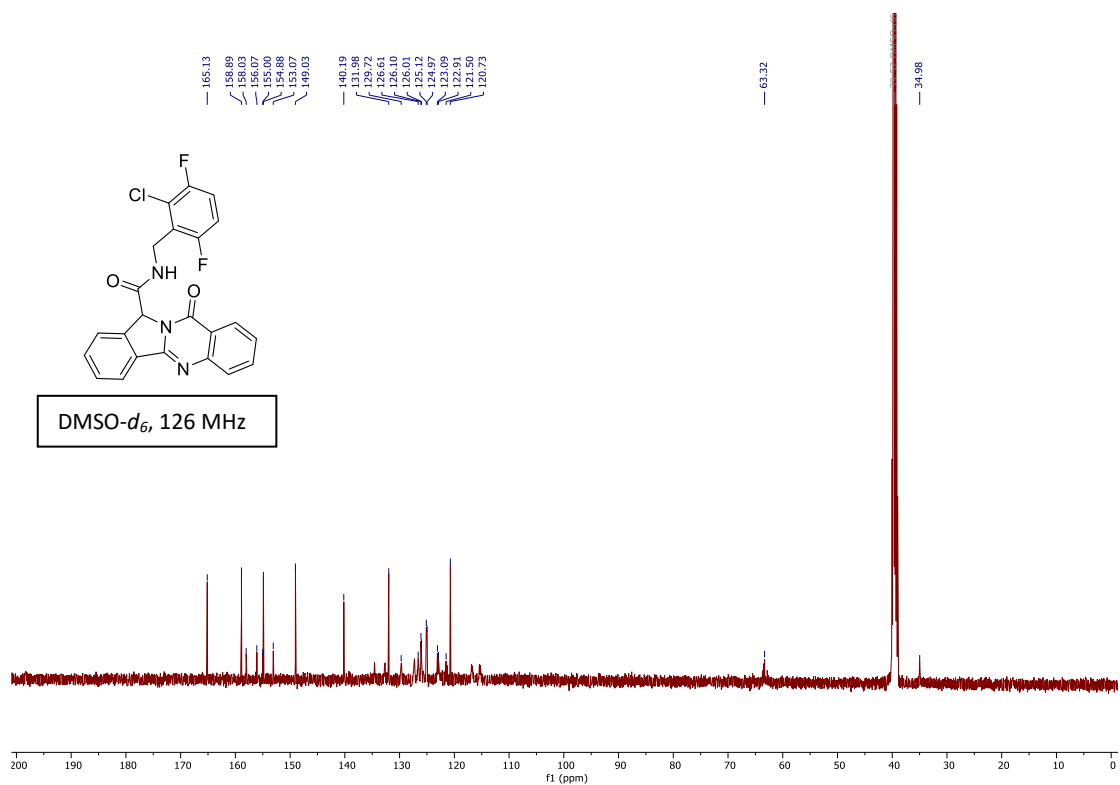

10-oxo-N-(2-(trifluoromethoxy)benzyl)-10,12-dihydroisindolo[1,2-b]quinazoline-12-carboxamide (**24b**)

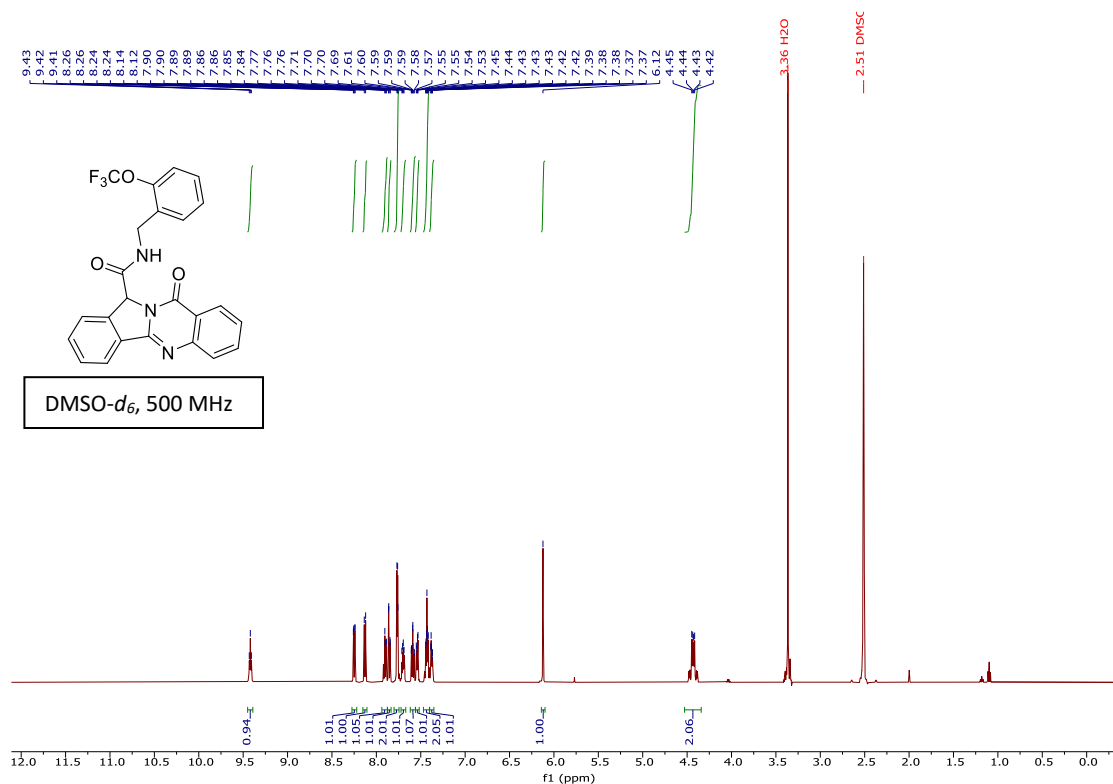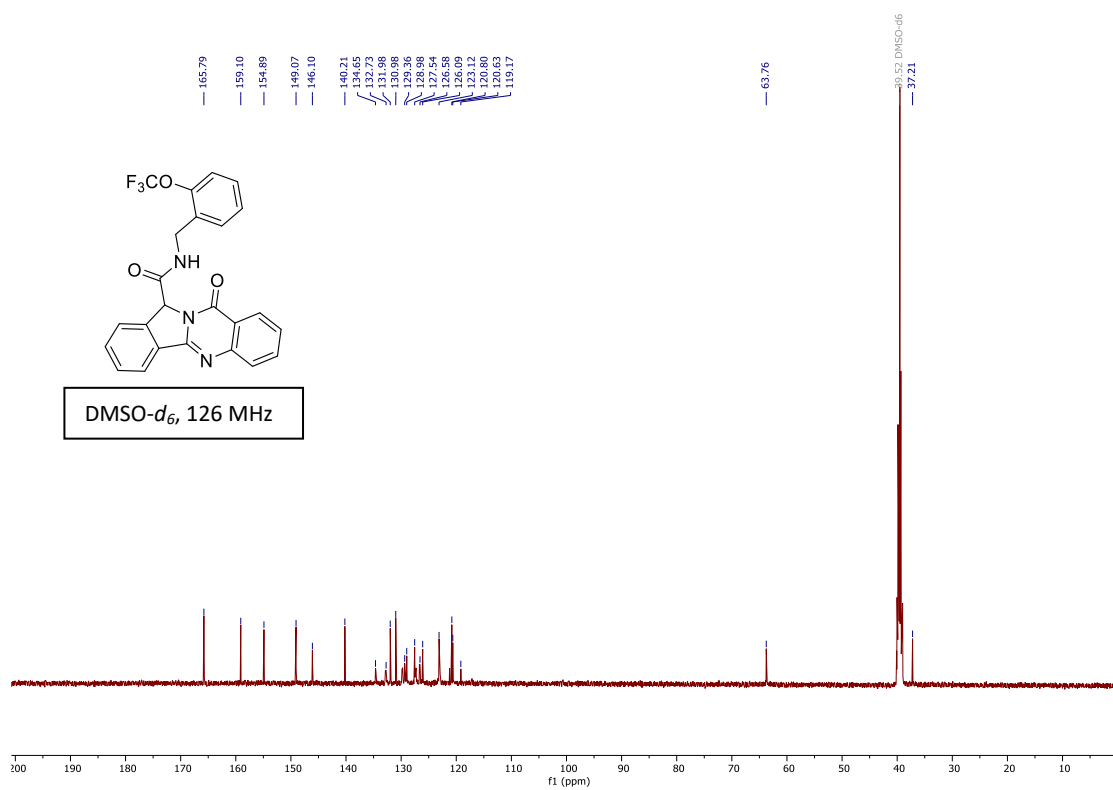

N-benzyl-7-methyl-10-oxo-10,12-dihydroisoindolo[1,2-b]quinazoline-12-carboxamide (**25b**)

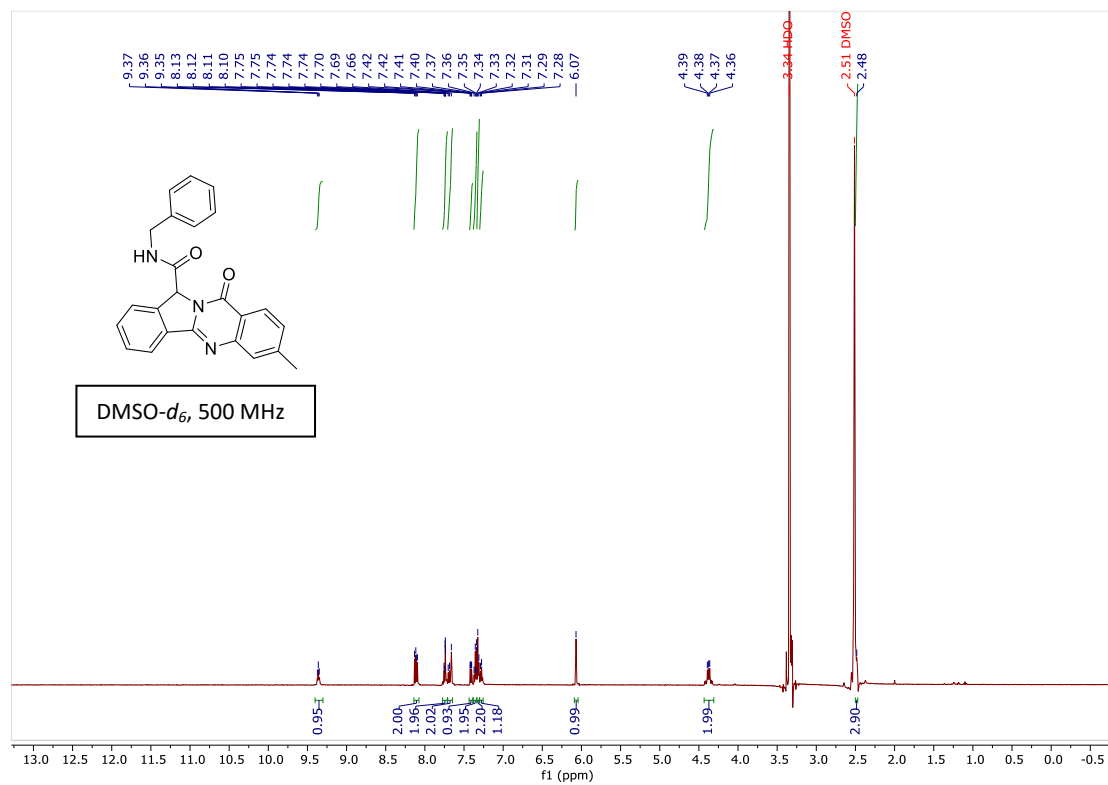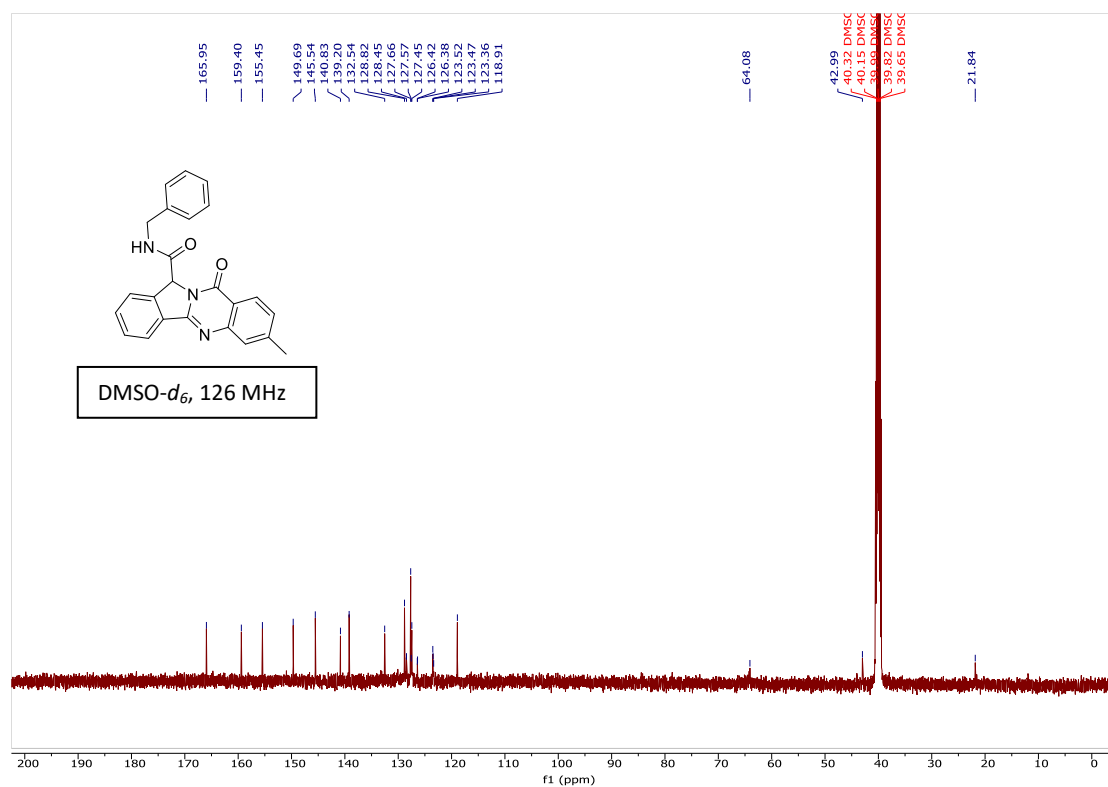

N-benzyl-4-oxo-4,6-dihydrothieno[2',3':4,5]pyrimido[2,1-a]isoindole-6-carboxamide  
(26b)

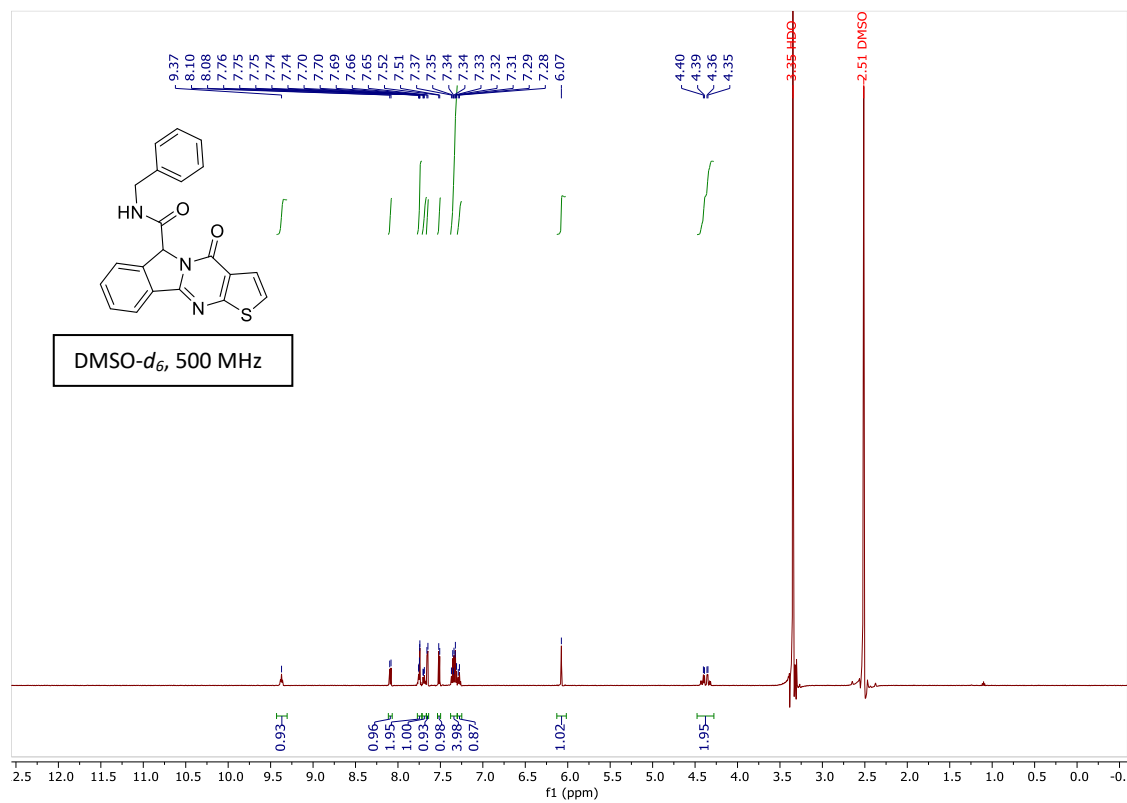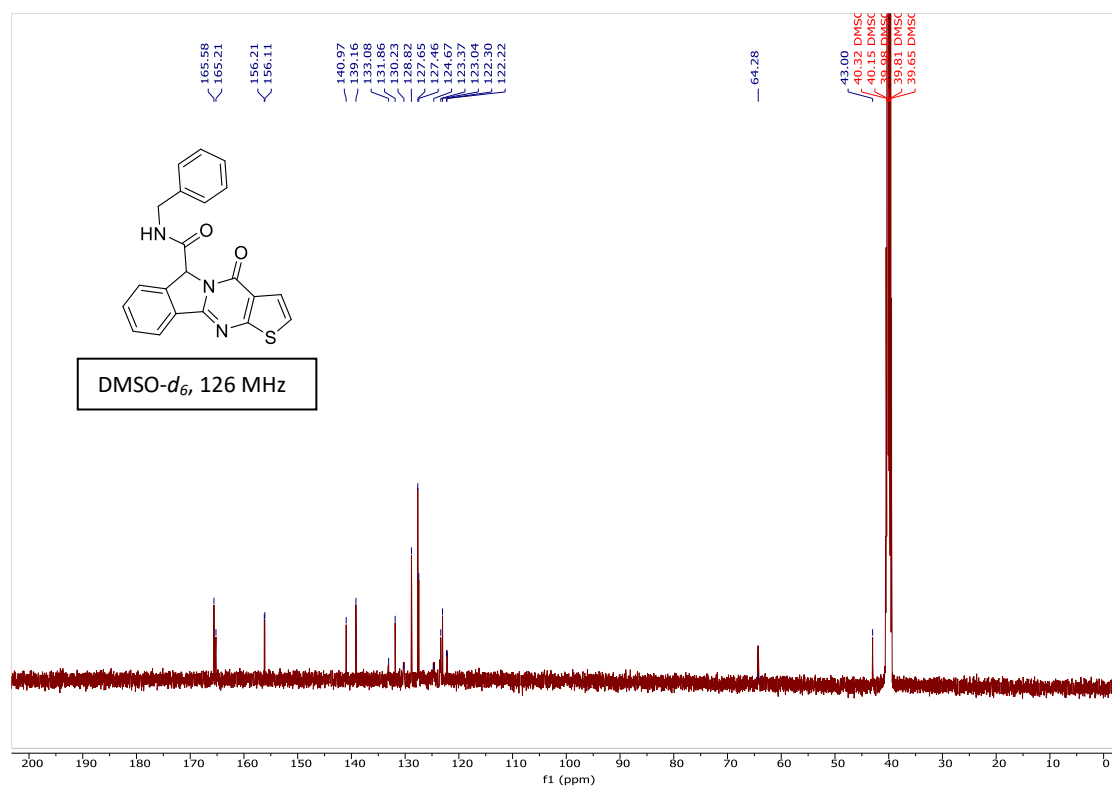

N-benzyl-7-bromo-10-oxo-10,12-dihydroisindolo[1,2-b]quinazoline-12-carboxamide  
(27b)

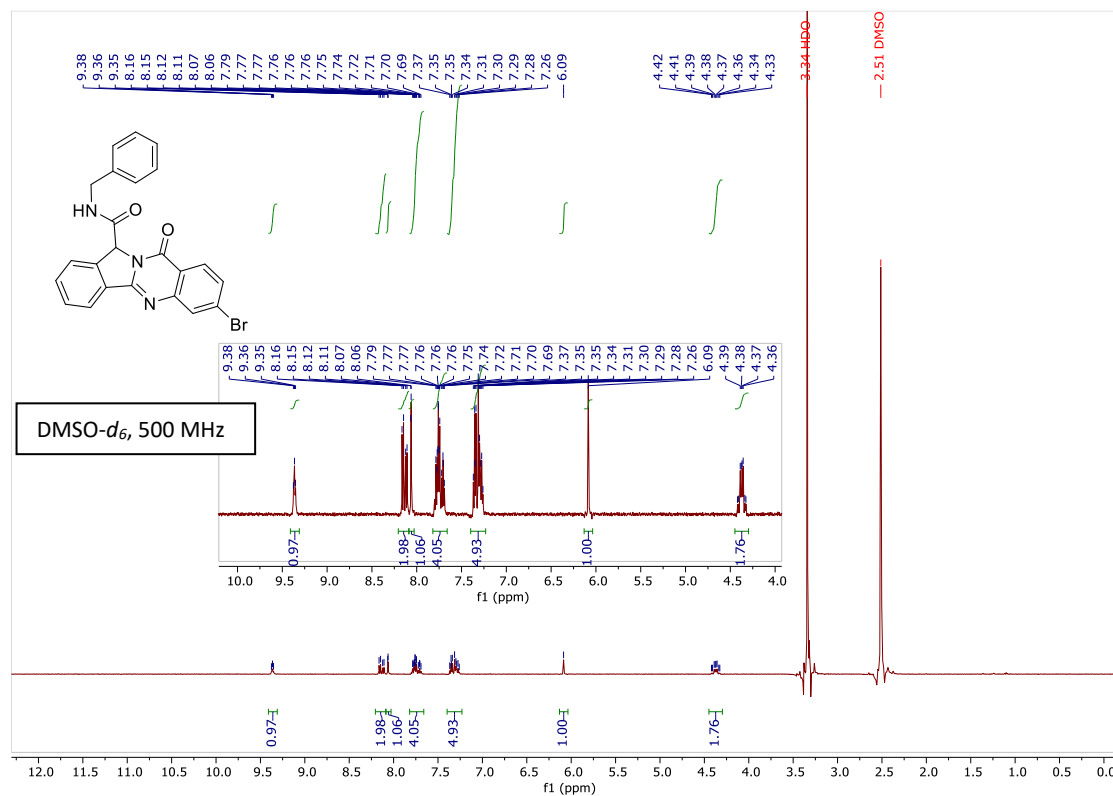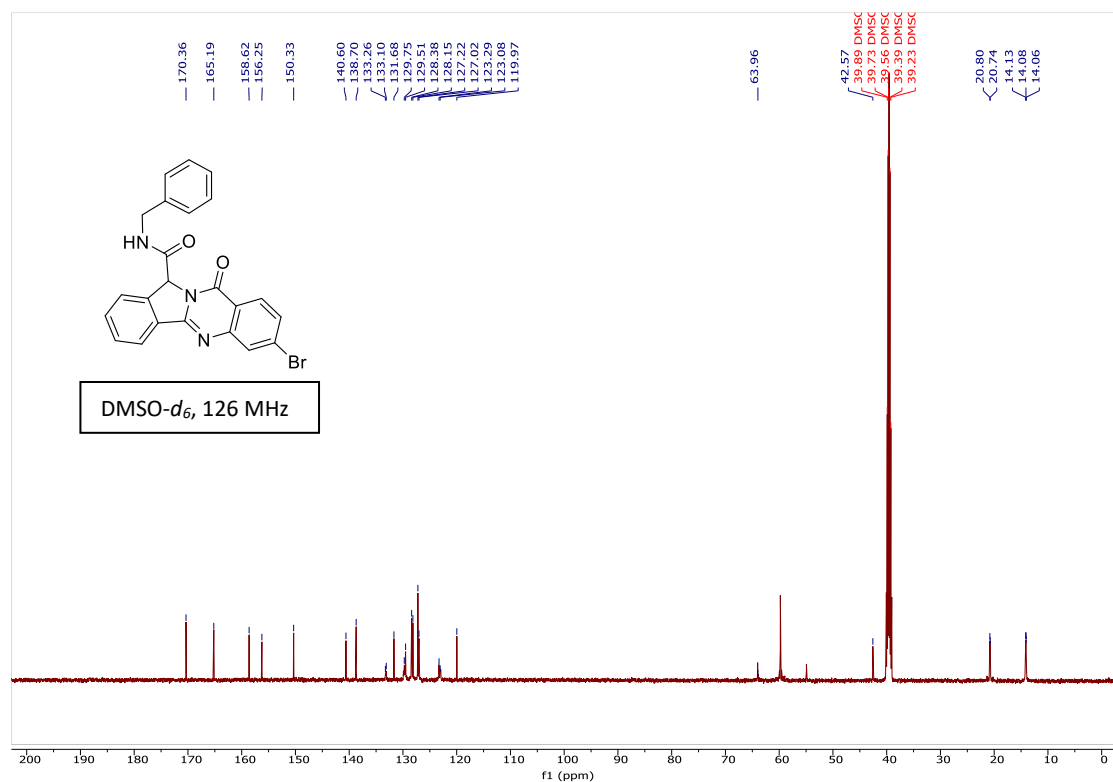



N-benzyl-8-methyl-10-oxo-10,12-dihydroisindolo[1,2-b]quinazoline-12-carboxamide (**28b**)

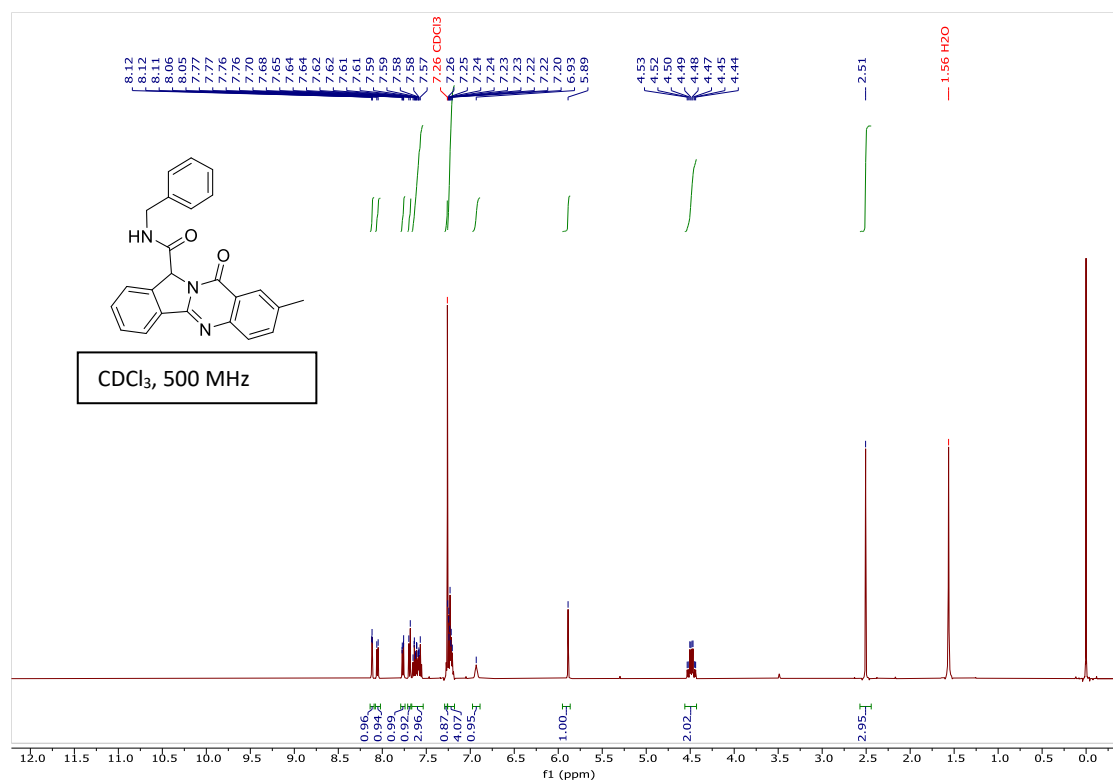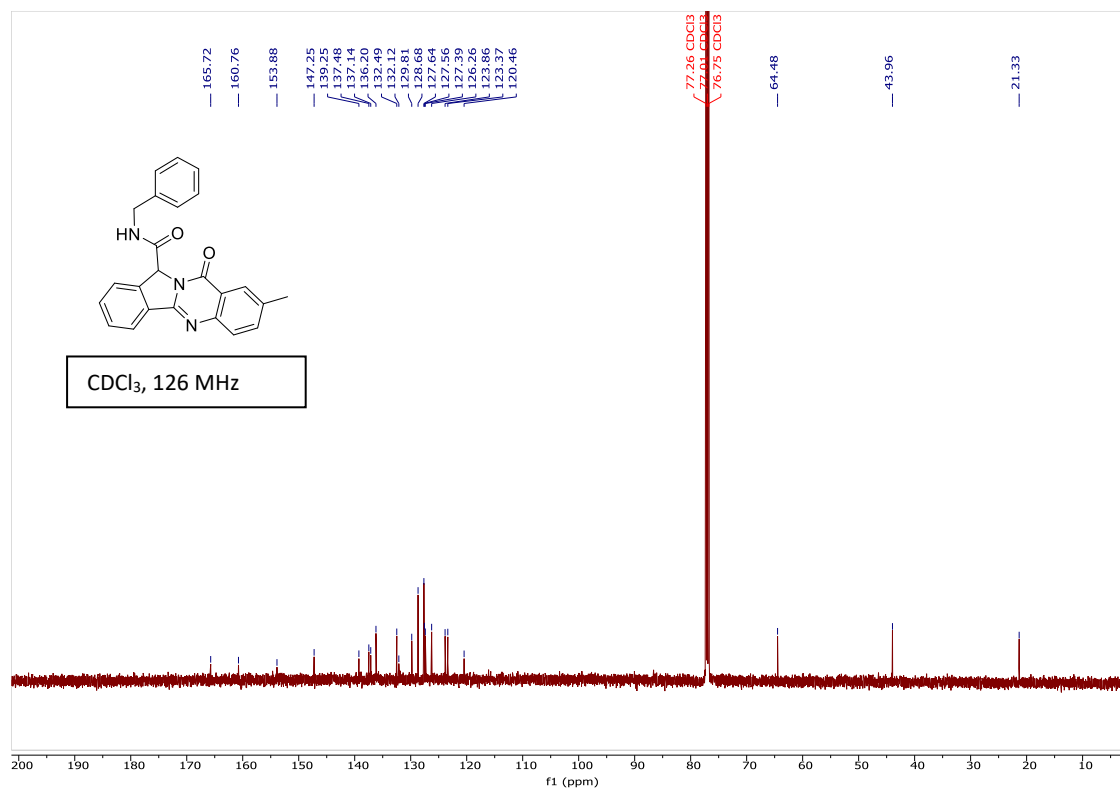

N-benzyl-12-oxo-10,12-dihydropyrido[4',3':4,5]pyrimido[2,1-a]isoindole-10-carboxamide (**29b**)

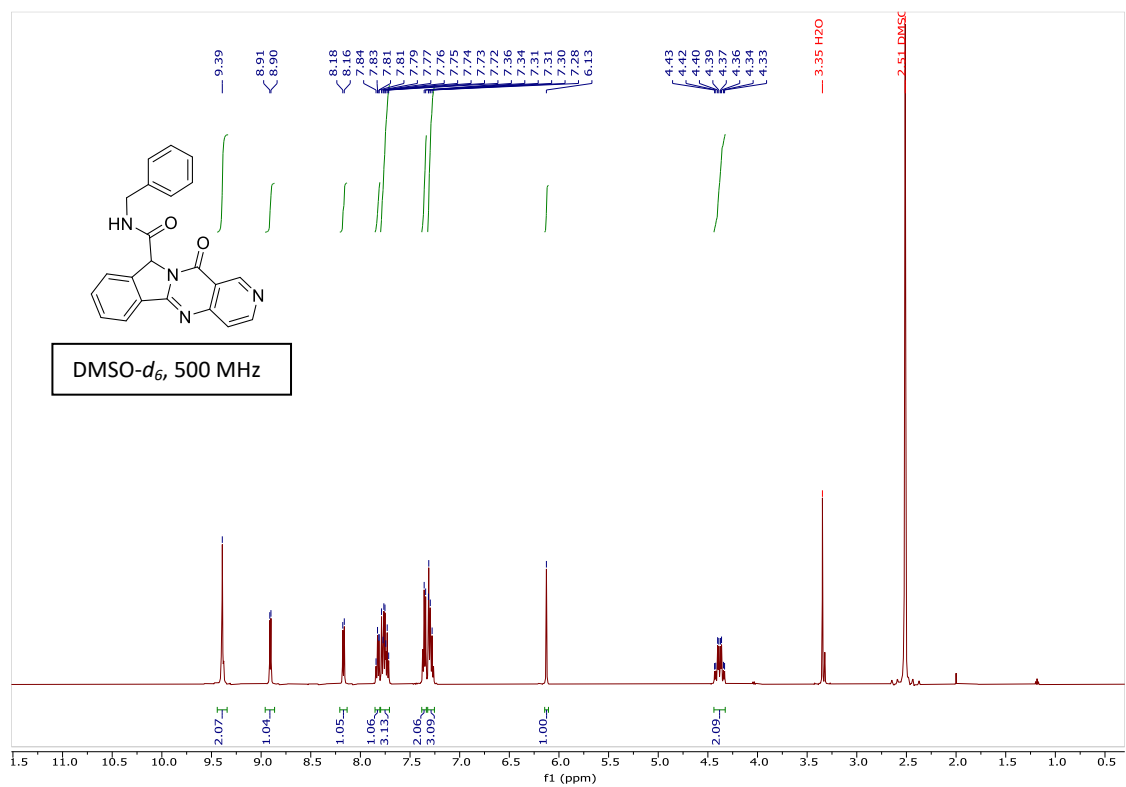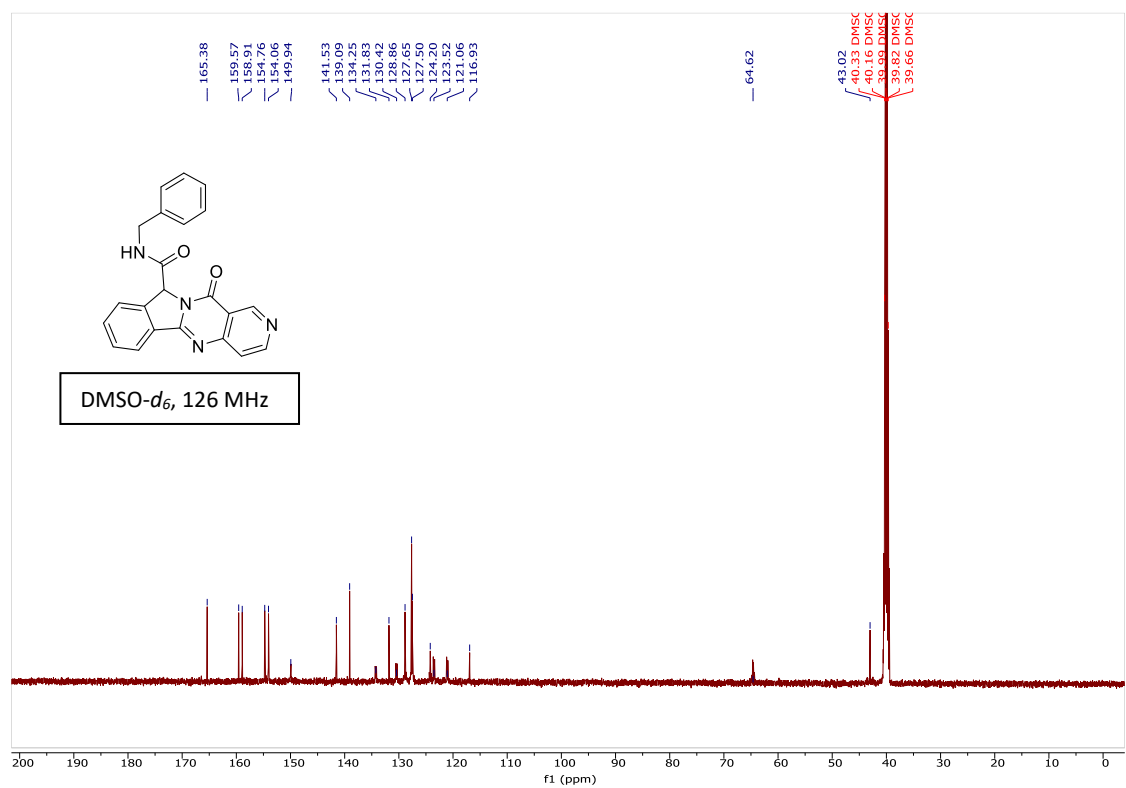

N-benzyl-7-oxo-7,9-dihydrobenzo[h]isoindolo[1,2-b]quinazoline-9-carboxamide (**30b**)

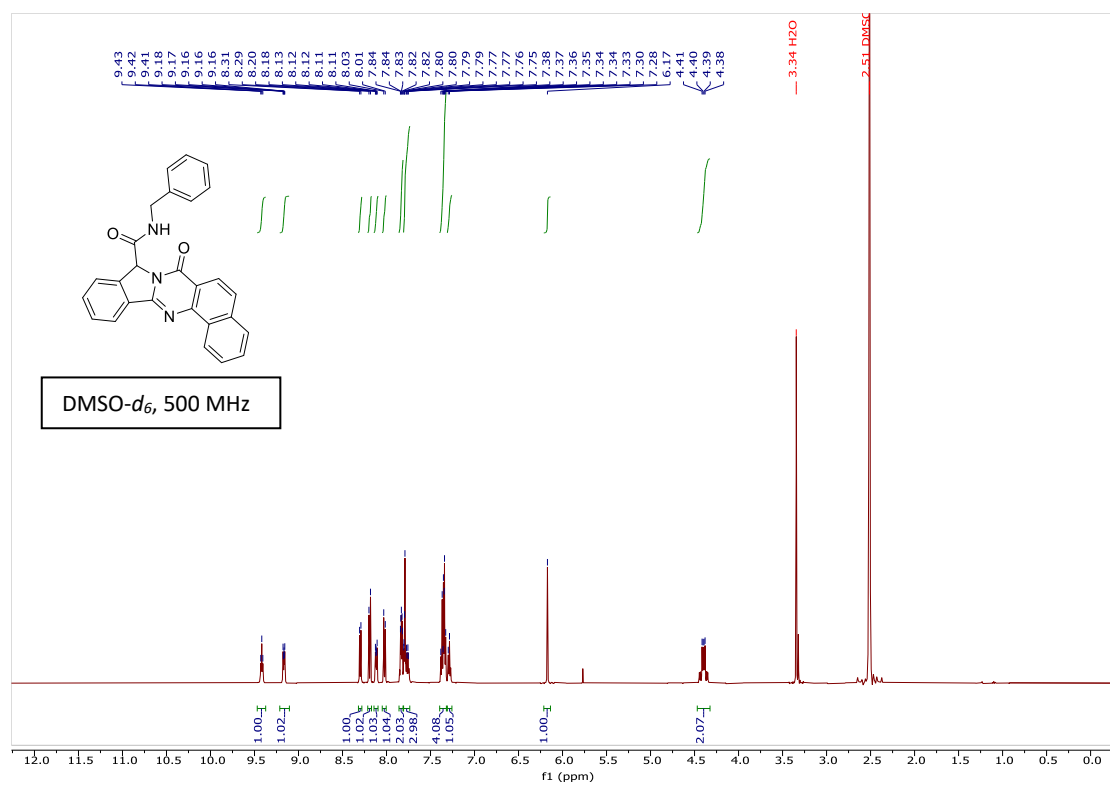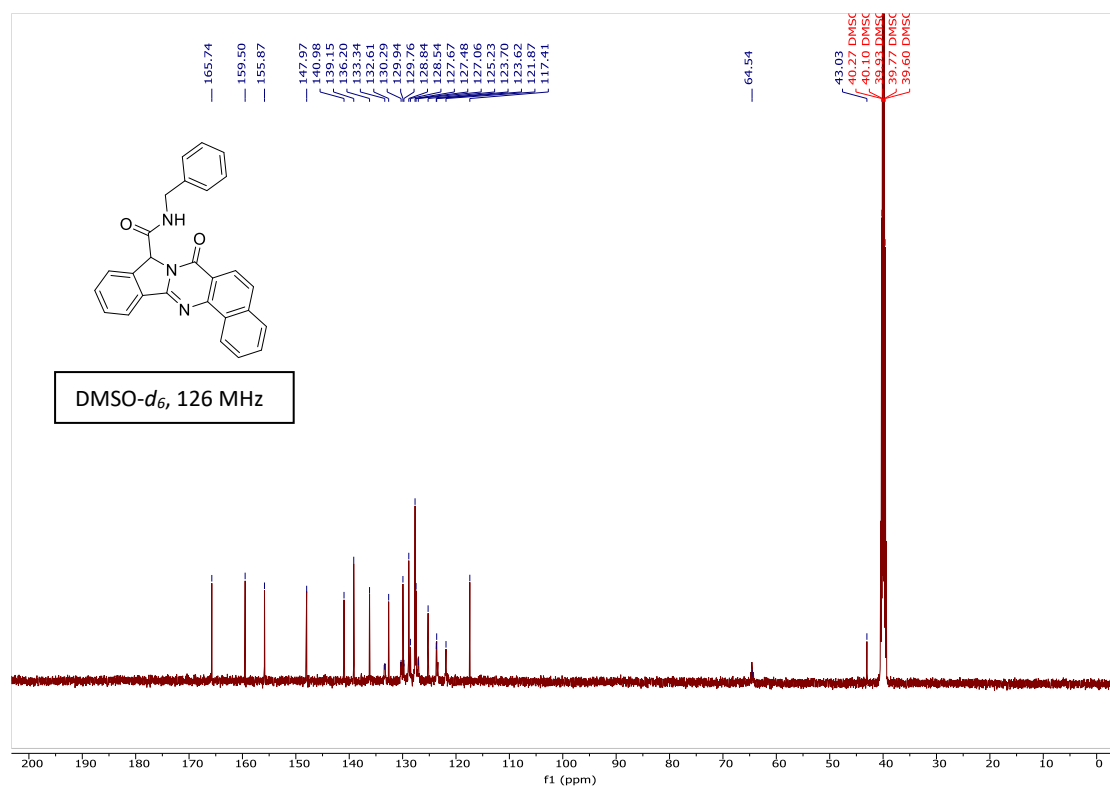

N-benzyl-5-oxo-5,7-dihydropyrido[3',4':4,5]pyrimido[2,1-a]isoindole-7-carboxamide  
**(31b)**

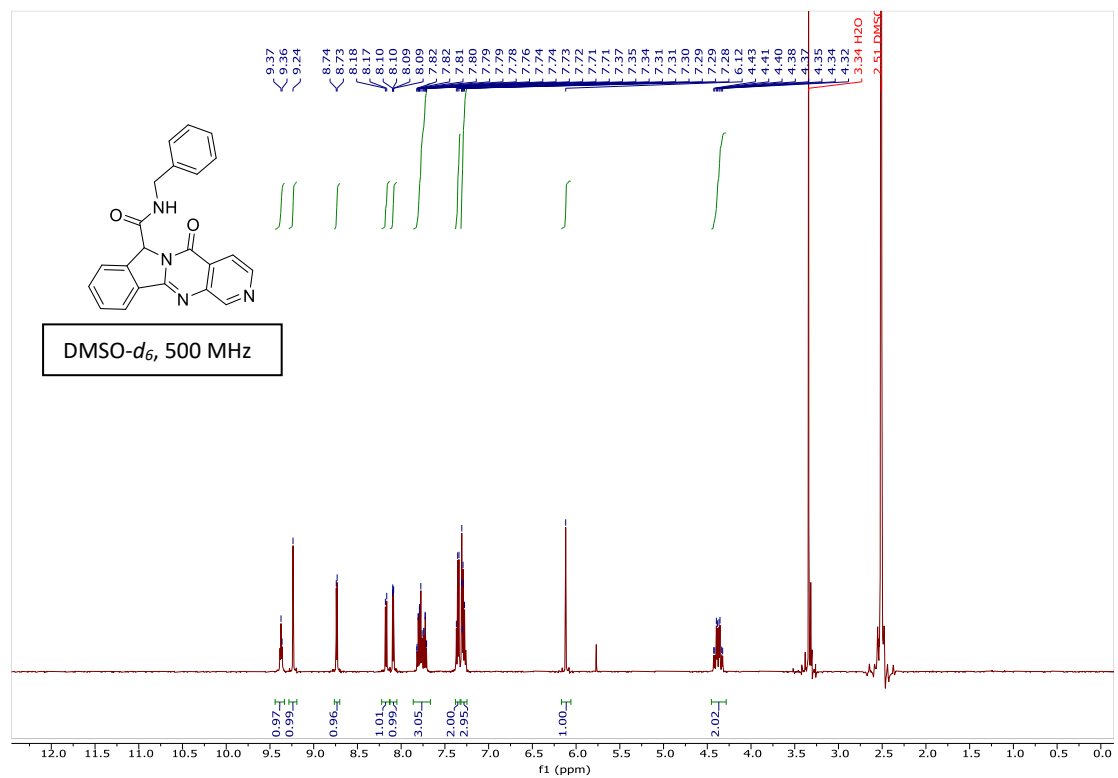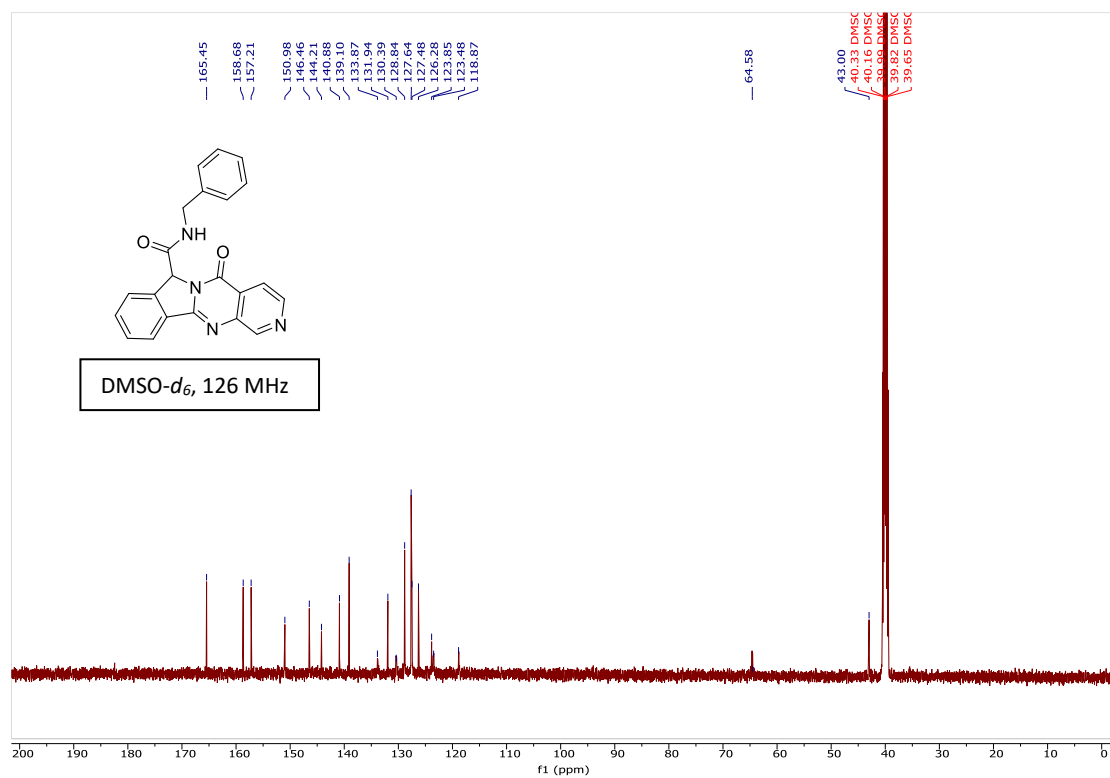

N-benzyl-3-methoxy-10-oxo-10,12-dihydroisindolo[1,2-b]quinazoline-12-carboxamide (**32b**)

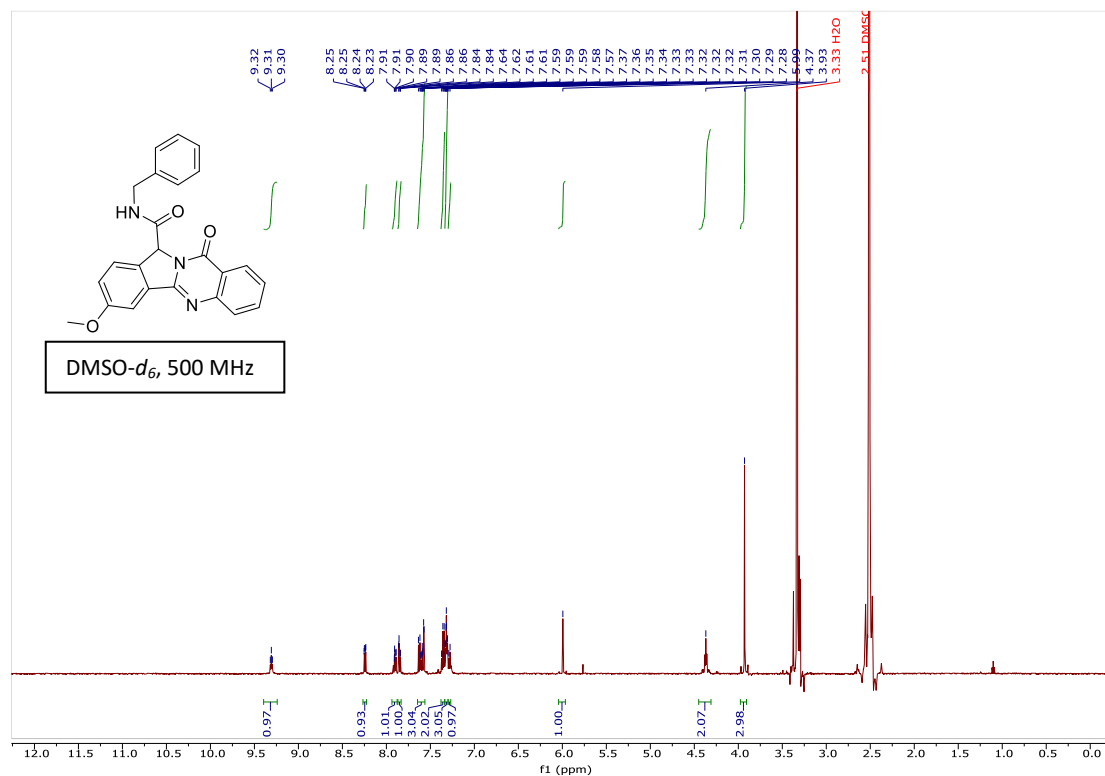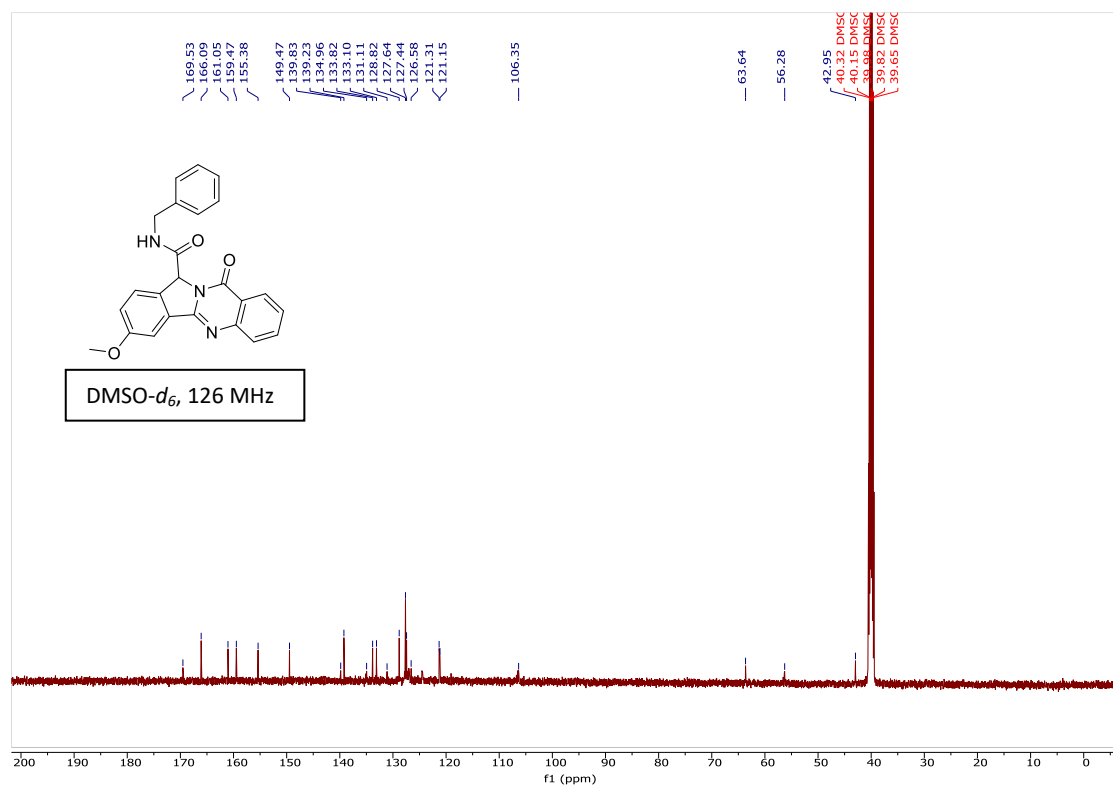

N-benzyl-3-fluoro-10-oxo-10,12-dihydroisindolo[1,2-b]quinazoline-12-carboxamide (**33b**)

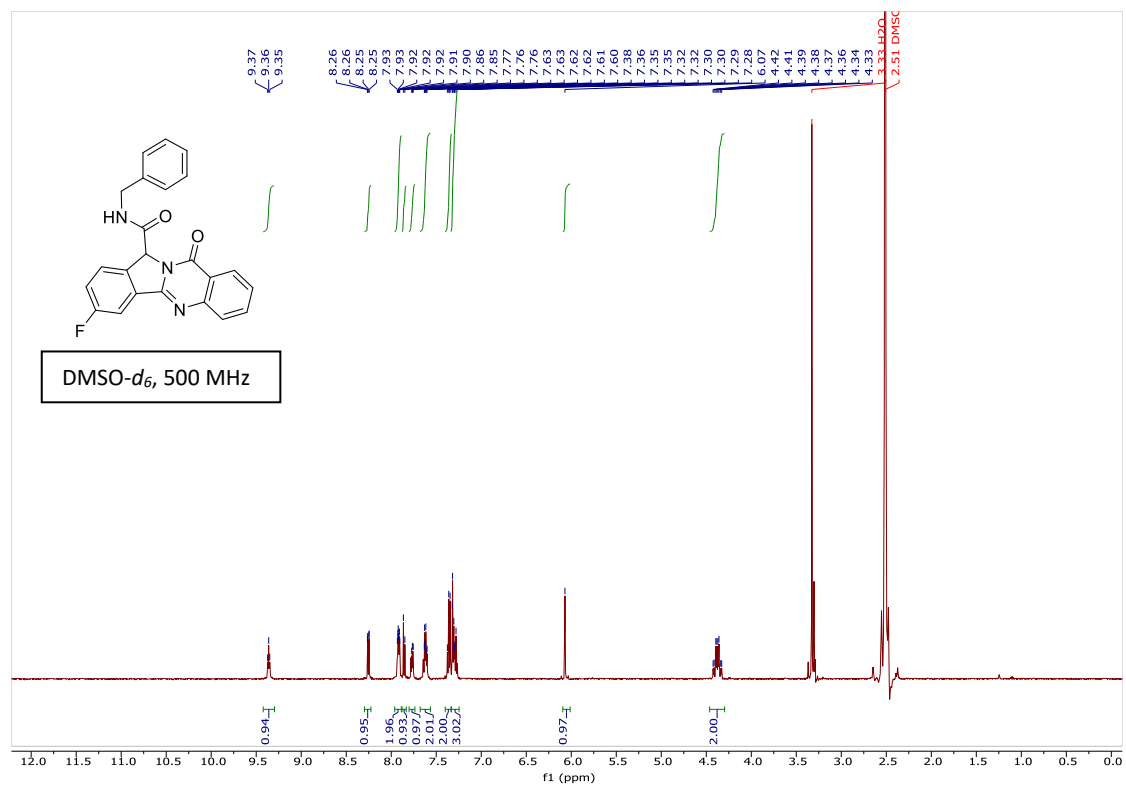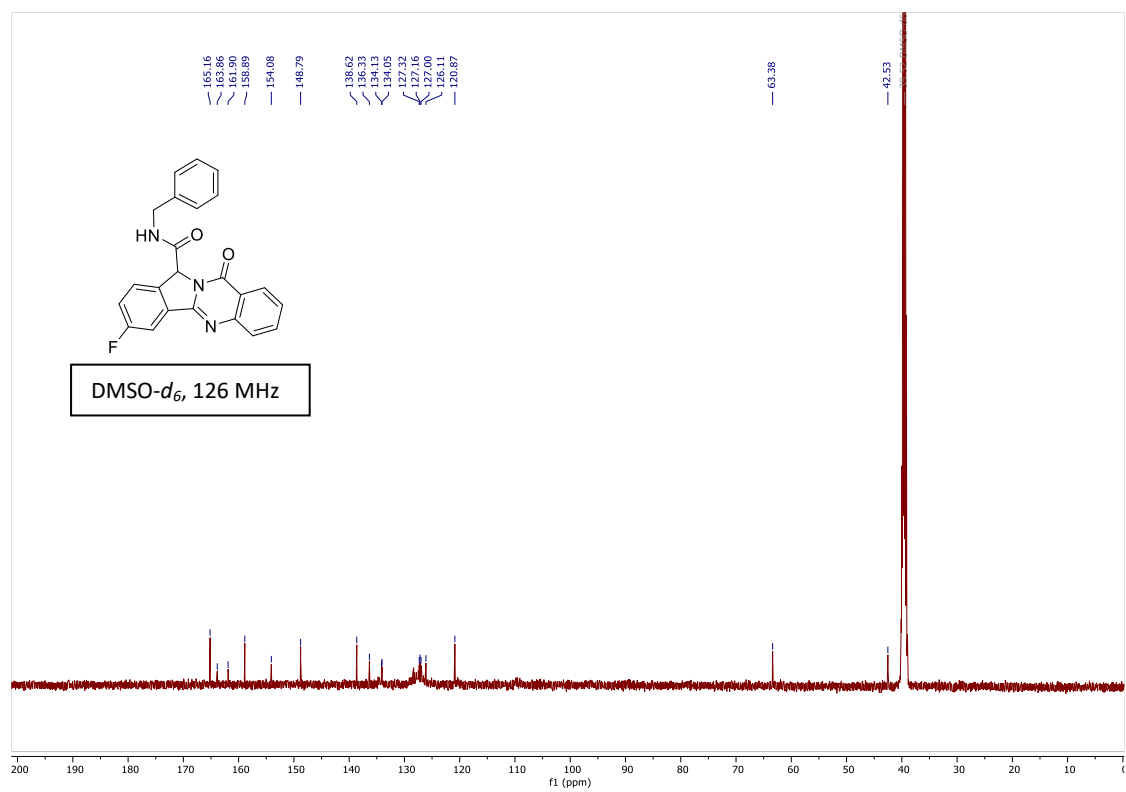

N-(2-chloro-6-fluoro-3-methylbenzyl)-10-oxo-10,12-dihydroisoindolo[1,2-b]quinazoline-12-carboxamide (**34b**)

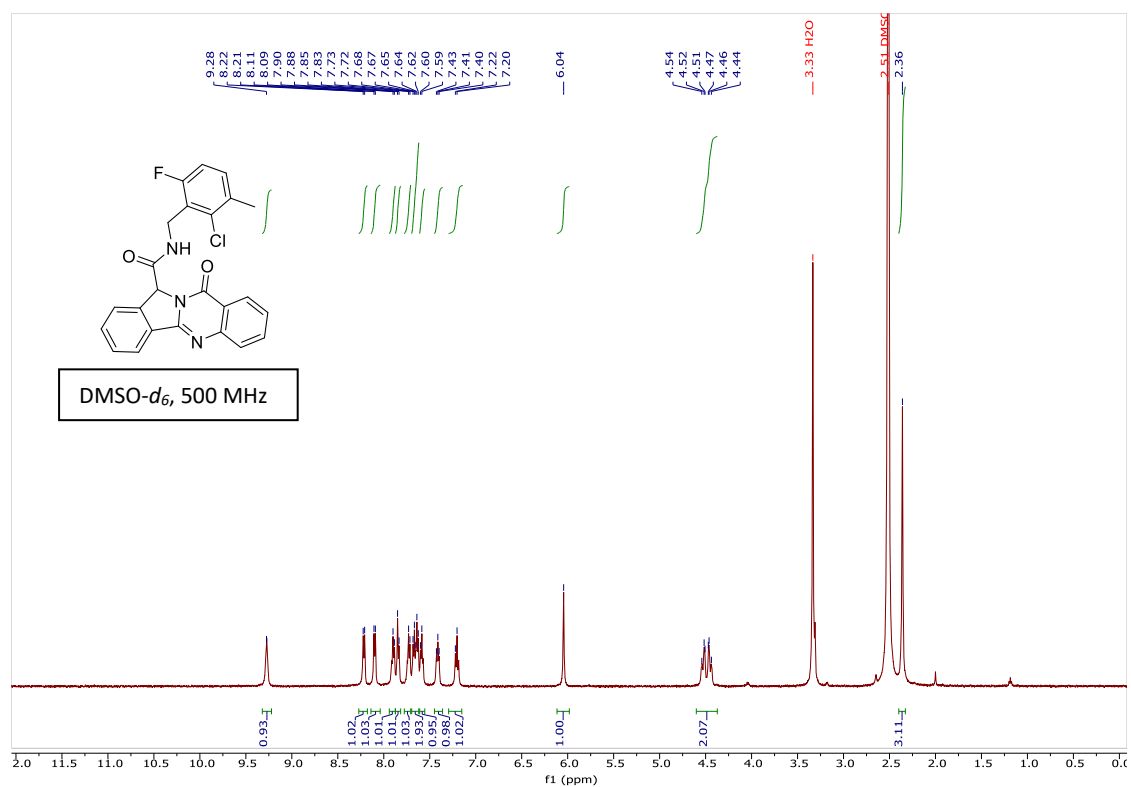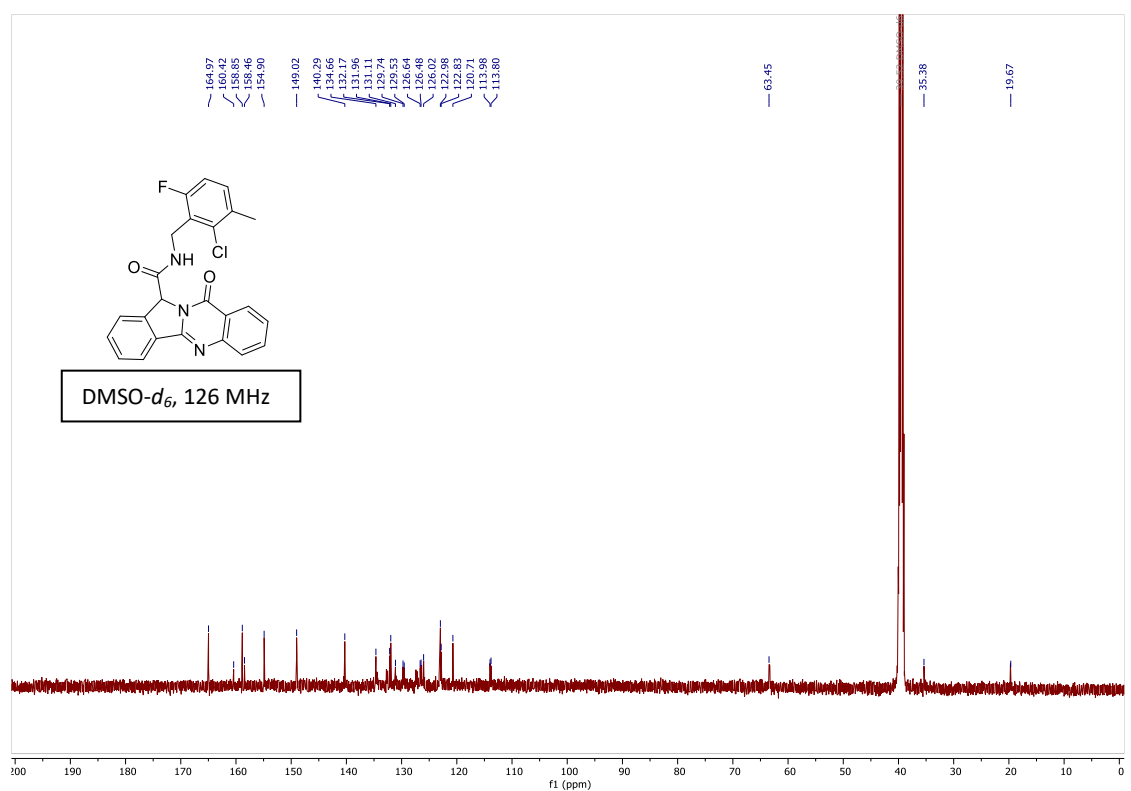

N-benzyl-11-oxo-11,13-dihydroquinolino[2',3':3,4]pyrrolo[2,1-b]quinazoline-13-carboxamide (**35b**)

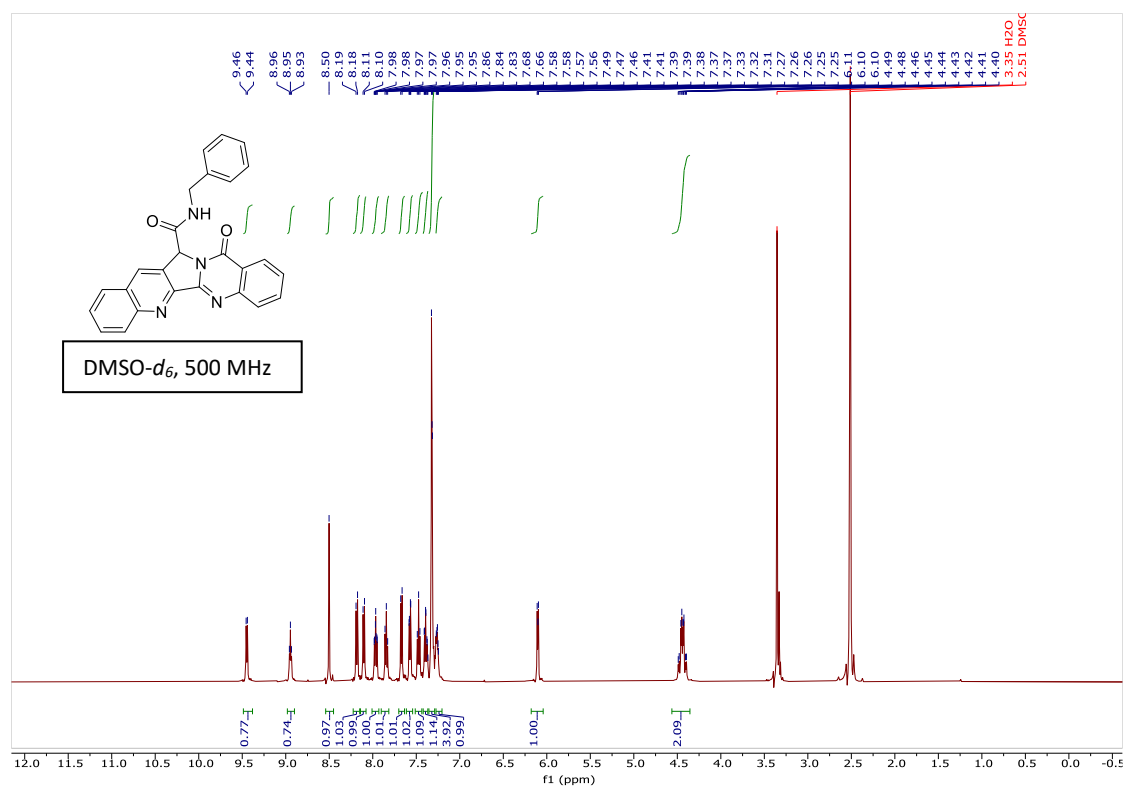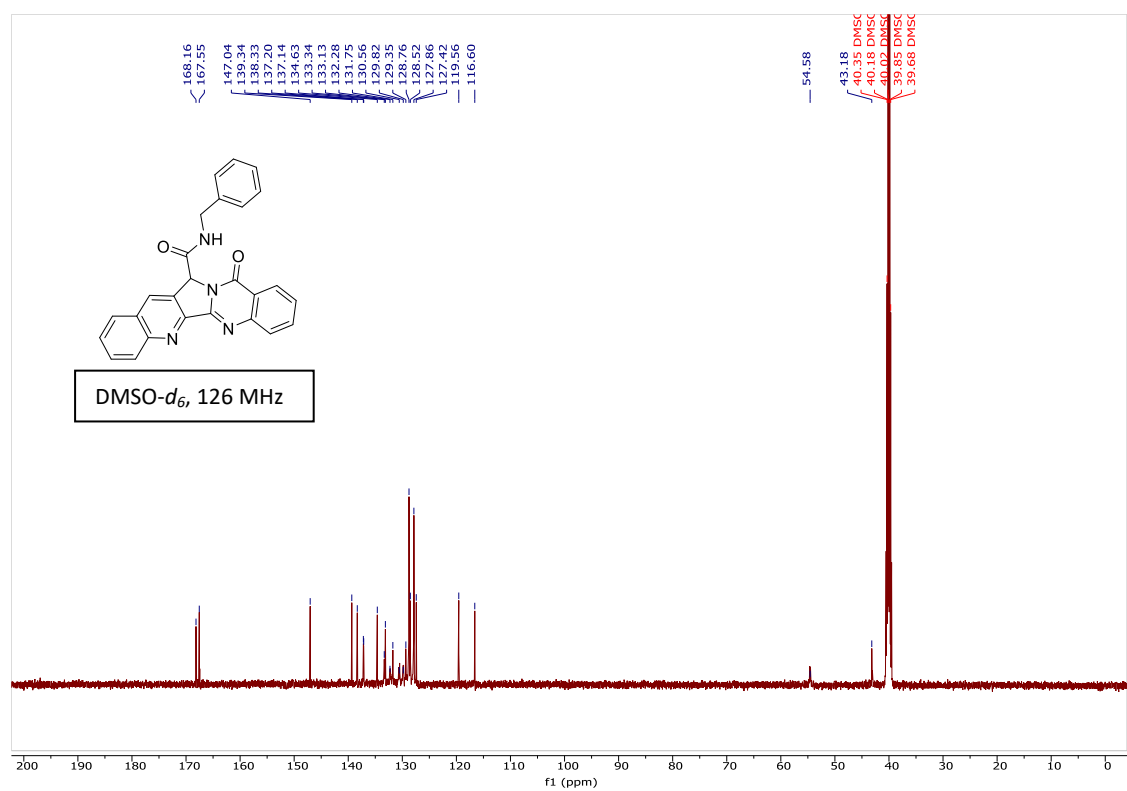

N-cyclohexyl-10-oxo-10,12-dihydroisindolo[1,2-b]quinazoline-12-carboxamide (**39b**)



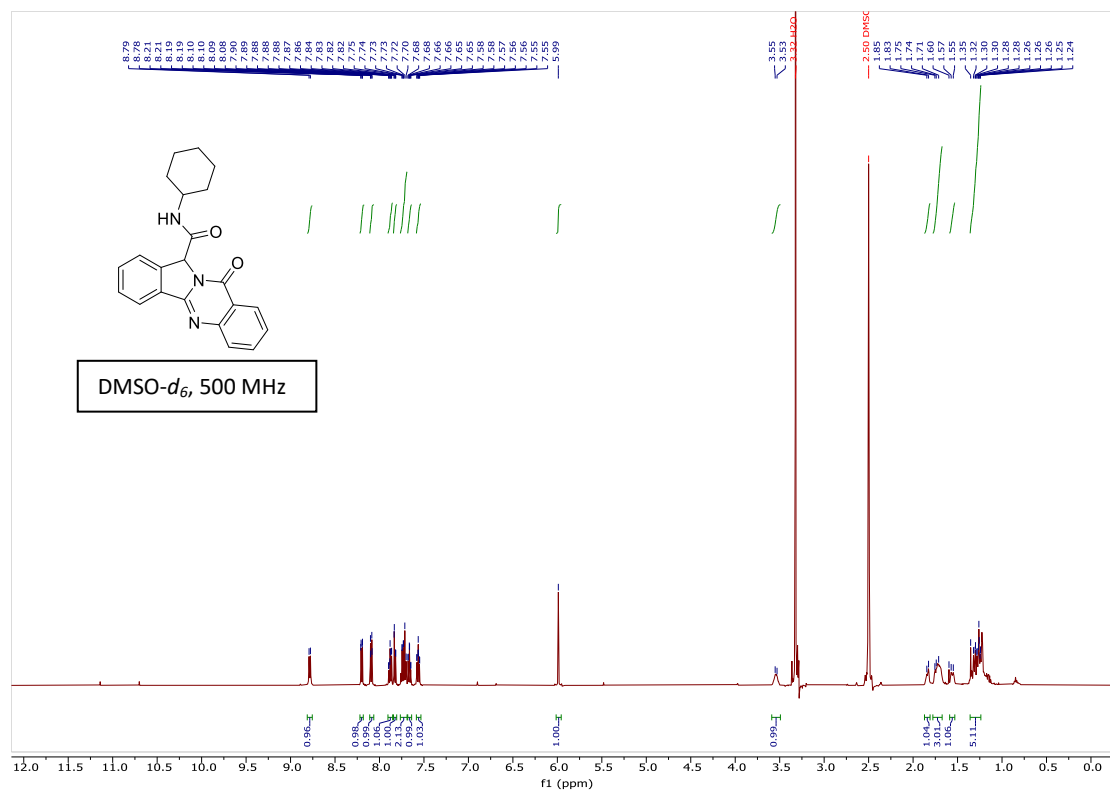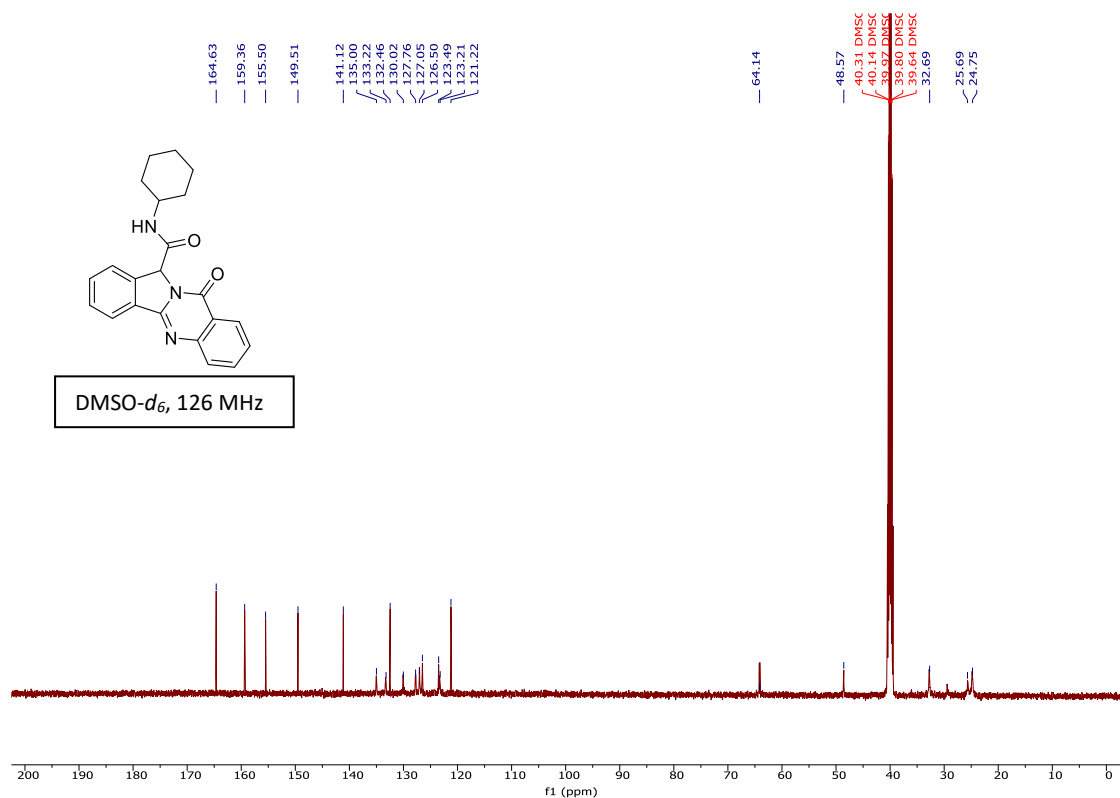

N-benzyl-10-oxo-10,12-dihydroisindolo[1,2-b]quinazoline-12-carboxamide (**40b**)

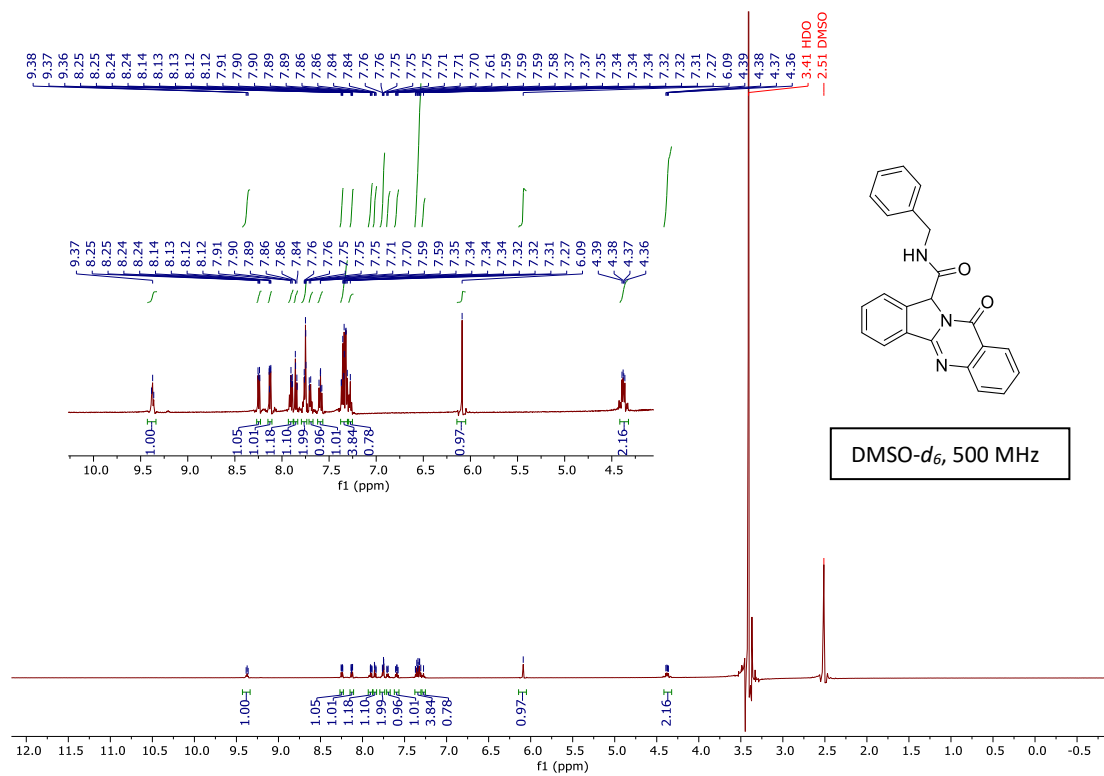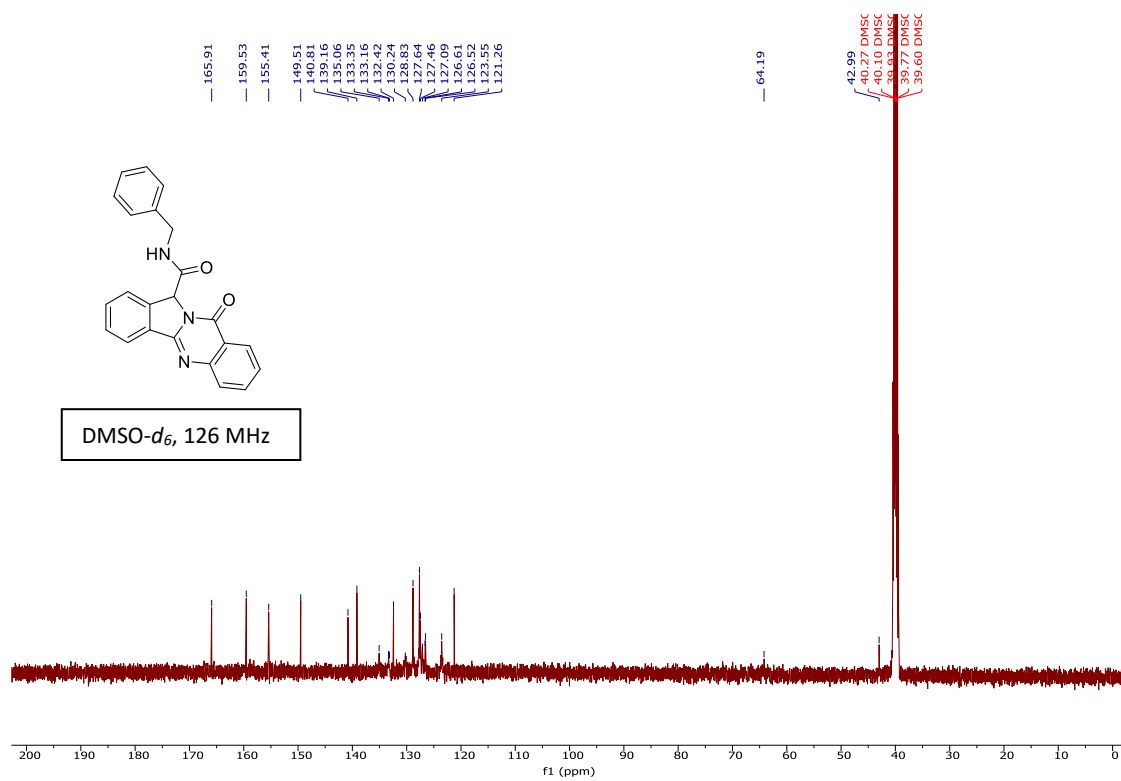

10-oxo-N-((tetrahydrofuran-2-yl)methyl)-10,12-dihydroisindolo[1,2-b]quinazoline-12-carboxamide (**41b**)

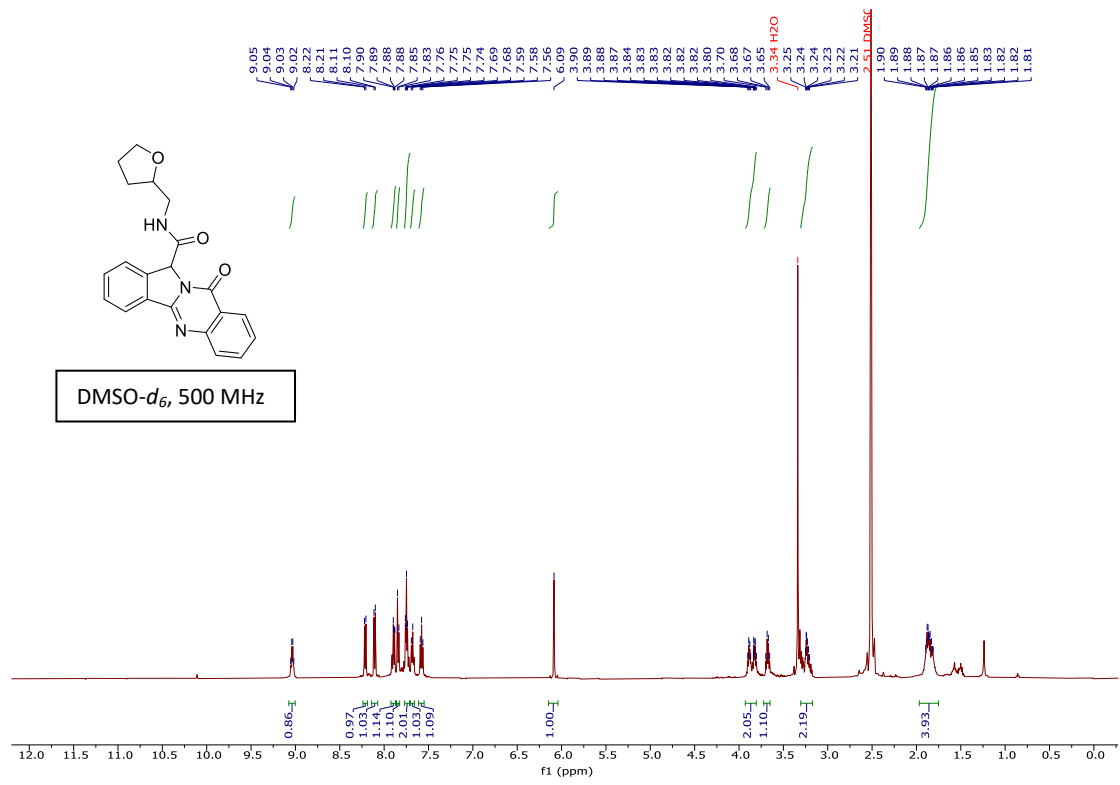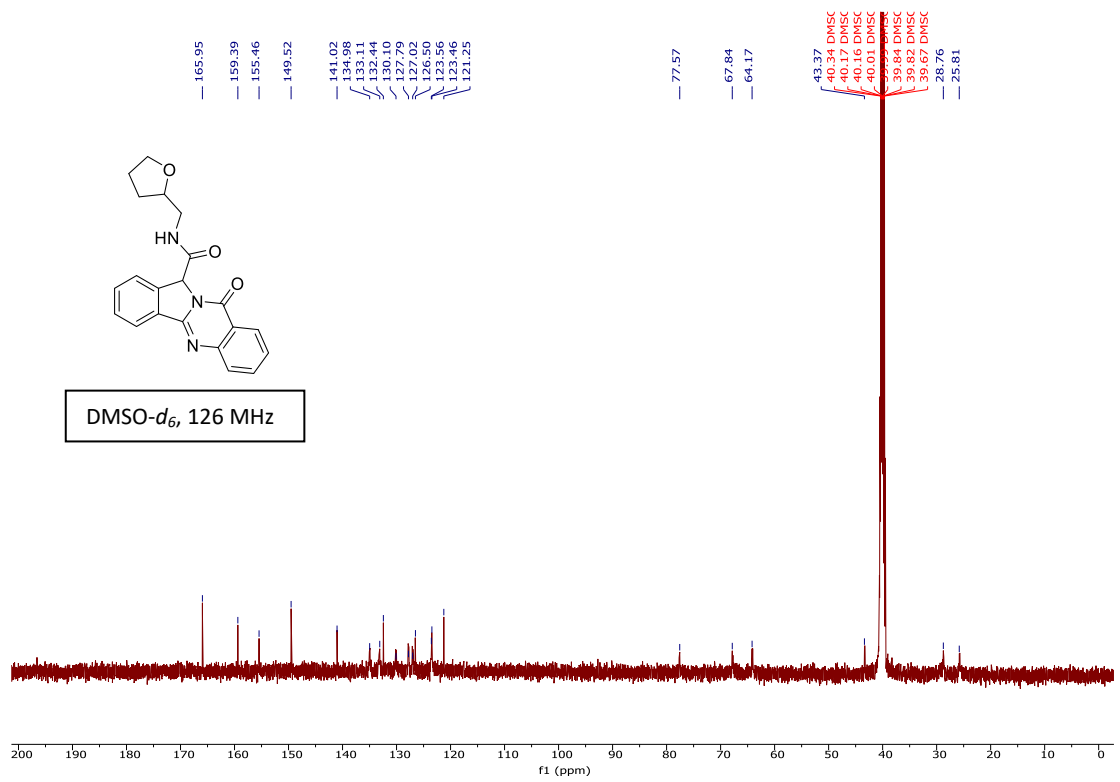

Supplement: jo2c01561_si_001.pdf [file jo2c01561_si_001.pdf]
